# Supplementary material for: Mice lacking triglyceride synthesis enzymes in adipose tissue are resistant to diet-induced obesity
Source: eLife journal article supplement (doi:10.7554/elife.88049), 2023-05-11
Supplement: data1 [file Body weights and DEXA analysis.xlsx]

## Sheet: Sheet1
Body weights and DEXA analysis
Mouse #	DOB	Genotype	Weight (gm)	Lean	Fat	Total	% fat
42	2017-12-28	D1D2 Flox	22.6	17.4	3	20.5	14.9
19	2017-12-15	D1D2 Flox	22.5	16.9	3.2	20.1	15.9
34	2017-12-15	D1D2 Flox	24.2	19.15	2.9	22.4	12.8
35	2017-12-15	D1D2 Flox	23.6	18.7	2.6	21.3	12.2
45	2017-12-28	D1D2 Flox	22.2	17.5	2.7	20.2	13.3
78	2018-01-01	D1D2 Flox	20.9	16.5	2.1	18.6	11.3
		Avg	22.6667	17.6917	2.75	20.5167	13.4
		Stdev	1.14833	1.03074	0.383406	1.27345	1.71581
		SEM	0.468805	0.420796	0.156525	0.519882	0.700476
43	2017-12-28	AD1D2 KO	22.1	17.2	1.6	18.8	8.7
58	2017-12-22	AD1D2 KO	21.5	17.3	1.5	16.8	9
60	2017-12-22	AD1D2 KO	22.2	17.4	1.9	19.2	9.7
73	2018-01-01	AD1D2 KO	22	16.4	1.6	18	8.8
76	2018-01-01	AD1D2 KO	21.4	17.9	1.7	19.7	8.7
77	2018-01-01	AD1D2 KO	21.5	16.6	1.2	15.8	7.5
		Avg	21.7833	17.1333	1.58333	18.05	8.73333
		Stdev	0.354495	0.550151	0.231661	1.499	0.711805
		SEM	0.144722	0.224598	0.0945751	0.611964	0.290593
		T Test	0.101987	0.268919	8.04135e-05	0.0118028	0.000107808
