# Supplementary material for: Mice lacking triglyceride synthesis enzymes in adipose tissue are resistant to diet-induced obesity
Source: eLife journal article supplement (doi:10.7554/elife.88049), 2023-05-11
Supplement: data1 [file Figure 2-source data 1.xlsx]

## Sheet: Cold_food
Cold exposre_with food_2018.07.23			Body temparature (°C)
Mouse #	Genotype	Weight (g)	t0	1h	2h	3h	4h	5h	6h
20 (R)	D1D2 flox	28.3	36.5	36.9	35.3	35	35.9	34.7	36.5
21 (L)	D1D2 Flox	28.2	36.5	37.7	36.4	36.7	36.2	36.3	36.8
23 (2R)	D1D2 Flox	28.7	37.5	35.6	34.5	34.5	35.2	35.4	35
29 (2R)	D1D2 Flox	27.6	37.5	36.8	35.6	35.5	36.2	35.3	36
25 (L)	D1D2 Flox	25.5	38	36.2	35.5	34.8	34.8	35.5	36.2
26 (RL)	D1D2 Flox	25.7	37.8	36.2	35.3	35.2	34.5	36.1	36.1
30 (R)	D1D2 Flox	26	38.2	36.7	35.8	36.6	36.3	35.8	36.6
38 (L)	D1D2 Flox	27	38	38	36.2	37.2	37	35.8	35.2
	Avg	27.125	37.5	36.7625	35.575	35.6875	35.7625	35.6125	36.05
	Stdev	1.26463	0.663325	0.794512	0.589794	1.00632	0.850105	0.502671	0.645866
22 (RL)	AD1D2 KO	28.5	37.5	35.9	36.1	35.1	34.6	35	35.5
27 (R)	AD1D2 KO	25.8	36	37	36	34.7	34.9	36	36
28 (L)	AD1D2 KO	28.5	36.3	37	36	35	34.9	36	35.5
32 (RL)	AD1D2 KO	27.5	36.5	36.2	35	35.6	36.5	37.2	37
33 (2R)	AD1D2 KO	25.3	38	37.8	36.6	36.3	35	35.5	35.6
36 (2R)	AD1D2 KO	26.6	38	37.3	35.6	35.6	34.7	34.8	36
37 (R)	AD1D2 KO	25.8	37.8	37.9	36.1	36.3	35.4	35.5	35.7
39 (RL)	AD1D2 KO	24.7	37.9	36.3	36	34.5	34.7	35.9	36.2
	Avg	26.5875	37.25	36.925	35.925	35.3875	35.0875	35.7375	35.9375
	Stdev	1.44463	0.840068	0.740174	0.462138	0.681254	0.622065	0.740536	0.501248

## Sheet: Cold_no food
Cold exposre_without food			Body temparature (°C)
Mouse #	Genotype	Weight (g)	t0	1h	2h	3h	4h	5h	6h
40 (2R)	Flox	24.5	37.1	34.4	34.5	34	34	34
42 (L)	Flox	24	37.9	36	35.2	34.5	35.8	35
43 (RL)	Flox	25	37.5	36.4	34.8	35.5	36	36.2
44 (2R)	Flox	25.9	37.7	35.8	35.2	34.4	35	35
46 (R)	Flox	25.1	37	35.8	36.1	36	35.8	35.5
50 (R)	Flox	25.4	37.5	35.5	35.4	35.5	35.6	35
55 (L)	Flox	25.6	37.1	35.2	35.4	35	35.6	35.5
a36 (RL)	Flox	28.5	37	36.1	36	35.6	35.6	36.2
	Avg		37.35	35.65	35.325	35.0625	35.425	35.3
	Stdev		0.34641	0.623355	0.541822	0.700892	0.645313	0.723089
41 (R)	KO	26.8	38.1	36.2	35.3	33.7	26.4
45 (2RL)	KO	25	37.2	36.5	35.5	32.9	28
47 (L)	KO	24.2	37.3	35	35.2	30.6	26
49 (2R)	KO	26.5	37.5	36.8	34.1	33.1	28
51 (L)	KO	26	37.6	35	34.3	33.4	24.5
57 (2R)	KO	25.1	38.1	34.8	35	33.5	28
a37 (2R)	KO	26.2	36.6	35.5	35.5	33	29
a40 (2RL)	KO	25.9	36.6	34.6	34.5	32.6	29
	Avg		37.375	35.55	34.925	32.85	27.3625
	Stdev		0.580025	0.841767	0.552268	0.975412	1.58379
	t test		0.927688	0.44943	0.789173	0.0357417	2.40879e-05

## Sheet: 14 h fasted mice
14h fasted mice
Mouse #	Genotype	body weights	fasted weights	weight loss	% loss	fastedglucose	temp before fast	fasted temp													Before fast
7 (2R)	D1D2 flox	31.6	29.4	2.2	6.96203	120	36.9	35.9													After 14 h fast
8 (R)	D1D2 flox	32	28.9	3.1	9.6875	112	36.5	36.8
9 (L)	D1D2 flox	31.6	27.7	3.9	12.3418	114	35.9	38
12 (2RL)	D1D2 flox	29.7	25.7	4	13.468	104	36.8	36.9
8 (2L)	D1D2 flox	33.6	31.3	2.3	6.84524	108	36.5	36
9 (RL)	D1D2 flox	32.3	29.2	3.1	9.59752	111	36	35
	Avg	31.8	28.7	3.1	9.81701	111.5	36.4333	36.4333
	Stdev	1.26649	1.87297	0.761577	2.71115	5.43139	0.408248	1.0328
7 (2R)	ADGAT DKO	31.8	27.4	4.4	13.8365	130	35.4	29.7
10 (2RL)	ADGAT DKO	32	27.4	4.6	14.375	112	35.8	29.5
13 (R)	ADGAT DKO	29.3	25.4	3.9	13.3106	133	36.2	30.2
19 (2R)	ADGAT DKO	29.2	24.2	5	17.1233	125	35.5	32
92	ADGAT DKO	29.8	25.6	4.2	14.094	140	36	32
93	ADGAT DKO	31	25.3	5.7	18.3871	134	35.4	30.8
a34 (R)	ADGAT DKO	29.6	24.5	5.1	17.2297	144	35.8	31.5
	Avg	30.3857	25.6857	4.7	15.4794	131.143	35.7286	30.8143
	Stdev	1.19224	1.27335	0.61101	2.03154	10.4949	0.309377	1.05108
	t-test	0.0624966	0.00551355	0.0014678	0.00124775	0.00170466	0.00462305	1.01669e-06

## Sheet: Ketones
Ketone bodies
	μmol/L
	300	2.7057	2.6213	2.6635
	150	1.959	1.9004	1.9297
	75	1.4997	1.4613	1.4805
	37.5	1.2535	1.228	1.24075
	18.75	1.1496	1.1013	1.12545
Ad lib.	D1D2 flox	2.9668	2.9698	2.9683	348.364	363.166	59.9208
		2.5893	2.6672	2.62825	286.536
		3.3526	3.3772	3.3649	420.473
		2.6066	2.6557	2.63115	287.064
		3.091	3.1504	3.1207	376.073
		2.9463	3.001	2.97365	349.336
		3.1252	3.1299	3.12755	377.318
		3.5781	3.5883	3.5832	460.164
	AD1D2KO	2.2185	2.1621	2.1903	206.909	165.969	34.1215	1.20419e-06
		2.1024	2.1652	2.1338	196.636
		2.0198	2.0525	2.03615	178.882
		1.6934	1.6767	1.68505	115.045
		1.7407	1.7145	1.7276	122.782
		2.058	2.0572	2.0576	182.782
		2.043	2.038	2.0405	179.673
		1.8518	1.8483	1.85005	145.045
14 h fast	D1D2 flox	3.8469	3.71	3.77845	495.664	501.732	6.26022	0.000119024
		3.8561	3.7945	3.8253	504.182
		3.8276	3.8486	3.8381	506.509
		3.703	3.9962	3.8496	508.6
		3.8481	3.7869	3.8175	502.764
		3.8232	3.7008	3.762	492.673
	AD1D2KO	3.9183	3.7961	3.8572	509.982	462.587	45.4275	0.0641045	3.50847e-08
		3.9335	3.8089	3.8712	512.527
		3.5349	3.4606	3.49775	444.627
		3.3793	3.4274	3.40335	427.464
		3.3527	3.3536	3.35315	418.336
