# Supplementary material for: Mice lacking triglyceride synthesis enzymes in adipose tissue are resistant to diet-induced obesity
Source: eLife journal article supplement (doi:10.7554/elife.88049), 2023-05-11
Supplement: data1 [file Figure 3 -source data 1.xlsx]

## Sheet: Bllod glucose
Blood glucose (mg/dl)
Mouse #	DOB	Genotype	1	2	Average
230	2017-11-05	D1D2 Flox	164	188	176
42	2017-12-28	D1D2 Flox	160	170	165
19	2017-12-15	D1D2 Flox	173	158	165.5		Blood glucose (mg/dl)
34	2017-12-15	D1D2 Flox	140	149	144.5
35	2017-12-15	D1D2 Flox	187	202	194.5
45	2017-12-28	D1D2 Flox	163	169	166
78	2018-01-01	D1D2 Flox	185	187	169
79	2018-01-01	D1D2 Flox	190	159	174.5
		Avg			169.375
		Stdev			13.9687
		SEM			4.93869
227	2017-11-05	ADGAT DKO	140	131	135.5
228	2017-11-05	ADGAT DKO	146	130	138
21	2017-12-15	ADGAT DKO	169	158	163.5
22	2017-12-15	ADGAT DKO	144	157	150.5
43	2017-12-28	ADGAT DKO	128	125	126.5
58	2017-12-22	ADGAT DKO	136	135	135.5
60	2017-12-22	ADGAT DKO	133	119	126
73	2018-01-01	ADGAT DKO	154	170	162
76	2018-01-01	ADGAT DKO	168	148	158
77	2018-01-01	ADGAT DKO	167	140	153.5
		Avg			144.9
		Stdev			14.2805
		SEM			4.5159
		T Test			0.00216881

## Sheet: Insulin
Plasma Insulin
Application: Tecan i-control				Tecan i-control , 1.12.4.0
Device: infinite 200				Serial number: 812001435				Serial number of connected stacker:					Insulin (ng/ml)			Avg								0	0.065
Firmware: V_2.11_04/08_InfiniTe (Apr 4 2008/14.37.11)				MAI, V_2.11_04/08_InfiniTe (Apr 4 2008/14.37.11)									6.9	2.203	2.4596	2.3313								0.5	0.0951
													3.75	0.9143	0.9469	0.9306								1.25	0.1939
Date:	2018-06-10												1.25	0.1939	0.1908	0.19235								3.75	0.9143
Time:	2:27:28 PM												0.5	0.0951	0.0895	0.0923								6.9	2.203
													0	0.065	0.0614	0.0632
System				HSPH-F7QMJB2
User				HSPH-F7QMJB2\FareseWalther
Plate				Nunclon 96 Flat Bottom Transparent Polystyrol [NUN96ft.pdfx]									D1D2 Flox			Avg	(ng/ml)	Avg	Stdev	t test
Plate-ID (Stacker)													Mouse #1	0.0736	0.0732	0.0734	0.534353	0.548605	0.0251098	0.454648		Plasma Insulin (ng/ml)
													Mouse #2	0.0738	0.0756	0.0747	0.538254
													Mouse #3	0.0709	0.0671	0.069	0.521152
Label: Label1													Mouse #4	0.075	0.0753	0.07515	0.539604
Mode				Absorbance									Mouse #5	0.087	0.084	0.0855	0.570657
Wavelength				450	nm								Mouse #6	0.0925	0.0898	0.09115	0.587609
Bandwidth				9	nm								AD1D2 KO
Number of Flashes				25									Mouse #1	0.0728	0.0763	0.07455	0.537804	0.540054	0.00972115
Settle Time				0	ms								Mouse #2	0.0716	0.0747	0.07315	0.533603
Part of Plate				A1-H6									Mouse #3	0.0777	0.0815	0.0796	0.552955
Start Time:	6/10/2018 2:27:28 PM												Mouse #4	0.0716	0.0744	0.073	0.533153
													Mouse #5	0.0795	0.0788	0.07915	0.551605
	Temperature: 24.8 °C												Mouse #6	0.0724	0.0723	0.07235	0.531203
<>	1	2	3	4	5	6
A	0.065	0.0614	0.0736	0.0732	0.0728	0.0763							Control Insulin
B	2.203	2.4596	0.0738	0.0756	0.0716	0.0747								0.1307	0.1319	0.1313	0.708071
C	0.9143	0.9469	0.0709	0.0671	0.0777	0.0815								0.8743	1.0653	0.9698	3.22382
D	0.1939	0.1908	0.075	0.0753	0.0716	0.0744
E	0.0951	0.0895	0.087	0.084	0.0795	0.0788
F	0.0762	0.0693	0.0925	0.0898	0.0724	0.0723
G	0.1307	0.1319	0.0694	0.0653	0.067	0.0651
H	0.8743	1.0653	0.071	0.064	0.0632	0.0657
End Time:	6/10/2018 2:28:10 PM

## Sheet: NEFA
			Plasma non esterified free fatty acids (NEFA)
Application: Tecan i-control				Tecan i-control , 1.12.4.0
Device: infinite 200				Serial number: 812001435				Serial number of connected stacker:					FA (m mol/l)			Avg
Firmware: V_2.11_04/08_InfiniTe (Apr 4 2008/14.37.11)				MAI, V_2.11_04/08_InfiniTe (Apr 4 2008/14.37.11)									1	0.3755	0.3914	0.38345
													0.5	0.2268	0.215	0.2209
Date:	2018-06-09												0.25	0.1408	0.1289	0.13485
Time:	1:25:02 PM												0.125	0.0984	0.0976	0.098
													0.0625	0.0779	0.082	0.07995
													0.03125	0.0698	0.0693	0.06955
System				HSPH-F7QMJB2									0	0.0613	0.0607	0.061
User				HSPH-F7QMJB2\FareseWalther
Plate				Nunclon 96 Flat Bottom Transparent Polystyrol [NUN96ft.pdfx]									D1D2 Flox			Avg	FA (m mol/l)	Avg	Stdev	t test		Plasma FA (m mol/l)
Plate-ID (Stacker)													Mouse #1	0.231	0.2358	0.2334	0.539839	0.452687	0.0833823	0.0040922
													Mouse #2	0.1723	0.1715	0.1719	0.349907
													Mouse #3	0.1332	0.136	0.1346
Label: Label1													Mouse #4	0.226	0.2287	0.22735	0.521155
Mode				Absorbance									Mouse #5	0.2121	0.2085	0.2103	0.468499
Wavelength				562	nm								Mouse #6	0.1813	0.1846	0.18295	0.384033
Bandwidth				9	nm								AD1D2 KO
Number of Flashes				25									Mouse #1	0.1754	0.1527	0.16405	0.325664	0.294657	0.0308453
Settle Time				0	ms								Mouse #2	0.4125	0.4073	0.4099
Part of Plate				A1-H6									Mouse #3	0.148	0.1474	0.1477	0.27517
Start Time:	6/9/2018 1:25:02 PM												Mouse #4	0.1557	0.152	0.15385	0.294163
													Mouse #5	0.1658	0.1611	0.16345	0.323811
	Temperature: 26.3 °C												Mouse #6	0.1432	0.1388	0.141	0.254478
<>	1	2	3	4	5	6
A	0.3755	0.3914	0.231	0.2358	0.1754	0.1527
B	0.2268	0.215	0.1723	0.1715	0.4125	0.4073
C	0.1408	0.1289	0.1332	0.136	0.148	0.1474
D	0.0984	0.0976	0.226	0.2287	0.1557	0.152
E	0.0779	0.082	0.2121	0.2085	0.1658	0.1611
F	0.0698	0.0693	0.1813	0.1846	0.1432	0.1388
G	0.0644	0.0671	0.0617	0.0627	0.0632	0.0617
H	0.0613	0.0607	0.061	0.0772	0.0586	0.0596
End Time:	6/9/2018 1:25:44 PM

## Sheet: Plasma TG
Plasma triglycerides
Application: Tecan i-control				Tecan i-control , 1.12.4.0
Device: infinite 200				Serial number: 812001435				Serial number of connected stacker:					µM Triolein			Avg
Firmware: V_2.11_04/08_InfiniTe (Apr 4 2008/14.37.11)				MAI, V_2.11_04/08_InfiniTe (Apr 4 2008/14.37.11)									1410	0.8101	0.8553	0.8327
													705	0.4652	0.485	0.4751
Date:	2018-06-09												352.5	0.3105	0.3121	0.3113
Time:	11:30:23 AM												176.25	0.2064	0.2063	0.20635
													88.125	0.1567	0.1627	0.1597
													44	0.1332	0.1348	0.134
System				HSPH-F7QMJB2									0	0.1153	0.1135	0.1144
User				HSPH-F7QMJB2\FareseWalther
Plate				Nunclon 96 Flat Bottom Transparent Polystyrol [NUN96ft.pdfx]
Plate-ID (Stacker)													µg/µl Triolein			Avg
													1.25	0.8101	0.8553	0.8327
													0.625	0.4652	0.485	0.4751
Label: Label1													0.312	0.3105	0.3121	0.3113
Mode				Absorbance									0.156	0.2064	0.2063	0.20635
Wavelength				492	nm								0.0781	0.1567	0.1627	0.1597
Bandwidth				9	nm								0.039	0.1332	0.1348	0.134
Number of Flashes				25									0	0.1153	0.1135	0.1144
Settle Time				0	ms
Part of Plate				A1-H6																				Plasma TG (mg/dl)
Start Time:	6/9/2018 11:30:23 AM												D1D2 flox			Avg	TG (mg/ml)	TG (mg/dl)	Avg	Stdev	t test
													Mouse #1	0.4463	0.4811	0.4637	0.603097	60.3097	62.0585	22.7372	0.938042
	Temperature: 21.5 °C												Mouse #2	0.4878	0.5159	0.50185	0.66948	66.948
<>	1	2	3	4	5	6							Mouse #3	0.3491	0.357	0.35305	0.410562	41.0562
A	0.8101	0.8553	0.4463	0.4811	0.5983	0.621							Mouse #4	0.7078	0.7203	0.71405	1.03872	103.872
B	0.4652	0.485	0.4878	0.5159	0.3096	0.3139							Mouse #5	0.455	0.4283	0.44165	0.564729	56.4729
C	0.3105	0.3121	0.3491	0.357	0.5475	0.5584							Mouse #6	0.3627	0.3737	0.3682	0.436924	43.6924
D	0.2064	0.2063	0.7078	0.7203	0.5661	0.5759							A-DGAT DKO
E	0.1567	0.1627	0.455	0.4283	0.3942	0.4027							Mouse #1	0.5983	0.621	0.60965	0.857056	85.7056	63.0488	20.2311
F	0.1332	0.1348	0.3627	0.3737	0.4406	0.4251							Mouse #2	0.3096	0.3139	0.31175	0.338698	33.8698
G	0.1212	0.1241	0.1121	0.1341	0.1133	0.1119							Mouse #3	0.5475	0.5584	0.55295	0.758396	75.8396
H	0.1153	0.1135	0.1117	0.1222	0.1131	0.2397							Mouse #4	0.5661	0.5759	0.571	0.789803	78.9803
													Mouse #5	0.3942	0.4027	0.39845	0.48956	48.956
													Mouse #6	0.4406	0.4251	0.43285	0.549417	54.9417
End Time:	6/9/2018 11:31:05 AM

## Sheet: Plasma leptin levels
Plasma leptin levels
Application: Tecan i-control				Tecan i-control , 1.12.4.0
Device: infinite 200				Serial number: 812001435				Serial number of connected stacker:
Firmware: V_2.11_04/08_InfiniTe (Apr 4 2008/14.37.11)				MAI, V_2.11_04/08_InfiniTe (Apr 4 2008/14.37.11)
Date:	2021-12-08
Time:	3:59:21 PM								Leptin (pg/ml)
									1600	0.5918
									800	0.3973
System				HSPH-F7QMJB2					200	0.2426
User				HSPH-F7QMJB2\FareseWalther					100	0.1965
Plate									50	0.1546
Plate-ID (Stacker)									25	0.1344
									0	0.1174
Label: Label1
Mode				Absorbance
Wavelength				450	nm																				D1D2 flox
Bandwidth				9	nm																				ADGAT DKO
Number of Flashes				25					Plasma leptin (n=8)			(pg/ml)	x2	(ng/ml)	Avg	Stdev	t test								ob/ob
Settle Time				0	ms					D1D2 flox 1	0.5425	1313.33	2626.67	2.62667	3.10267	1.28711
Part of Plate				A1-H6						D1D2 flox 2	0.8767	2427.33	4854.67	4.85467
Start Time:	12/8/2021 3:59:21 PM									D1D2 flox 3	0.4299	938	1876	1.876
										D1D2 flox 4	0.3846	787	1574	1.574
	Temperature: 26.8 °C									D1D2 flox 6	0.7489	2001.33	4002.67	4.00267
<>	1	2	3	4	5	6				D1D2 flox 7	0.7008	1841	3682	3.682
A	0.5918	0.3185	0.3685	0.2146	0.1882	0.0002				ADGAT DKO 1	0.3685	733.333	1466.67	1.46667	1.69722	0.489197	0.0314361
B	0.3973	0.5425	0.563	0.1939	0.204	0.0002				ADGAT DKO 3	0.3004	506.333	1012.67	1.01267
C	0.4152	0.8767	0.3004	0.1939	0.2327	0.0003				ADGAT DKO 4	0.4958	1157.67	2315.33	2.31533
D	0.2426	0.4299	0.4958	0.1996	0.2427	0.0004				ADGAT DKO 5	0.3555	690	1380	1.38
E	0.1965	0.3846	0.3555	0.1957	0.2297	0.0004				ADGAT DKO 6	0.4429	981.333	1962.67	1.96267
F	0.1546	0.3513	0.4429	0.1543	0.1947	0.0003				ADGAT DKO 8	0.4554	1023	2046	2.046
G	0.1344	0.7489	0.2395	0.1312	0.1527	0.0005				Ob/Ob_ 1	0.2146	220.333	440.667	0.440667	0.340267	0.0582306	0.00104222
H	0.1174	0.7008	0.4554	0.1904	0.1114	0.0005				Ob/Ob_ 2	0.1939	151.333	302.667	0.302667
										Ob/Ob_ 3	0.1939	151.333	302.667	0.302667
										Ob/Ob_ 4	0.1996	170.333	340.667	0.340667
										Ob/Ob_ 5	0.1957	157.333	314.667	0.314667
End Time:	12/8/2021 4:00:03 PM

## Sheet: GTT
Glucose tolerance test
Mouse #	Genotype	Weight (gm)	Glucose(mg)	Glucose (µl)	Diluted	0	15	30	60	120
46	Flox	24.6	49.2	98.4	196.8	175	430	390	241	158													0
47	Flox	21.7	43.4	86.8	173.6	145	339	268	200	136													15
50	Flox	25.4	50.8	101.6	203.2	166	300	247	218	141													30
51	Flox	25	50	100	200	110	280	272	130	142													60
52	Flox	21	42	84	168	132	280	239	141	121													120
57	Flox	24.5	49	98	196	162	270	282	207	180													180
58	Flox	22.3	44.6	89.2	178.4	158	288	262	230	148
60	Flox	24.3	48.6	97.2	194.4	154	316	232	203	165
62	Flox	22.8	45.6	91.2	182.4	167	230	200	164	137													D1D2 flox
64	Flox	22.4	44.8	89.6	179.2	140	250	194	160	141													AD1D2 KO
	Avg	23.4				150.9	298.3	258.6	189.4	146.9
	Stdev	1.53623				19.536	55.6698	54.6976	38.1756	16.7627
	SEM	0.485798				6.17783	17.6043	17.2969	12.0722	5.30084
48	KO	25.5	51	102	204	130	377	323	209	164
49	KO	24.5	49	98	196	155	401	279	216	161
53	KO	23.3	46.6	93.2	186.4	130	293	210	160	132
54	KO	22	44	88	176	138	270	240	170	139
55	KO	22.5	45	90	180	120	271	204	177	148
56	KO	23.7	47.4	94.8	189.6	141	237	210	189	132
59	KO	24.4	48.8	97.6	195.2	144	257	207	205	180
61	KO	26.7	53.4	106.8	213.6	144	312	270	196	182
68	KO	23.7	47.4	94.8	189.6	144	225	190	162	143
65	KO	23.1	46.2	92.4	184.8	130	250	230	206	145
	Avg	23.94				137.6	289.3	236.3	189	152.6
	Stdev	1.40016				10.1127	58.5587	42.1085	20.5426	18.3194
	SEM	0.442769				3.19792	18.5179	13.3159	6.49615	5.7931
	t test	0.422087				0.0719421	0.728745	0.320511	0.977044	0.477233

## Sheet: ITT
Insulin tolerance test
Mouse #	Genotype	Weight (gm)	Insulin (ul)	Diluted	0	15	30	60	120
36	Flox	23.8	23.8	119	133	114	51	61	77
38	Flox	24	24	120	131	115	82	91	108
78	Flox	26.5	26.5	132.5	158
79	Flox	21.9	21.9	109.5	142	117	69	57	74
80	Flox	22.6	22.6	113	144	105	46	57	90
81	Flox	21.9	21.9	109.5	160	125	84	69	95
85	Flox	21.4	21.4	107	156	117	102	79	74
86	Flox	22.8	22.8	114	175	140	115	92	105
88	Flox	22.1	22.1	110.5	146	129	71	64	76
90	Flox	23.1	23.1	115.5	142	75
	Avg	23.01			148.7	115.222	77.5	71.25	87.375
	Stdev	1.48657			13.4911	18.1299	23.5372	14.39	14.1213
	SEM	0.470095			4.26628	5.73319	7.44312	4.55051	4.46554
39	KO	21.7	21.7	108.5	146	122	72	69	80
40	KO	22.8	22.8	114	140	107	88	64	93
41	KO	22.7	22.7	113.5	133	81	69	72	83
42	KO	22	22	110	114	75	70	63	95
70	KO	23.5	23.5	117.5	145	101	67	85	95
72	KO	23.7	23.7	118.5	124	99	63	50	68
73	KO	22	22	110	141	110	78	88	81
74	KO	21.6	21.6	108	138	118	61	75	95
82	KO	24	24	120	136	122	80	68	72
84	KO	24	24	120	147	120	84	114	120
	Avg	22.8			136.4	105.5	73.2	74.8	88.2
	Stdev	0.949854			10.4478	16.7548	8.97899	17.555	14.8683
	SEM	0.30037			3.30387	5.29832	2.83941	5.55138	4.70177
	t test	0.710993			0.0350525	0.240973	0.600394	0.651241	0.906314

## Sheet: Liver TG
Liver triglycerides
Application: Tecan i-control				Tecan i-control , 1.12.4.0
Device: infinite 200				Serial number: 812001435
Firmware: V_2.11_04/08_InfiniTe (Apr 4 2008/14.37.11)				MAI, V_2.11_04/08_InfiniTe (Apr 4 2008/14.37.11)						µg/µl Triolein
										2.5	0.953
Date:	2019-02-14									1.25	0.5452
Time:	5:47:53 PM									0.625	0.3315
										0.312	0.2321
										0.156	0.1834
System				HSPH-F7QMJB2						0.0781	0.1571
User				HSPH-F7QMJB2\FareseWalther						0.039	0.1463
Plate										0	0.1359
Plate-ID (Stacker)
Label: Label1
Mode				Absorbance						TG in micrograms						µg TG/mg proein
Wavelength				492	nm					Licer		Avg	µg/µl TG	µg TG in 200 µl Triton	µg TG in 1 ml Chloroform	Total proein (mg)	µg TG/mg proein	Avg	Stdev	t -test
Bandwidth				9	nm					Chow	Flox	0.5292	1.20987	241.974	806.579	20.1818	39.9656	29.6515	6.94548
Number of Flashes				25								0.4451	0.953701	190.74	635.801	20.2432	31.4081
Settle Time				0	ms							0.4149	0.861712	172.342	574.475	18.6068	30.8744
Part of Plate				A1-H5								0.3933	0.795918	159.184	530.612	20.4852	25.9022
Start Time:	2/14/2019 5:47:53 PM											0.3443	0.646665	129.333	431.11	22.7659	18.9366
												0.4539	0.980506	196.101	653.67	21.208	30.8219
	Temperature: 28.1 °C										KO	0.9988	2.64027	528.054	1760.18	23.4034		50.6936	14.2547	0.0133741
<>	1	2	3	4	5		chow	200 ul triton				0.7754	1.95979	391.959	1306.53	20.9795	62.2763
A	0.953	0.5292	0.9988	2.1477	2.4878		HFD	600 ul triton				0.7266	1.81115	362.23	1207.43	23.3216	51.7731
B	0.5452	0.4451	0.7754	3.0609	3.1662							0.4593	0.996954	199.391	664.636	21.917	30.3251
C	0.3315	0.4149	0.7266	2.6989	2.7611							0.4039	0.828206	165.641	552.137	26.9216
D	0.2321	0.3933	0.4593	1.6459	2.7774							0.878	2.27231	454.462	1514.87	25.9398	58.3997
E	0.1834	0.3443	0.4039	2.6977	2.4753
F	0.1571	0.4539	0.878	2.7932	2.6321					HFD	Flox	2.1477	6.13981	3683.89	12279.6	24.3034	505.263	621.935	81.3719
G	0.1463	0.048	0.048	0.0479	0.0481							3.0609	8.92141	5352.85	17842.8	25.3602	703.575
H	0.1359	0.048	0.0482	0.0478	0.0479							2.6989	7.81876	4691.26	15637.5	23.0182	679.355
	blank											1.6459	4.61133	2766.8	9222.66	20.8023
												2.6977	7.81511	4689.06	15630.2	24.15	647.214
												2.7932	8.106	4863.6	16212	28.2307	574.269
End Time:	2/14/2019 5:48:29 PM										KO	2.4878	7.17575	4305.45	14351.5	19.067	752.687	736.343	30.0377	0.0104988
												3.1662	9.24216	5545.29	18484.3	26.6386	693.891
												2.7611	8.00822	4804.93	16016.4	22.0295	727.044
												2.7774	8.05787	4834.72	16115.7	22.0432	731.099
												2.4753	7.13768	4282.61	14275.4	19.575	729.265
												2.6321	7.61529	4569.17	15230.6	19.425	784.071

## Sheet: Sk. muscle TG
Sk. Muscle triglycerides
Application: Tecan i-control				Tecan i-control , 1.12.4.0
Device: infinite 200				Serial number: 812001435
Firmware: V_2.11_04/08_InfiniTe (Apr 4 2008/14.37.11)				MAI, V_2.11_04/08_InfiniTe (Apr 4 2008/14.37.11)					µg/µl Triolein
									2.5	0.929
Date:	2021-02-03								1.25	0.4852
Time:	4:22:15 PM								0.625	0.3124
									0.312	0.2192
									0.156	0.1818
System				HSPH-F7QMJB2					0.0781	0.1493
User				HSPH-F7QMJB2\FareseWalther					0.039	0.137
Plate									0	0.1318
Plate-ID (Stacker)
Label: Label1							TG in micrograms					µg TG/mg proein
Mode				Absorbance			Sk.muscle		µg/µl TG	µg TG in 200 µl Triton	µg TG in 1 ml Chloroform	Total proein (mg)	µg TG/mg proein	Avg	Stdev	t -test
Wavelength				492	nm		D1D2 flox	0.2097	0.276212	55.2423	276.212	14.7	18.7899	21.4096	3.56621
Bandwidth				9	nm		D1D2 flox	0.2155	0.294583	58.9167	294.583	13.5	21.821
Number of Flashes				25			D1D2 flox	0.2114	0.281596	56.3193	281.596	16.2	17.3825
Settle Time				0	ms		D1D2 flox	0.2608	0.438074	87.6148	438.074	16.5	26.5499
Part of Plate				A1-H5			D1D2 flox	0.2447	0.387076	77.4153	387.076	17.2	22.5044
Start Time:	2/3/2021 4:22:15 PM						A-DGAT DKO	0.1881	0.207792	41.5584	207.792	8.1	25.6534	20.0378	4.28794
							A-DGAT DKO	0.1789	0.178651	35.7301	178.651	11.3	15.8098
	Temperature: 23.1 °C						A-DGAT DKO	0.1567	0.108331	21.6661	108.331	6.8	15.931
<>	1	2	3	4	5		A-DGAT DKO	0.1914	0.218245	43.649	218.245	9.6	22.7339
A	0.929	0.2182	0.197	0.1881	0.2097		A-DGAT DKO	0.1757	0.168514	33.7029	168.514	8.4	20.0612
B	0.4852	0.2173	0.1818	0.1789	0.2155
C	0.3124	0.221	0.1872	0.1567	0.2114
D	0.2192	0.2559	0.1717	0.1914	0.2608
E	0.1818	0.2522	0.1315	0.1757	0.2447
F	0.1493	0.1474	0.1291	0.1308	0.1545
G	0.137	0.1291	0.1303	0.1331	0.1548
H	0.1318	0.1235	0.1254	0.1261	0.1464
End Time:	2/3/2021 4:22:51 PM
