# Supplementary material for: Mice lacking triglyceride synthesis enzymes in adipose tissue are resistant to diet-induced obesity
Source: eLife journal article supplement (doi:10.7554/elife.88049), 2023-05-11
Supplement: data1 [file Figure 4 -source data 1.xlsx]

## Sheet: Body weights_male mice
Body weights-male mice on HFD
Mouse #	Genotype	2018-07-13	2018-07-22	2018-07-28	2018-08-04	2018-08-11	2018-08-25	2018-09-02	2018-09-09	2018-09-16	2018-09-25	2018-10-01	2018-10-06	13/10
1 (RR)	Flox	17.8	20.5	22.2	24.3	25.6	27.6	31.2	33.3	34.3	37.1	37	37	38
3 (RLL)	Flox	19.5	23.4	25.1	27.2	30.5	33.8	36.6	37.9	40	42.8	43.6	44.8	46.8
7 (2R)	Flox	19.2	21.3	22.3	24.3	25.4	28.4	30.6	32	33.6	36.2	36.2	37.5	39.3
8 (R)	Flox	20.9	24.7	27	31.4	33.7	37.6	40	42	43.6	47.3	49.1	50	51.5
10 (RL)	Flox	20.3	23.7	26.6	30.2	32.5	35	37.5	40	41.3	44.4	46	47.7	49.2
11 (2R)	Flox	22.5	25.2	26.3	28.6	31.2	34.2	36.5	38.2	39.9	42.3	43.7	45.5	47.3
14 (2R)	Flox	20	23.2	24.1	25.5	27.1	29.5	33.4	34.2	35.4	38.4	38.4	40	40
15 (R)	Flox	19.1	22.8	25.1	27.6	30	34.1	36.2	37.8	39.6	42	42.7	43.8	45.5
16 (L)	Flox	19.2	23.3	25.5	27.8	29.9	33.9	36.5	38.1	39.2	42	42.4	43	45
17 (RL)	Flox	19.2	22.3	24.7	27.4	29.2	32.9	35.2	36.4	38	42	42.4	43.8	44.6
21 (R)	Flox	20.3	25.6	27.7	30.5	34.6	38.5	40.6	42.7	44.1	46.2	46	47.8	48.7
22 (L)	Flox	19.7	22.5	25	26.7	30.2	34	36.7	37.8	39	41.6	42	44	44
23 (RL)	Flox	20.1	24.8	26	27.8	30.5	34.6	37.8	40	42.2	45	45	46	47.1
24 (2R)	Flox	20.6	25.1	26.8	28.6	31.4	35	39.3	40	42.3	43.5	44.4	46.1	46.7
34 (L)	Flox	17.7	20.4	21.1	22.3	34.4	26.9	28.4	30	30.4	31.6	32.2	33	34.2
	Avg	19.74	23.2533	25.0333	27.3467	30.4133	33.0667	35.7667	37.36	38.86	41.4933	42.0733	43.3333	44.5267
	Stdev	1.18912	1.66127	1.91373	2.47873	2.82106	3.45164	3.49973	3.61718	3.91587	4.12786	4.39959	4.61437	4.71009
	SEM	0.307029	0.428937	0.494124	0.640005	0.728395	0.891209	0.903626	0.933952	1.01107	1.06581	1.13597	1.19142	1.21614
2 (LL)	KO	18.2	21.3	22.7	23.5	25.1	27	28.7	29.2	30	30.6	30.4	31.8	32
4 (RRL)	KO	19.3	22.3	22.8	23.8	25.3	26.9	27.8	28.5	29	29.6	29.9	30.4	30.8
5 (R)	KO	18.3	22.2	22.4	24.4	25.3	27.7	28.8	28.5	28.9	29.4	30.2	30.8	31.3
6 (L)	KO	19.6	22	22.5	24.6	25.7	27.6	28.7	30	30.2	30.8	30.6	30.5	31.8
9 (L)	KO	22.4	24.4	27.1	29.6	30.9	33.3	35.6	36.6	36.9	38.2	38	38.7	40
12 (R)	KO	21.5	24	24.5	25.8	27	29	30.5	31.6	31.8	32.2	32.7	32.9	33.9
13 (L)	KO	20.4	23.2	24	24.3	25	27	28	28.6	29.6	30	30.3	30.6	31
18 (R)	KO	19.8	22.9	24.4	25.5	27.1	28.8	30.8	31.5	32.3	32.8	33.1	32.3	34.1
19 (L)	KO	20.2	22.5	22.5	26.4	28	29.5	31.1	31.7	32.4	33	33	33.2	33.1
20 (RL)	KO	19.4	20.4	22.4	24.7	25.3	27.9	30.1	31.2	32	33.1	33	34.1	33.7
29 (RR)	KO	19	21.6	22.5	24.2	25.3	27.2	28.6	28.5	29.2	30	29.4	30.6	30
31 (RLL)	KO	18.9	21.3	22	23.6	25.2	26.8	27.3	28.5	28.6	29.2	29.5	30.9	31.4
32 (RRL)	KO	19.5	22.7	24.8	26.6	27.7	30.6	32.5	32.6	33	33	33.7	33	33
33 (R)	KO	18.2	21	22.3	23	24.2	25.8	27.4	28.4	29	30.1	30.8	30.9	31.2
35 (RL)	KO	19.8	21.8	23.4	24.2	25.3	27.1	29.3	30.2	30.5	31.7	31.8	33.1	33.1
	Avg	19.6333	22.24	23.3533	24.9467	26.16	28.1467	29.68	30.3733	30.8933	31.58	31.76	32.2533	32.6933
	Stdev	1.16843	1.09401	1.37937	1.65955	1.71039	1.88258	2.20946	2.26099	2.22308	2.31677	2.25636	2.16329	2.37681
	SEM	0.301688	0.282472	0.356152	0.428493	0.44162	0.486079	0.57048	0.583786	0.573997	0.598188	0.582589	0.558558	0.61369
	t-test	0.806093	0.0584382	0.0101228	0.00420699	2.82489e-05	4.21877e-05	4.16288e-06	7.29964e-07	1.90974e-07	7.86317e-09	8.5191e-09	3.70262e-09	1.9547e-09

## Sheet: Body weights_female mice
Body weights-female mice on HFD
Mouse #	Genotype	2018-07-13	2018-07-22	2018-07-28	2018-08-04	2018-08-11	2018-08-24	2018-09-02	2018-09-09	2018-09-16	2018-09-25	2018-10-01	2018-10-06
1 (R)	Flox	17	19.3	20.3	20.8	22.1	23.3	25.8	29.5	29	29.1	31.3	34.7	36.7
3 (2R)	Flox	18.2	22	23.8	25.4	26	31	33.3	34	35.3	38	40.3	41.9	43
6 (RL)	Flox	19	22	22.4	25.8	26.6	31.7	36.7	36	37	42.3	42.4	45	45
7 (2R)	Flox	18.4	20.5	21.7	24.2	28	28	33	33.7	36.9	36	36	39.4	39.3
9 (R)	Flox	19.7	20.5	21.4	24.6	23.4	28.1	28.7	29.1	29.8	27.5	29	30.5	34.1
11 (RL)	Flox	18	19.4	21.4	22.2	23.5	25.8	30	29	29.5	33.2	33.3	33.2	35.6
14 (L)	Flox	17.5	18.8	19.7	21.2	23.4	24.7	25.2	25.4	26.6	28.7	30.4	34	34.1
15 (RL)	Flox	19.3	21.4	24	25.2	28.8	32.7	37.1	40	40.9	44.3	46.8	48.2	50.5
24 (R)	Flox	18.1	19.5	20.8	22.9	23.3	25.3	25.5	26.1	27.6	32	32	31.2	33.6
25 (L)	Flox	19	20.6	21.7	22.2	23	26.3	26.4	27.4	31	29	30.8	33	33.8
26 (RL)	Flox	18.3	19.8	20.2	20.9	22.4	23.5	24.7	24	26	27.6	28.1	29.8	28.9
	Avg	18.4091	20.3455	21.5818	23.2182	24.5909	27.3091	29.6727	30.3818	31.7818	33.4273	34.5818	36.4455	37.6909
	Stdev	0.793038	1.09942	1.38695	1.88935	2.33643	3.28312	4.66564	4.95254	4.94162	5.96927	6.07582	6.23127	6.23353
	SEM	0.204762	0.283869	0.35811	0.487828	0.603264	0.847699	1.20466	1.27874	1.27592	1.54126	1.56877	1.60891	1.60949
5 (L)	KO	19.6	20.8	23	23.2	25.4	25.8	29.3	28.1	28.7	29.9	29.8	29.8	30.8
8 (2RL)	KO	17.6	18.8	20.1	21	22.5	22.8	25	26.1	25.6	26.4	26.7	28.6	28.6
10 (L)	KO	19.2	21.3	22.5	23.5	24.6	25.8	27	27.9	27.4	29.3	28.1	29.8	29.8
13 (R)	KO	18.9	19.2	20.4	21	21.7	23	29.3	24.6	25.3	26.8	26.9	27.9	27.5
16 (2R)	KO	16.6	18.2	20.2	21	23.3	23.5	24.7	25.5	25.3	26.3	27.3	27.5	28
20 (2R)	KO	16.8	17.8	18.8	20.2	21.2	23.1	23.9	24.6	24.9	26.2	26.4	26.5	27.5
21 (R)	KO	18.2	18.8	19.9	20.9	21.1	22.3	24	23.8	23.7	24.3	24.4	26	26
23 (2R)	KO	17.3	18.1	19.3	20.5	21.2	22.2	23.1	24.6	24.7	24.2	24.4	26.2	26.1
27 (2R)	KO	18	19.9	21	22.2	23	25.7	25.5	27	27	27.1	27.3	28.2	32
33 (L)	KO	17.8	19.6	21.1	22.1	23.2	24.6	25	27	26.8	27.6	27.6	27.6	28
	Avg	18	19.25	20.63	21.56	22.72	23.88	25.68	25.92	25.94	26.81	26.89	27.81	28.43
	Stdev	0.996661	1.15878	1.31829	1.13058	1.47934	1.4612	2.17348	1.5252	1.49755	1.83694	1.61414	1.35109	1.93509
	SEM	0.257337	0.299196	0.340381	0.291916	0.381964	0.377281	0.561189	0.393804	0.386667	0.474295	0.416769	0.34885	0.499637
	t-test	0.308779	0.038564	0.124359	0.0263727	0.0432779	0.00680439	0.0231889	0.0133534	0.00197811	0.00331057	0.00102474	0.000402313	0.000247446

## Sheet: DEXA
DEXA - male mice - HFD
Mouse #	Genotype	Weight (gm)	Lean	Fat	% fat
1	D1D2 flox	37	19.3	11	36.4
8 (R)	D1D2 flox	49.1	23.9	18.2	43.3
10 (RL)	D1D2 flox	46	24.5	15.1	38.1
11 (2R)	D1D2 flox	43.7	27.4	11.9	30.3
15 (R)	D1D2 flox	42.7	21.7	14.8	40.6
16 (L)	D1D2 flox	42.4	21.1	15.4	42.3
17 (RL)	D1D2 flox	42.4	22.5	14.9	39.7
21 (R)	D1D2 flox	46	23.2	17.9	43.5
23 (RL)	D1D2 flox	45	23.9	15.7	39.7
24 (2R)	D1D2 flox	44.4	22.8	16.2	41.6
	Avg	43.87	23.03	15.11	39.55
	Stdev	3.17807	2.17412	2.26787	3.94638
2 (LL)	ADGAT DKO	30.4	19.9	5.2	20.6
4 (RRL)	ADGAT DKO	29.9	19.7	4.5	18.5
9 (L)	ADGAT DKO	38	25.7	5	16.3
12	ADGAT DKO	32.7	22.5	5.4	19.4
18 (R)	ADGAT DKO	33.1	21.8	5.3	19.5
19 (L)	ADGAT DKO	33	21.3	4.4	17.2
20 (RL)	ADGAT DKO	33	21	5.7	21.5
29 (RR)	ADGAT DKO	29.4	19.8	4.3	17.9
31 (RLL)	ADGAT DKO	29.5	20.9	4	16.1
32 (RRL)	ADGAT DKO	33.7	22.5	5.6	20
	Avg	32.27	21.51	4.94	18.7
	Stdev	2.6213	1.79719	0.596657	1.8172
	t-test	4.41912e-06	0.0280566	3.09135e-07	9.65273e-08

## Sheet: GTT
Glucose tolerance test (GTT)
Mouse #	Genotype	Weight (gm)	Glucose(mg)	Glucose (µl)	Diluted	0	15	30	60	120
1 (R)	Flox	35	69	139	278	180	399	451	276	176													0
3 (2R)	Flox	42	84	168	335	171	350	400	310	195													15
6 (RL)	Flox	45	90	180	360	178	302	300	220	185													30
7 (2R)	Flox	39	79	158	315	160	320	333	244	175													60
9 (R)	Flox	31	61	122	244	161	322	356	310	180													120
11 (RL)	Flox	33	66	133	266	160	310	300	311	220
14 (L)	Flox	34	68	136	272	172	410	302	262	214
24 (R)	Flox	31	62	125	250	160	313	314	252	197
25 (L)	Flox	33	66	132	264	172	330	388	281	211
26 (RL)	Flox	30	60	119	238	175	371	306	232	184
	Avg	35.3				168.9	342.7	345	269.8	193.7
	Stdev	5.05635				7.93655	38.3929	52.4468	33.4092	16.4523
	SEM	1.59896				2.50976	12.1409	16.5851	10.5649	5.20267
5 (L)	KO	30	60	119	238	115	219	233	171	129
8 (2RL)	KO	29	57	114	229	129	233	173	170	131
10 (L)	KO	30	60	119	238	125	229	210	180	138
13 (R)	KO	28	56	112	223	142	221	176	170	151
16 (2R)	KO	28	55	110	220	140	210	240	203	137
20 (2R)	KO	27	53	106	212	139	240	193	184	144
21 (R)	KO	26	52	104	208	140	212	175	170	145
23 (2R)	KO	26	52	105	210	130	200	206	193	138
27 (2R)	KO	28	56	113	226	150	250	239	180	152
33 (L)	KO	28	55	110	221	180	300	227	240	159
	Avg	28				139	231.4	207.2	186.1	142.4
	Stdev	1.41421				17.5309	28.3165	26.9477	21.9163	9.59398
	SEM	0.447214				5.54377	8.95445	8.52161	6.93053	3.03388
	t test	0.000347964				0.000112022	7.61183e-07	7.43754e-07	3.21948e-06	9.91842e-08

## Sheet: ITT
Insulin tolerance test (ITT)
Mouse #	Genotype	Weight (gm)	Weight (gm)	Lean	Insulin (ul)	Diluted	0	15	30	60	120	180
1	Flox	37	38	19.3	19.3	96.5	178	148	113	81	111	150
8 (R)	Flox	49.1	51.5	23.9	23.9	119.5	187	144	125	120	128	130
10 (RL)	Flox	46	49.2	24.5	24.5	122.5	203	123	131	116	136	140
11 (2R)	Flox	43.7	47.3	27.4	27.4	137	180	145	115	85	126	136
15 (R)	Flox	42.7	45.5	21.7	21.7	108.5	210	147	120	113	136	145
16 (L)	Flox	42.4	45	21.1	21.1	105.5	184	142	125	118	134	140
17 (RL)	Flox	42.4	44.6	22.5	22.5	112.5	188	161	132	118	137	153
21 (R)	Flox	46	48.7	23.2	23.2	116	179	145	127	108	116	136
23 (RL)	Flox	45	47.1	23.9	23.9	119.5	186	147	125	107	121	135
24 (2R)	Flox	44.4	46.7	22.8	22.8	114	188	160	140	119	130	142
	Avg	43.87	46.36	23.03			188.3	146.2	125.3	108.5	127.5	140.7
	Stdev	3.17807	3.60685	2.17412			10.4035	10.4222	8.04225	14.1833	9.02158	7.07185
	SEM						3.28988	3.29579	2.54318	4.48516	2.85287	2.23632
2 (LL)	KO	30.4	32	19.9	19.9	99.5	145	142	112	105	102	131
4 (RRL)	KO	29.9	30.8	19.7	19.7	98.5	158	137	109	85	96	154
9 (L)	KO	38	40	25.7	25.7	128.5	143	114	92	90	95	110
12	KO	32.7	33.9	22.5	22.5	112.5	160	137	113	85	121	120
18 (R)	KO	33.1	34.1	21.8	21.8	109	170	139	116	81	100	124
19 (L)	KO	33	33.1	21.3	21.3	106.5	170	145	126	96	112	130
20 (RL)	KO	33	33.7	21	21	105	180	149	116	58	123	120
29 (RR)	KO	29.4	30	19.8	19.8	99	136	116	90	85	90	120
31 (RLL)	KO	29.5	31.4	20.9	20.9	104.5	146	134	121	91	121	146
32 (RRL)	KO	33.7	33	22.5	22.5	112.5	158	143	105	96	111	125
	Avg	32.27	33.2	21.51			156.6	135.6	110	87.2	107.1	128
	Stdev						14.057	11.7019	11.6046	12.4704	12.0964	13.1403
	SEM						4.44522	3.70045	3.6697	3.94349	3.82521	4.15532
	t test						1.95956e-05	0.0463845	0.00300749	0.00220557	0.000455653	0.0149242
