# Supplementary material for: Mice lacking triglyceride synthesis enzymes in adipose tissue are resistant to diet-induced obesity
Source: eLife journal article supplement (doi:10.7554/elife.88049), 2023-05-11
Supplement: data1 [file Lipidomics.xlsx]

## Sheet: TG_species
uM per ug protein level		D1D2 flox								ADGAT DKO								Average			Stdev
		F1	F2	F3	F4	F5	F6	F7	F8	K1	K2	K3	K4	K5	K6	K7	K8	D1D2 flox	ADGAT DKO		D1D2 flox	ADGAT DKO	t test
LipidMolec	Class	[s1]	[s2]	[s3]	[s4]	[s5]	[s6]	[s7]	[s8]	[s9]	[s10]	[s11]	[s12]	[s13]	[s14]	[s15]	[s16]
TG(16:0/18:1/18:3)	TG	1046.18	776.738	1121.41	1361.79	613.084	886.306	879.906	1029.93	57.4102	67.3565	91.7931	76.8964	29.9139	125.932	128.964	91.0917	964.417	83.6697	158.972	228.483	33.4876	3.62369e-08
TG(18:1/18:2/18:2)	TG	995.015	772.225	1062.56	1152.18	695.903	855.858	922.169	929.628	29.5384	26.0568	41.6619	28.9532	16.533	51.1206	49.372	37.0433	923.192	35.0349	66.5663	149.305	11.9665	1.15233e-10
TG(16:0/18:1/18:2)	TG	942.081	683.804	1004.56	1200.13	578.945	759.178	810.592	914.118	53.3753	50.6302	72.662	60.8248	26.2101	120.705	109.419	74.3117	861.676	71.0173	134.933	195.987	31.1576	2.08654e-08
TG(18:0/18:1/18:3)	TG	547.159	825.88	603.121	695.32	454.637	486.987	617.571	550.254	7.52385	9.14354	17.0691	11.9383	5.16266	28.0167	17.1683	15.4027	597.616	13.9282	26.4635	119.254	7.2282	1.49935e-09
TG(18:1/18:1/18:2)	TG	567.479	502.197	649.45	717.796	410.856	501.248	595.044	565.949	27.9157	11.8868	22.9131	15.5693	10.5011	36.7916	25.7064	33.8382	563.752	23.1403	43.9665	94.9771	9.8122	2.13508e-10
TG(18:0/18:1/18:2)	TG	509.022	444.698	599.27	630.656	436.54	474.3	877.981	473.544	7.87472	6.72705	14.8704	9.83296	3.96459	30.7597	19.9764	13.9988	555.751	13.5006	25.6511	148.062	8.65082	6.15696e-08
TG(16:0/18:1/18:1)	TG	449.002	347.919	512.027	712.748	301.563	388.47	400.868	502.426	18.598	14.0496	23.9793	25.1254	6.81804	62.6112	61.3029	32.3814	451.878	30.6082	58.1556	127.76	20.798	2.5797e-07
TG(18:3/18:2/18:2)	TG	432.643	367.559	499.633	659.262	219.455	409.031	399.52	514.592	3.57443	4.78354	8.2821	6.29967	2.02954	12.6	9.72918	8.76748	437.712	7.00824	13.3157	127.444	3.49324	1.63625e-07
TG(16:1/18:1/18:3)	TG	412.219	212.028	447.888	615.512	151.967	332.911	309.315	488.031	11.3395	13.0112	17.8376	19.0442	5.89397	37.392	35.0667	21.1108	371.234	20.087	38.1653	150.995	11.0781	1.26992e-05
TG(16:0/16:1/18:2)	TG	378.25	248.132	386.036	555.896	187.766	301.764	289.483	431.288	23.8369	22.6815	33.9572	35.2108	11.2588	76.4217	73.1553	36.0102	347.327	39.0665	74.2264	115.713	23.5476	3.43784e-06
TG(18:1/18:1/18:1)	TG	269.36	266.936	418.887	438.707	226.331	219.783	355.428	397.112	7.83963	4.29551	10.0685	7.53625	2.85156	19.8696	15.6318	10.5872	324.068	9.83501	18.6865	88.7506	5.65228	9.40926e-08
TG(14:0/18:2/18:2)	TG	331.88	212.195	352.222	507.578	159.316	263.442	260.602	411.971	13.1136	21.8215	21.3842	25.8176	4.13088	48.3503	54.0815	30.9246	312.401	27.453	52.1608	112.459	16.8124	5.43963e-06
TG(18:0/16:0/18:2)	TG	298.432	259.498	382.546	359.74	281.254	255.305	312.011	266.815	8.07866	11.2655	17.4695	14.2662	4.21025	22.4762	29.7095	18.025	301.95	15.6876	29.8064	47.1922	8.12877	1.03389e-10
TG(16:0/18:1/20:1)	TG	300.099	226.82	300.237	380.653	231.941	233.257	314.514	301.734	2.27623	1.50472	3.85841	3.43964	0.926331	22.4216	10.363	7.16099	286.157	6.49386	12.3383	52.9521	7.16199	6.05962e-10
TG(16:0/18:2/18:3)	TG	279.363	215.287	298.672	418.274	148.569	238.944	228.93	298.391	8.78039	11.6675	17.5539	18.7863	4.80551	37.6104	32.5156	24.8721	265.804	19.574	37.1906	79.2377	11.481	5.10145e-07
TG(18:0/16:0/18:1)	TG	187.874	188.794	270.033	262.743	181.76	154.863	244.429	237.747	2.69508	2.53904	5.00104	4.23236	0.982644	22.3124	11.6895	7.86954	216.03	7.1652	13.6139	42.8068	7.00302	1.81262e-09
TG(16:0/16:0/18:2)	TG	222.261	184.03	260.045	262.623	163.742	188.023	201.108	204.5	35.7224	47.0614	53.4303	51.5131	17.0602	98.0927	95.4668	63.2265	210.791	57.6967	109.624	35.5076	27.7559	1.52953e-07
TG(16:0/16:0/18:1)	TG	232.889	147.091	216.243	268.272	162.003	154.513	180.602	188.34	16.4051	20.3295	26.6548	27.5958	6.52513	55.8015	54.5917	34.5137	193.744	30.3022	57.5741	42.2881	17.4703	8.22143e-08
TG(18:0/18:1/18:1)	TG	149.112	159.543	207.819	206.012	198.355	137.714	215.259	162.615	0.5934	0.483943	1.36633	3.67582	0.39986	23.7862	11.0871	7.55963	179.554	6.11904	11.6262	30.4536	8.12791	3.12209e-10
TG(16:1/18:2/18:3)	TG	172.557	119.01	167.266	292.792	59.5303	146.989	120.337	269.973	3.74548	5.44786	8.59994	7.95433	1.80107	17.1539	12.4234	9.41908	168.557	8.31814	15.8045	78.2571	4.89852	4.76579e-05
TG(16:0/16:1/16:1)	TG	140.671	97.8653	151.743	225.724	90.1687	117.941	122.166	168.187	8.20365	12.4114	13.6151	15.6779	4.45591	32.2745	31.6915	19.7202	139.308	17.2563	32.7869	43.6557	10.1771	2.12694e-06
TG(20:0/18:1/18:2)	TG	122.436	108.897	176.773	179.209	82.4242	121.266	117.931	149.428	0.364241	0.274328	0.858787	0.472509	0.205032	2.56149	1.05259	0.983494	132.295	0.846559	1.60846	33.6631	0.766615	2.70153e-08
TG(18:2/14:1/18:2)	TG	137.545	77.4147	112.911	255.171	36.3441	100.442	77.3528	143.298	2.44728	4.47825	3.36353	6.46934	0.904788	17.5497	11.8681	8.55823	117.56	6.9549	13.2143	65.6153	5.54398	0.000309964
TG(16:1/16:1/16:1)	TG	111.703	61.3601	116.124	199.041	42.7136	87.0907	74.4551	157.786	3.41874	3.27645	4.35328	6.84805	1.27385	21.3981	17.2174	10.1727	106.284	8.49481	16.1401	51.8559	7.27419	0.000115876
TG(20:1/18:1/18:1)	TG	92.6764	71.5896	101.19	146.276	54.528	88.8931	93.5646	126.396	0.478272	0.263363	0.806685	0.473052	0.176044	3.82245	1.5987	0.935154	96.8892	1.06921	2.03151	28.9222	1.20115	2.09877e-07
TG(20:1/18:2/18:2)	TG	99.3348	105.471	110.6	115.266	54.4489	89.418	82.0411	94.7273	1.30675	1.07087	2.15854	1.32292	0.668954	3.36119	2.29199	1.80647	93.9133	1.74846	3.32207	19.3339	0.850924	2.09382e-09
TG(18:1/18:2/20:4)	TG	72.2946	53.9889	102.429	171.396	61.4348	58.2792	90.9654	136.333	0.510289	0.385908	0.586405	0.350751	0.250763	3.14421	0.755493	0.64286	93.3902	0.828334	1.57384	41.8637	0.950193	2.11924e-05
TG(20:1/18:1/18:2)	TG	91.0404	75.9773	101.936	145.074	58.2659	86.9682	88.0773	96.9562	1.40872	1.13902	2.21687	1.24758	0.591665	2.62836	2.8591	1.71509	93.0369	1.7258	3.27902	24.9796	0.783769	6.20874e-08
TG(18:3/18:2/20:3)	TG	79.0052	74.7237	107.544	154.208	61.3716	58.6204	83.1194	102.621	0.0815102	0.330225	0.481396	0.237137	0.0780635	0.895908	0.762361	0.70312	90.1517	0.446215	0.847809	31.1574	0.315124	1.11367e-06
TG(18:0/18:0/18:1)	TG	60.322	62.7976	86.4008	114.881	85.6642	56.1619	91.8318	81.2704	0.178064	0.14744	0.32891	0.162209	0.105389	1.28402	0.500588	0.404999	79.9162	0.388952	0.739009	19.5766	0.387685	1.63385e-08
TG(20:1/18:1/18:2)	TG	85.4031	64.795	85.5705	104.965	47.8819	69.8283	67.0616	77.2492	0.832645	0.66561	0.636496	0.290482	0.160681	1.46702	1.29847	0.608426	75.3443	0.744979	1.41546	17.1184	0.450407	6.65608e-09
TG(18:3/18:2/18:3)	TG	74.8997	64.3939	81.3467	137.622	26.9321	72.978	56.4045	87.4649	0.280034	0.438365	0.668884	0.575264	0.154029	1.15356	1.01275	1.03938	75.2552	0.665284	1.26404	31.3722	0.371965	9.71437e-06
TG(18:0/18:1/20:1)	TG	58.9152	50.4621	68.0136	152.045	42.2868	54.2108	63.7595	91.6812	0.105786	0.077891	0.235166	0.117673	0.0509841	1.16134	0.37598	0.267527	72.6718	0.299043	0.568181	35.2727	0.365519	4.57863e-05
TG(16:0/18:1/22:5)	TG	75.1498	47.4534	70.7091	97.0924	55.3261	57.5443	74.7054	77.7042	0.267973	0.241219	0.382421	0.367175	0.275518	1.65125	0.930532	0.696366	69.4606	0.601557	1.14296	15.6707	0.488358	5.99201e-09
TG(16:0/14:0/18:1)	TG	77.0879	56.9725	90.0951	118.367	49.3834	63.0301	68.4575	6.16749	3.95819	5.13827	5.92642	8.31947	1.91049	18.5186	18.695	10.9805	66.1951	9.18087	17.4437	32.5091	6.42275	0.000249478
TG(16:0/18:2/24:1)	TG	76.0771	60.491	76.6296	151.444	26.0549	36.5634	35.0326	56.8178	0.0974965	0.0793959	0.264939	0.0990762	0.0492078	0.281668	0.0776882	0.150848	64.8888	0.13754	0.261326	39.7152	0.0886639	0.000403598
TG(12:0/18:2/18:2)	TG	64.3024	44.0603	62.2976	119.497	27.2719	51.9534	51.023	96.7704	1.105	1.66252	2.54478	3.01613	0.424993	7.31601	3.7755	3.70565	64.647	2.94382	5.59326	29.7933	2.13542	4.2721e-05
TG(16:0/18:2/22:6)	TG	60.4574	51.0471	84.8124	79.1235	64.4931	45.8552	58.5321	55.6662	0.572348	0.485663	0.588819	0.295097	0.372838	0.794649	2.39599	0.773578	62.4984	0.784873	1.49126	13.379	0.673871	3.22731e-09
TG(18:2/18:2/22:6)	TG	53.3926	48.8909	77.857	71.2748	47.1311	40.6143	46.6812	48.5895	0.202449	0.194351	0.203985	0.139404	0.143315	0.244549	0.20781	0.247529	54.3039	0.197924	0.376056	13.1067	0.040016	1.328e-08
TG(16:0/18:2/19:0)	TG	44.8377	42.673	63.3927	73.7869	47.2734	43.0729	57.8485	52.1464	0.210256	0.171132	0.410987	0.223291	0.0960345	5.11206	1.88069	0.534922	53.1289	1.07992	2.05185	11.1408	1.72908	3.13932e-09
TG(18:1/18:2/22:6)	TG	50.5166	43.2747	60.998	54.4958	46.6175	31.7688	47.0759	37.0087	0.305471	0.210282	0.24965	0.152028	0.215237	0.336392	0.363225	0.314676	46.4695	0.26837	0.509903	9.32044	0.072927	1.23997e-09
TG(18:3/18:2/20:4)	TG	48.2034	47.7543	51.8886	70.9623	26.0707	34.551	37.9688	51.97	0.127912	0.0993901	0.122914	0.173475	0.0800099	0.198423	0.173351	0.416654	46.1711	0.174016	0.330631	13.5956	0.105974	1.60779e-07
TG(16:0/12:0/18:2)	TG	39.0441	27.0697	46.8947	71.4791	26.8689	33.7461	35.5236	52.2858	1.67099	2.56484	3.31525	4.98978	0.856034	11.9259	9.9313	6.21008	41.614	5.18302	9.84773	14.9679	3.97321	1.08935e-05
TG(18:0/16:0/16:0)	TG	37.3352	33.6386	47.2918	56.3588	37.5374	34.6648	43.4947	39.1818	0.310077	0.360539	0.613965	0.452012	0.174268	2.14799	1.13736	0.853968	41.1879	0.756273	1.43692	7.60143	0.64353	5.13166e-10
TG(16:0/18:1/22:6)	TG	38.9503	31.5409	46.5698	55.5295	36.5179	29.0827	35.7642	38.4017	0.407222	0.269168	0.275198	0.224242	0.234323	0.588856	0.575745	0.387385	39.0446	0.370267	0.703508	8.46413	0.146738	3.59744e-09
TG(18:1/18:2/22:4)	TG	32.0626	26.8524	33.6337	49.4717	30.2907	22.8882	21.5356	31.7429	0.154271	0.106893	0.0890974	0.0868732	0.0876632	0.39248	0.415423	0.213095	31.0597	0.193224	0.367126	8.64271	0.137184	8.25554e-08
TG(16:1/18:3/18:3)	TG	26.9464	18.378	28.5676	58.0896	10.1786	30.9463	19.485	51.4406	0.400205	0.735052	1.03541	1.05822	0.24037	2.02517	1.48371	1.26241	30.504	1.03007	1.95713	16.4642	0.580421	0.00017399
TG(16:0/16:0/16:0)	TG	28.1447	23.6097	36.594	43.5101	24.9327	26.5279	26.6571	30.4149	1.58832	2.46379	2.90487	2.54376	0.770808	3.80607	4.7547	3.16	30.0489	2.74904	5.22318	6.75428	1.23736	2.14401e-08
TG(18:3/18:2/18:2)	TG	28.1759	26.6769	28.5556	54.6641	17.7967	21.2521	21.5548	29.0126	0.213041	0.179409	0.219877	0.499385	0.126043	1.15192	0.433084	0.356129	28.4611	0.397361	0.754986	11.3614	0.331519	6.41331e-06
TG(18:3/14:1/18:2)	TG	26.4983	19.1719	22.948	54.1352	1.81681	26.1517	22.2383	44.0203	0.462922	0.535326	0.669689	1.77411	0.195773	1.91054	2.87872	2.172	27.1226	1.32489	2.51728	15.8629	0.98179	0.000419549
TG(18:0/18:2/20:0)	TG	20.3713	18.6872	41.4796	38.9668	16.0897	22.302	23.9231	29.1611	0.0524762	0.0376233	0.153934	0.0400567	0.0310667	0.281259	0.081868	0.104296	26.3726	0.0978225	0.185863	9.39605	0.0849936	1.56416e-06
TG(16:0/14:0/16:1)	TG	26.2795	15.8874	28.2066	47.7409	13.308	20.9196	21.7377	33.5818	0.841636	1.03281	1.25609	2.07817	0.420269	8.10206	6.30689	3.46594	25.9577	2.93798	5.58217	10.9702	2.83416	5.05548e-05
TG(18:1/18:2/22:1)	TG	25.4667	21.8463	31.5399	32.6205	12.7232	28.1728	22.4886	29.0683	0.101488	0.0698074	0.257495	0.109596	0.0562941	0.514209	0.21507	0.222101	25.4908	0.193257	0.367189	6.46667	0.150173	2.64e-08
TG(18:4/16:1/18:2)	TG	24.3309	16.4808	26.3775	35.6494	10.06	20.0709	14.9026	47.1036	0.177494	0.468034	0.290889	0.449297	0.125684	1.33028	1.28571	0.860061	24.372	0.623432	1.18452	12.0902	0.478974	7.13614e-05
TG(18:1/18:2/22:5)	TG	19.5585	19.9074	25.6675	23.5339	26.8135	16.44	27.5813	19.2984	0.101817	0.100035	0.113559	0.0668517	0.0695031	0.190099	0.191954	0.144756	22.3501	0.122322	0.232412	4.10047	0.0489991	3.81102e-10
TG(16:0/18:1/24:1)	TG	16.2241	14.1742	27.4726	30.8537	7.47744	15.6175	15.2684	35.6156	0.0575856	0.0319906	0.107001	0.0284646	0.0181732	0.162669	0.0404238	0.0585911	20.3379	0.0631124	0.119914	9.73346	0.0486857	3.92514e-05
TG(18:1/18:2/21:0)	TG	15.8594	13.0209	29.8071	33.1614	10.2418	17.6911	17.5115	24.9541	0.0410731	0.0237994	0.0510565	0.0286817	0.0197285	0.186141	0.0404238	0.0644185	20.2809	0.0569153	0.108139	8.15838	0.0542344	6.13727e-06
TG(18:0/18:1/20:4)	TG	19.1209	13.1629	22.6832	23.7142	15.5523	10.9716	20.852	21.9452	0.0984394	0.0597888	0.095575	0.0521104	0.0694087	0.510388	0.129376	0.122904	18.5003	0.142249	0.270272	4.72566	0.151372	2.89265e-08
TG(18:0/16:0/18:0)	TG	12.1707	13.5975	18.1345	23.606	23.0914	11.6541	19.5909	15.3328	0.0623662	0.0636372	0.0837463	0.0438031	0.0523636	0.20088	0.103159	0.082854	17.1472	0.0866012	0.164542	4.70302	0.0499636	6.79262e-08
TG(18:1/18:2/24:1)	TG	13.1606	11.2491	22.9961	28.7383	7.77616	15.1101	14.7293	20.8029	0.0413362	0.0309156	0.106619	0.0347629	0.0162023	0.176862	0.0492542	0.0618756	16.8203	0.0647284	0.122984	6.86154	0.0528062	7.24645e-06
TG(22:5/18:2/18:2)	TG	13.8379	14.4918	20.7458	18.6661	20.9498	13.7014	14.7485	13.1597	0.0775411	0.07888	0.0773291	0.0377627	0.0559162	0.1141	0.0958986	0.11305	16.2876	0.0813098	0.154489	3.28059	0.0263835	1.2969e-09
TG(22:0/18:2/18:2)	TG	13.6816	11.4413	21.7807	25.1806	7.82121	16.2825	13.8147	18.7133	0.0343189	0.0253689	0.0823985	0.0246367	0.0172719	0.106376	0.0346938	0.0659945	16.0895	0.0488824	0.0928766	5.64297	0.0322381	1.29233e-06
TG(16:0/18:3/22:6)	TG	15.8281	12.4943	21.3836	26.3464	10.8819	12.1003	13.3141	14.7942	0.0561603	0.0473624	0.0530682	0.0372197	0.039816	0.125332	0.0862636	0.0742322	15.8929	0.0649317	0.12337	5.32286	0.0295558	7.61308e-07
TG(22:1/18:2/18:2)	TG	14.3902	12.603	24.1152	21.0098	7.92631	15.6613	12.5728	16.5773	0.111268	0.0981216	0.257898	0.119586	0.0539887	0.387158	0.20153	0.214949	15.607	0.180562	0.343069	5.0882	0.107983	6.06364e-07
TG(18:3/18:2/22:6)	TG	15.7656	14.4416	19.6869	25.481	10.0284	12.0303	11.6294	15.0635	0.0346259	0.032528	0.0298936	0.016886	0.0238669	0.0479955	0.0347527	0.041427	15.5158	0.032747	0.0622192	5.00698	0.00966608	4.77733e-07
TG(14:0/18:2/22:6)	TG	14.9112	11.1655	18.2428	24.3152	9.46732	11.9603	11.4369	19.8091	0.057476	0.0680015	0.0440156	0.0442375	0.0373216	0.132237	0.0956042	0.0858471	15.1635	0.0705925	0.134126	5.17494	0.0323925	9.56675e-07
TG(16:0/10:0/18:2)	TG	12.9522	10.2378	13.4174	27.921	7.91841	10.8579	11.716	17.4317	0.137539	0.184268	0.230338	0.364868	0.0914237	1.09651	0.814363	0.557569	14.0566	0.43461	0.82576	6.24741	0.361097	2.4896e-05
TG(18:1/18:2/24:0)	TG	9.47083	9.46059	18.7483	13.4016	7.70741	13.2115	13.1697	21.778	0.0112584	0.000432346	0.0734264	0.013012	0.0117974	0.07417	0.0163579	0.0352156	13.3685	0.0294587	0.0559716	4.81424	0.0290153	1.73958e-06
TG(24:1/18:2/18:2)	TG	10.8369	9.31852	18.0984	21.082	6.59156	12.5903	11.7738	15.1842	0.0468404	0.0391068	0.131463	0.0455949	0.0169903	0.15025	0.0426216	0.0793179	13.1845	0.0690232	0.131144	4.7326	0.047724	1.73626e-06
TG(18:2/18:2/21:0)	TG	14.5777	7.46067	13.4294	17.1516	7.91051	14.2701	12.2551	17.8867	0.0220387	0.0258418	0.0599079	0.0223834	0.0097962	0.118863	0.0405219	0.0461286	13.1177	0.0431852	0.0820519	3.82537	0.0344716	1.41909e-07
TG(18:0/18:1/22:6)	TG	11.1391	11.6419	15.5353	12.6804	17.1012	8.6662	14.2768	9.7792	0.0475421	0.0259278	0.0412797	0.0186777	0.0293659	0.0724368	0.0459575	0.0525519	12.6025	0.0417175	0.0792632	2.88293	0.0170958	6.64558e-09
TG(18:0/16:0/22:6)	TG	8.49759	10.7142	12.1057	14.7958	17.5675	9.5805	15.3935	9.45416	0.0458755	0.0343555	0.0398917	0.0235508	0.0389845	0.0637575	0.0453492	0.0346196	12.2636	0.040798	0.0775163	3.29589	0.0116796	5.15381e-08
TG(16:0/18:1/22:0)	TG	8.7383	8.44935	14.6448	18.6781	7.45136	9.19553	10.5704	15.1935	0.0396696	0.0232405	0.0578158	0.0262113	0.000952031	0.127651	0.0422487	0.0462081	11.6152	0.0454997	0.0864494	4.04352	0.0374121	1.19745e-06
TG(12:0/18:2/18:3)	TG	10.493	9.9119	8.07691	24.1108	3.64942	8.42997	8.82313	18.5461	0.150609	0.0915644	0.270571	0.471016	0.0270227	1.70311	1.15953	0.672924	11.5052	0.568294	1.07976	6.57003	0.590536	0.000348056
TG(18:1/18:2/22:3)	TG	13.0668	8.53292	12.8037	14.1828	9.74391	9.70299	10.7918	11.3208	0.0680239	0.0444815	0.135829	0.0665395	0.0547257	0.298454	0.125373	0.121222	11.2682	0.114331	0.217229	1.94836	0.0822825	1.86486e-10
TG(10:0/18:2/18:2)	TG	9.58232	10.405	7.82661	19.4714	4.35275	8.2926	8.91747	14.7292	0.0585067	0.0739997	0.110924	0.151349	0.0425182	0.404762	0.278649	0.202632	10.4472	0.165418	0.314294	4.65238	0.1251	2.13202e-05
TG(18:0/18:1/22:5)	TG	11.3266	8.05906	10.7496	11.9124	11.1269	6.78159	12.0722	9.72348	0.0906108	0.066475	0.135889	0.0138861	0.0419324	0.142199	0.110655	0.135883	10.219	0.0921913	0.175163	1.90343	0.0477816	4.89898e-10
TG(18:1/18:1/22:6)	TG	10.5139	7.96127	12.6232	15.0122	8.45579	6.64773	8.5709	11.3116	0.0776288	0.0709683	0.0778119	0.0956013	0.0824287	0.130695	0.174921	0.119156	10.1371	0.103651	0.196937	2.76865	0.0358157	6.88091e-08
TG(18:3/18:2/20:5)	TG	8.03806	10.054	8.10218	17.368	5.21414	11.3566	8.13384	10.7543	0.0133833	0.0146215	0.0119735	0.0111347	0.0117709	0.0290129	0.0251177	0.0472941	9.87764	0.0205386	0.0390233	3.594	0.0127252	1.95635e-06
TG(16:0/14:2/22:6)	TG	7.86613	5.69307	8.08052	15.9737	4.07695	9.10804	6.87752	13.6519	0.0251087	0.0463089	0.0571318	0.0709238	0.0177386	0.18737	0.137107	0.129963	8.91598	0.0839564	0.159517	4.00065	0.0606988	2.15041e-05
TG(16:0/14:0/16:0)	TG	7.84217	7.76237	11.2887	11.2573	10.9451	8.79306	10.2239	0.0234775	0.387486	0.618742	0.591435	0.609741	0.207867	1.04943	1.13049	0.787484	8.517	0.672835	1.27839	3.72715	0.310661	3.65872e-05
TG(24:0/18:2/18:2)	TG	5.03499	5.20416	9.01673	11.9521	3.73635	7.88838	6.31723	8.23756	0.0182998	0.0204821	0.0511772	0.0154607	0.00871151	0.0497014	0.0127041	0.0315735	7.17343	0.0260138	0.0494262	2.64235	0.016489	2.29405e-06
TG(16:0/18:2/23:0)	TG	4.8318	4.94843	9.60276	11.2886	4.07853	6.6661	6.90351	7.89115	0.0139096	0.0145978	0.0229935	0.00670553	0.0116613	0.0674285	0.0216836	0.0263554	7.02636	0.0231669	0.0440171	2.49344	0.0190262	1.4864e-06
TG(16:0/18:2/24:0)	TG	4.70363	4.95511	8.97221	10.9076	4.17653	7.46929	6.33648	7.56054	0.0246263	0.02309	0.0592642	0.0177547	0.0157903	0.0943808	0.0295918	0.0396523	6.88517	0.0380188	0.0722357	2.31315	0.0267493	8.03816e-07
TG(18:4/18:2/18:3)	TG	6.81683	4.0241	5.75805	14.0506	1.79231	5.10348	3.6804	10.5965	0.0154293	0.0154815	0.0208611	0.0227499	0.0158243	0.0835453	0.0559261	0.0657164	6.47778	0.0369417	0.0701893	4.01128	0.027228	0.000461169
TG(18:3/18:2/22:5)	TG	4.67029	4.17453	6.33686	5.90992	3.14682	3.03776	4.0106	4.97876	0.00328716	0.014529	0.0152385	0.00608384	0.00766462	0.0188188	0.0224882	0.0225279	4.53319	0.0138298	0.0262765	1.1908	0.00743683	3.85681e-08
TG(16:0/16:0/16:0)	TG	3.90337	3.65303	4.9855	7.58181	3.53246	3.8602	3.95476	4.61471	0.0242535	0.0298622	0.0323881	0.0413055	0.0235268	0.113445	0.21507	0.255475	4.51073	0.0919159	0.17464	1.33425	0.0938031	2.14965e-07
TG(24:1/18:2/18:3)	TG	3.22502	3.44743	5.3453	4.05053	3.24797	3.8252	4.36969	4.91282	0.0223676	0.0127188	0.0148603	0.00796926	0.013192	0.0278257	0.0200549	0.0249913	4.05299	0.0179975	0.0341952	0.780279	0.00686816	7.10566e-10
TG(18:2/18:2/21:1)	TG	4.21076	3.33962	4.57996	5.73083	2.67582	3.88645	3.23563	4.25808	0.0114404	0.00440515	0.00502719	0.0129618	0.0042197	0.0436968	0.0170192	0.0181707	3.98965	0.0146176	0.0277735	0.943323	0.0129902	1.02194e-08
TG(18:3/14:2/18:2)	TG	3.82626	2.09437	3.39225	7.64912	1.39244	3.85757	2.43274	6.34394	0.0577611	0.0913279	0.104024	0.0714397	0.0329753	0.158848	0.297684	0.328317	3.87359	0.142797	0.271314	2.13773	0.111612	0.000221759
TG(22:0/18:2/18:3)	TG	3.74707	3.07051	3.30922	5.03852	3.23691	3.44898	3.88256	4.62585	0.0143986	0.0143141	0.0286061	0.00761227	0.0142994	0.0281805	0.0220565	0.0230179	3.79495	0.0190607	0.0362153	0.700884	0.00753016	4.13614e-10
TG(16:0/14:0/14:0)	TG	3.8346	2.51057	3.90488	5.48804	3.24323	3.17163	3.99327	3.48819	0.0928037	0.151267	0.122089	0.195736	0.0520423	0.507931	0.43171	0.271236	3.7043	0.228102	0.433394	0.869357	0.164366	2.49059e-08
TG(16:0/18:1/24:0)	TG	2.59044	2.40025	4.9506	6.23324	2.1906	3.239	3.4686	4.53391	0.023179	0.0135272	0.0344802	0.00612185	0.00339201	0.0529766	0.0124411	0.027799	3.70083	0.0217396	0.0413053	1.42134	0.0165241	3.78638e-06
TG(18:0/16:0/16:0)	TG	3.05517	2.80308	4.06493	5.06256	2.8236	2.55655	3.38196	3.0257	0.00538139	0.00634437	0.0103058	0.00483232	0.0041649	0.0541775	0.084262	0.116335	3.34669	0.0357254	0.0678782	0.831761	0.0440369	2.14805e-08
TG(16:0/18:2/23:0)	TG	2.48207	2.50555	4.35734	5.65271	1.79231	2.8304	2.88617	3.9349	0.0378057	0.0293892	0.048904	0.0277723	0.0218449	0.175906	0.0347723	0.018621	3.30518	0.049377	0.0938162	1.25477	0.051999	3.71722e-06
TG(18:2/18:2/22:6)	TG	3.31463	3.05296	4.03124	4.7825	2.12975	1.99309	2.4674	2.52885	0.00544498	0.00498993	0.00701272	0.00365546	0.00443135	0.00772132	0.00701922	0.00917804	3.03755	0.00618163	0.0117451	0.971606	0.00185739	4.29385e-07
TG(18:1/18:1/24:0)	TG	2.009	1.9899	4.1263	4.46519	1.69906	2.88377	2.92564	4.01848	0.00384197	0.00825993	0.0293303	0.00570513	0.00645143	0.030364	0.0108222	0.0111395	3.01467	0.0132393	0.0251547	1.08	0.0105449	1.68062e-06
TG(20:1/18:2/22:6)	TG	3.01453	2.79472	4.06252	3.47961	2.05389	2.05696	2.82167	2.51306	0.0153065	0.00962942	0.0135286	0.00416991	0.0171188	0.0102541	0.0113716	0.00946676	2.84962	0.0113557	0.0215759	0.683873	0.00401676	1.24032e-08
TG(18:0/18:0/18:0)	TG	1.74953	2.28826	3.4801	4.04812	2.90579	2.2932	2.71192	2.91797	0.028113	0.0247239	0.0368138	0.000195736	0.0121923	0.025806	0.0304356	0.0195083	2.79936	0.0222236	0.0422248	0.724609	0.0115097	3.41387e-08
TG(16:0/14:3/18:2)	TG	2.33723	1.99993	2.07218	6.12987	1.34186	2.1777	2.02552	4.0417	0.0527832	0.0964662	0.0924569	0.175918	0.0290636	0.572753	0.380494	0.254283	2.76575	0.206777	0.392877	1.56377	0.188171	0.000416163
TG(26:1/18:1/18:2)	TG	1.9694	1.66898	3.49935	4.01447	1.46514	2.4953	2.64068	4.31659	0.00574541	0.0032786	0.0164194	0.00397038	0.00151214	0.0164716	0.00368131	0.00949457	2.75874	0.00757167	0.0143862	1.07701	0.0059495	4.39107e-06
TG(16:0/14:0/22:6)	TG	2.79154	1.55281	3.34893	3.36783	3.57435	2.19433	3.13262	1.37819	0.0311392	0.0897585	0.0858385	0.0962121	0.026059	0.314693	0.210361	0.113474	2.66757	0.120942	0.22979	0.856709	0.0967136	8.23576e-07
TG(18:2/18:2/23:0)	TG	1.84227	1.94477	3.79899	4.29091	1.33949	2.44281	2.41445	3.14643	0.00747122	0.00542636	0.0172944	0.00527891	0.00335044	0.0219166	0.0032653	0.0105965	2.65252	0.00932497	0.0177174	1.01593	0.0068775	3.57189e-06
TG(20:3/18:2/22:6)	TG	2.39558	2.01414	2.87602	3.17311	2.62366	1.567	2.26042	2.04407	0.0129074	0.00520707	0.00591435	0.00363239	0.0091537	0.00747568	0.00683868	0.0121685	2.36925	0.00791223	0.0150332	0.514881	0.00328588	3.42257e-09
TG(16:0/10:1/18:2)	TG	2.17259	3.58282	1.95786	3.78249	1.17591	1.78836	2.15067	2.22238	0.0183721	0.0148709	0.0231947	0.0178362	0.0100721	0.116639	0.0553963	0.0453869	2.35413	0.037721	0.0716698	0.886966	0.03559	3.45263e-06
TG(18:0/18:0/22:6)	TG	1.39108	2.00996	2.34534	2.1743	4.04613	2.15758	3.00266	1.49706	0.00405687	0.00203467	0.00437943	0.00148499	0.00438788	0.0056784	0.00312598	0.00375068	2.32801	0.00361236	0.00686349	0.856031	0.00135891	2.19504e-06
TG(18:0/18:2/24:0)	TG	1.7412	1.52606	2.98552	3.79331	1.59633	1.88635	2.3538	2.61986	0.0115763	0.007888	0.0203783	0.0126984	0.0118012	0.0267203	0.00585556	0.012293	2.3128	0.0136514	0.0259376	0.791139	0.00676675	9.97956e-07
TG(18:2/18:2/23:1)	TG	1.86937	1.69154	2.83149	3.18994	1.32606	2.13746	2.00626	2.52142	0.00650196	0.00506087	0.0115672	0.0058463	0.00323328	0.0204701	0.0062912	0.0117275	2.19669	0.0088373	0.0167909	0.615868	0.00557643	8.8086e-08
TG(26:0/18:1/18:2)	TG	1.55259	1.51102	2.89166	3.00364	1.3711	2.01759	2.04092	2.60779	0.00598005	0.00466529	0.0143252	0.00393644	0.00442757	0.0162532	0.0034164	0.0104746	2.12454	0.00793485	0.0150762	0.641921	0.00506668	2.20168e-07
TG(20:1/18:3/22:6)	TG	2.23824	1.8612	3.00477	2.93393	2.5399	1.46901	2.46643	0.172181	0.0130105	0.00810084	0.0132691	0.00583001	0.0100778	0.0198833	0.0148371	0.0125354	2.08571	0.012193	0.0231667	0.928206	0.00430586	1.89615e-05
TG(16:0/22:6/22:6)	TG	1.73599	1.63137	2.86037	2.39426	2.2072	1.16278	1.45849	1.25653	0.00543621	0.00528876	0.0054939	1.13112e-05	0.00606405	0.003948	0.00353414	0.00502739	1.83837	0.00435047	0.00826589	0.595474	0.00194268	5.01206e-07
TG(26:1/18:2/18:2)	TG	1.17747	0.966953	2.64738	2.90989	0.932507	1.51538	1.83201	2.28553	0.00498886	0.00472334	0.0132932	0.00451198	0.00141293	0.0145338	0.00332024	0.00795298	1.78339	0.00684216	0.0130001	0.765275	0.00473957	1.25769e-05
TG(18:0/18:1/24:1)	TG	1.23061	1.04886	2.52343	2.56734	1.06132	1.42001	1.87437	1.99392	0.00384197	0.00123361	0.00632473	0.00136554	0.00137702	0.0184913	0.00414049	0.00571078	1.71498	0.00531068	0.0100903	0.618284	0.00568336	1.78091e-06
TG(18:2/20:4/22:6)	TG	1.80685	0.881707	3.1925	2.02045	0.464831	2.45418	0.52958	1.92612	0.00660283	0.000185881	0.00123175	0.000248946	0.00491889	0.00181501	0.000740776	0.00467113	1.65953	0.0025519	0.00484862	0.964632	0.00247766	0.000253221
TG(16:0/18:1/23:0)	TG	1.16809	1.18842	2.54389	2.43032	0.836095	1.52851	1.69435	1.66701	0.0176309	0.0130886	0.0165139	0.0132821	0.0132789	0.0114578	0.0126766	0.0146743	1.63209	0.0140754	0.0267432	0.601202	0.00206995	2.43058e-06
TG(20:3/18:2/22:5)	TG	1.43381	1.27785	2.20334	2.50724	1.88003	0.849646	1.58364	1.1423	0.014335	0.0127661	0.0139852	0.00813486	0.0168788	0.0103742	0.0122429	0.0105038	1.60973	0.0124026	0.023565	0.556642	0.00273512	1.1572e-06
TG(18:3/18:3/22:6)	TG	1.39838	1.45085	2.08662	2.73561	0.800534	1.44626	0.887512	1.66887	0.00132057	0.00187063	0.00127661	0.000669874	0.00130389	0.00280304	0.00180867	0.00340104	1.55933	0.00180679	0.0034329	0.626923	0.000894524	5.98775e-06
TG(20:5/18:2/22:6)	TG	1.83602	1.49096	1.4705	2.44474	0.925395	1.22665	0.928426	1.73667	0.004388	0.00311306	0.00332933	0.00140626	0.00213914	0.00332025	0.00242346	0.00474133	1.50742	0.0031076	0.00590445	0.506183	0.00111505	7.66362e-07
TG(16:0/18:2/18:2)	TG	0.242893	0.107978	1.67988	2.92551	0.800534	1.28965	1.43538	2.77217	0.0926502	0.0109688	0.00683972	0.016886	0.04146	0.0186278	0.0971152	0.0519692	1.40675	0.0420646	0.0799227	1.0467	0.0360137	0.00244643
TG(18:2/22:6/22:6)	TG	1.43797	1.18007	2.01321	1.84738	1.25888	0.809574	0.94768	1.4237	0.00321041	0.00161931	0.00307586	0.00166959	0.00320115	0.00249189	0.00145114	0.00362354	1.36481	0.00254286	0.00483144	0.412267	0.000856982	2.14453e-07
TG(18:0/20:1/22:6)	TG	1.08682	0.789107	1.71959	1.82935	0.76355	1.0228	1.23418	1.14973	0.00116465	0.00033818	0.00200162	0.000100054	0.00140575	0.000901912	0.000281985	0.00055598	1.19939	0.000843767	0.00160316	0.391568	0.000651367	5.39728e-07
TG(18:4/18:1/20:5)	TG	1.05035	0.748407	1.09048	1.84016	0.595619	0.784464	0.624021	0.906317	0.00229378	0.000570584	0.000498294	0.000531691	0.00177594	0.00251782	0.00163795	0.00196805	0.954977	0.00147426	0.0028011	0.400677	0.000826337	9.61205e-06
TG(18:0/16:0/18:0)	TG	0.708775	0.793119	1.11419	1.488	0.870867	0.658736	1.05319	0.942629	0.000319287	0.00199038	0.00341986	0.00186506	0.000286856	0.00848826	0.00111362	0.00232961	0.953688	0.00247662	0.00470557	0.267499	0.0026449	8.70343e-08
TG(18:2/18:2/21:1)	TG	0.138692	0.0442024	0.162332	0.0669839	0.137426	0.0814824	0.265031	0.166237	0.0113	0.00998845	0.00122471	0.0123944	0.00738306	0.0446248	0.0180141	0.0192964	0.132798	0.0155282	0.0295037	0.070047	0.0130729	0.000371633

## Sheet: DAG
uM per ug protein level		D1D2 flox								ADGAT DKO								Average		Stdev
		F1	F2	F3	F4	F5	F6	F7	F8	K1	K2	K3	K4	K5	K6	K7	K8	D1D2 flox	ADGAT DKO	D1D2 flox	ADGAT DKO
LipidMolec	Class	[s1]	[s2]	[s3]	[s4]	[s5]	[s6]	[s7]	[s8]	[s9]	[s10]	[s11]	[s12]	[s13]	[s14]	[s15]	[s16]
DG(16:0/14:0)	DG	0.0574278	0.0578446	0.0782463	0.0996817	0.0515755	0.0817252	0.0738785	0.0794853	0.00697233	0.010974	0.00754492	0.0173747	0.00627407	0.103565	0.0358803	0.0306585	0.0724831	0.0274055	0.0159797	0.0327584
DG(16:0/16:0)	DG	0.454267	0.514477	0.697965	0.837925	0.408608	0.610187	0.613339	0.642341	0.053636	0.109516	0.0823114	0.140955	0.0424054	2.15899	0.575739	0.336812	0.597388	0.437545	0.138052	0.718917
DG(16:0/16:1)	DG	0.434406	0.333729	0.540691	0.938868	0.215002	0.576734	0.419224	0.860604	0.0468285	0.074544	0.0600356	0.150335	0.0417192	2.18798	0.600789	0.336995	0.539907	0.437403	0.249897	0.733572
DG(16:0/18:1)	DG	2.84604	2.8573	4.40709	5.22476	2.257	3.5379	3.53593	4.82825	0.517729	0.941432	0.80024	1.7046	0.376956		11.9959	5.75348	3.68678	3.15576	1.04685	4.32309
DG(16:0/18:2)	DG	11.0545	12.7621	15.6639	17.3754	8.98305	15.4219	14.2071	16.6207	1.73484	3.84876	3.47791	6.62122	1.54763		26.8705	17.2641	14.0111	8.76642	2.89017	9.64603
DG(16:0/18:3)	DG	0.457225	0.574363	0.686731	0.901949	0.366024	0.732563	0.579482	0.618997	0.0599419	0.102297	0.0844933	0.144943	0.0547703	1.38464	0.398803	0.263908	0.614667	0.311724	0.165234	0.449403
DG(16:0/20:4)	DG	0.0550191	0.0680525	0.0730689	0.118842	0.0463722	0.0569959	0.0664125	0.106447	0.0345929	0.0390861	0.0250172	0.0440922	0.04339	0.218056	0.0753471	0.0577904	0.0739013	0.0671714	0.0255513	0.0628447
DG(16:0/22:5)	DG	0.11232	0.127485	0.164356	0.182867	0.1044	0.121614	0.150579	0.174922	0.0118164	0.0162703	0.0114863	0.0123192	0.0144065	0.392832	0.0844524	0.0459257	0.142318	0.0736887	0.0298747	0.131483
DG(16:0/22:6)	DG	0.195567	0.245443	0.333059	0.345498	0.238022	0.218668	0.269253	0.2369	0.0142635	0.0353345	0.0143262	0.0286415	0.0188819	0.767986	0.211529	0.107476	0.260301	0.149805	0.0532125	0.258954
DG(16:1/14:0)	DG	0.0340299	0.0193541	0.0325049	0.0624354	0.0162511	0.0352604	0.0278282	0.0702256	0.00307485	0.00333597	0.00211216	0.0067874	0.0021857	0.0666153	0.0295862	0.0193596	0.0372362	0.0166321	0.0193041	0.0225217
DG(16:1/18:1)	DG	0.580617	0.400466	0.704803	1.3333	0.179786	0.789305	0.538245	1.12283	0.0241344	0.0247383	0.0270547	0.0702004	0.023856	2.41498	0.531605	0.288769	0.706168	0.425668	0.375748	0.824276
DG(16:1/18:2)	DG	1.67424	1.28846	2.05433	3.3073	0.686425	1.97877	1.29309	3.14323	0.25564	0.355964	0.376894	0.833099	0.0580522	3.13135	3.14311	1.64463	1.92823	1.22484	0.911499	1.27721
DG(16:1/18:3)	DG	0.209597	0.158335	0.207778	0.235675	0.0838362	0.290315	0.146281	0.253279	0.0667494	0.140523	0.135626	0.222935	0.0663211	1.06995	0.419081	0.3961	0.198137	0.31466	0.066018	0.334219
DG(18:0/16:0)	DG	0.0915295	0.138328	0.14902	0.139732	0.162178	0.132581	0.163514	0.102401	0.022712	0.00278128	0.0210758	0.0181502	0.0243802	0.0842239	0.0247075	0.0294318	0.13491	0.0284328	0.0260215	0.0238882
DG(18:0/18:0)	DG	0.126434	0.148354	0.180865	0.126366	0.146859	0.131523	0.154702	0.0832592	0.0779998	0.0800049	0.0878012	0.0829406	0.0996947	0.0763743	0.0883489	0.0694361	0.137295	0.0828251	0.0282987	0.00919618
DG(18:0/18:1)	DG	0.316297	0.519013	0.495755	0.425785	0.529908	0.506866	0.741824	0.370892	0.0532419	0.0570769	0.0480355	0.0587527	0.0502523	0.869111	0.200276	0.134309	0.488293	0.183882	0.127966	0.28218
DG(18:0/18:2)	DG	1.34294	2.05065	2.96916	2.55069	1.98351	2.5826	3.13268	2.97982	0.150625	0.2889	0.30982	0.536566	0.176544	3.05285	1.71927	1.57418	2.44901	0.976093	0.614895	1.0456
DG(18:0/18:2)	DG	0.998542	1.54071	1.78032	1.3847	1.83074	1.49519	2.00974	1.28351	0.290752	0.37186	0.266641	0.261008	0.284976	1.51263	0.491844	0.442463	1.54043	0.490272	0.326896	0.421911
DG(18:1/18:1)	DG	2.51009	2.48482	3.49471	4.42142	2.14544	3.10048	3.73082	4.57925	0.242562	0.206838	0.295357	0.487452	0.197003	17.5732	4.03972	1.62164	3.30838	3.08296	0.908556	6.00229
DG(18:1/18:2)	DG	10.7714	12.7893	15.9032	18.3988	10.1486	14.7614	16.4686	18.4882	0.882827	1.05626	1.41538	1.94611	0.75485		8.77128	5.15112	14.7162	2.85397	3.21623	3.01962
DG(18:1/22:5)	DG	0.0249614	0.0283643	0.0460832	0.0487426	0.0289056	0.0304035	0.0359539	0.0441585	0.000277424	0.000601813	5.18713e-05	6.70246e-05	0.000216183	0.0573514	0.0126997	0.0039756	0.0359466	0.00940513	0.00919932	0.0198534
DG(18:1/22:6)	DG	0.0870502	0.0900561	0.132071	0.109169	0.110602	0.0826991	0.103482	0.0807692	0.00476168	0.00548327	0.00277797	0.00371867	0.00584785	0.135352	0.0346358	0.0164062	0.0994873	0.026123	0.0176099	0.0454159
DG(18:2/14:1)	DG	0.0345496	0.0196808	0.0452871	0.0502381	0.00695999	0.0389867	0.0219422	0.0557136	0	0.00089954	0.000121514	0.00974165	0.000249386	0.0584475	0.0297174	0.0181877	0.0341698	0.0146706	0.0167719	0.0207158
DG(18:2/18:2)	DG	6.52032	9.53642	9.86137	11.9169	6.8809	10.2262	10.409	8.13917	0.832666	1.21709	1.46676	1.59086	0.74803	7.43588	2.86558	2.64565	9.18629	2.35032	1.85665	2.19506
DG(18:2/20:4)	DG	0.0589491	0.0632434	0.08611	0.0937933	0.05732	0.0663541	0.078089	0.0841929	0.0109099	0.0106823	0.00812205	0.00541736	0.0134304	0.0416876	0.0162662	0.0100942	0.0735065	0.0145763	0.0138152	0.0114232
DG(18:3/18:2)	DG	0.739504	0.935494	1.0892	1.48798	0.633975	1.15008	1.12728	1.24928	0.0555708	0.0883831	0.0972324	0.111745	0.0540031	0.541338	0.208626	0.219808	1.0516	0.172088	0.275587	0.162009
DG(18:3/18:3)	DG	0.0164635	0.0169315	0.0216667	0.0287549	0.0118719	0.0214984	0.0200844	0.0209977	0.000337402	0.00028531	0.000256893	0.000586788	0	0.00480168	0.0034763	0.00218895	0.0197836	0.00149167	0.00493221	0.00180227
DG(19:1/18:2)	DG	0.0383528	0.0407589	0.0626166	0.0634636	0.0430004	0.0476377	0.0528696	0.0501889	0.00116444	0.000199732	0.00292823	0.00221237	0.000848193	0.0251929	0.00657249	0.00570602	0.0498611	0.00560305	0.00944299	0.00823642
DG(20:0/18:2)	DG	0.0462718	0.0659655	0.0869403	0.0655665	0.0365066	0.0793116	0.0620284	0.0543908	5.52125e-05	0.00143029	0.00242324	0.000781769	0.000766358	0.02974	0.00671563	0.00635585	0.0621227	0.00603354	0.0164977	0.00991287
DG(20:1/18:1)	DG	0.146549	0.160286	0.190438	0.239928	0.125796	0.241068	0.221028	0.216824	0.00457895	0.00357385	0.0082593	0.00871504	0.00364723	0.176474	0.0355503	0.0246312	0.19274	0.0331787	0.0441042	0.0590378
DG(20:1/18:2)	DG	0.424687	0.58752	0.682335	0.609867	0.441243	0.682596	0.720554	0.549355	0.0171621	0.0225652	0.0282618	0.0253179	0.0270612	0.236124	0.0613512	0.0531175	0.58727	0.0588701	0.110579	0.0732804
DG(20:2/18:2)	DG	0.120349	0.136377	0.16675	0.192961	0.127919	0.138848	0.169591	0.183326	0.00706548	0.00748059	0.00751677	0.00807988	0.00757833	0.110424	0.0327631	0.0205132	0.154515	0.0251777	0.0270825	0.0356602
DG(20:3/18:2)	DG	0.054343	0.0809371	0.118786	0.0852412	0.0875826	0.0840542	0.113379	0.0973043	0.00389103	0.00515038	0.00390619	0.00350374	0.00498687	0.0712119	0.0266081	0.0155483	0.0902034	0.0168508	0.0201623	0.0234318
DG(20:5/18:2)	DG	0.0335397	0.0634249	0.0368373	0.0559863	0.0216792	0.0356966	0.0277674	0.0452868	0.0011021	0.000796308	0.000185069	0.000248046	0.000274832	0.0128705	0.00453275	0.00574983	0.0400273	0.00321993	0.0140803	0.00444542
DG(22:1/18:2)	DG	0.0320269	0.0361222	0.0558274	0.0389474	0.0249053	0.0547093	0.0361319	0.0380736	0.000283049	0.000506062	0.00208858	8.7372e-05	0.000886554	0.0257975	0.00635778	0.00701662	0.039593	0.00537794	0.0106354	0.00869549
Total DAG		42.7004	50.9402	63.2999	73.4996	39.2227	60.1427	61.5216	67.5546	5.49077	9.13162	9.18005	15.1596	4.75238	46.028	63.6592	38.6235	57.3602	24.0031	12.0109	22.373	0.00230551

## Sheet: MADAG
uM per ug protein level			D1D2 flox								ADGAT DKO
			F1	F2	F3	F4	F5	F6	F7	F8	K1	K2	K3	K4	K5	K6	K7	K8
LipidMolec		Class	[s1]	[s2]	[s3]	[s4]	[s5]	[s6]	[s7]	[s8]	[s9]	[s10]	[s11]	[s12]	[s13]	[s14]	[s15]	[s16]
TG(16:0e/16:0/16:0)		TG	1.1535	0.837413	1.24788	1.90146	0.581315	1.06392	1.2361	1.84811	0.00738789	0.011975	0.016699	0.0139812	0.00326729	0.0965369	0.0398155	0.0240112
TG(16:0e/16:0/18:0)		TG	0.612389	0.551339	0.684588	0.949289	0.460169	0.658649	0.784407	0.862297	0.00183831	0.000358819	3.53251e-05	4.19299e-05	0.00159377	0.0181092	0.00640109	0.00584587
TG(16:0e/16:0/18:2)		TG	3.40008	2.45541	3.32246	4.04692	1.54496	3.30199	2.98436	3.5532	0.0374329	0.0511892	0.074553	0.0720098	0.0190293	0.416771	0.195624	0.124956
TG(16:0e/16:0/20:0)		TG	0.28822	0.275126	0.300237	0.445197	0.225461	0.314275	0.408665	0.43751	0.000104952	0.000611433	0.00113419	0.000272836	0.000266448	0.0039671	0.000638931	0.00114891
TG(16:0e/18:0/22:5)		TG	0.676473	0.728683	0.890241	1.08523	0.753829	0.826548	0.977139	1.04757	0.0022543	0.00579184	0.00365523	0.00195601	0.00259456	0.0149705	0.00793562	0.00557304
TG(18:0e/16:0/18:2)		TG	2.37891	1.92555	2.54389	3.45196	1.55049	2.39906	2.37305	3.31174	0.0126531	0.0175776	0.0304569	0.0194922	0.0081087	0.0931389	0.0471742	0.0326065
TG(18:0e/18:0/18:2)		TG	0.995953	1.03548	1.00733	1.4267	0.704675	1.22315	1.27076	1.56207	0.00439677	0.00684959	0.0135889	0.00650463	0.00394191	0.0200061	0.00770799	0.00998327
TG(20:0e/12:0/22:5)		TG	1.76516	1.32298	1.83632	1.99762	1.1032	1.80323	1.59519	2.17873	0.00866416	0.011904	0.0123658	0.020293	0.0112891	0.138105	0.0554159	0.0336528
TG(20:0e/16:0/18:1)		TG	0.735659	0.70896	0.836933	1.28487	0.525602	0.965925	1.03105	1.30296	0.00289683	0.000561555	0.00750156	0.00129047	0.00118352	0.0106485	0.00416012	0.00165152
TG(20:0e/16:0/20:1)		TG	0.2158	0.194979	0.422859	0.354932	0.208234	0.262479	0.32106	0.324673	0.000267096	0.00010842	0.00250656	0.000160037	0.000469212	0.00149159	0.000222331	0.00016449
TG(20:0e/16:0/22:5)		TG	0.18058	0.200745	0.209263	0.260219	0.210209	0.237194	0.261854	0.293562	0	0.000152407	0.000670896	0.000258991	0.000412521	0.0021016	0.000952706	0.00125261
TG(20:0e/18:2/20:1)		TG	0.465674	0.431911	0.594697	0.53402	0.560927	0.697583	0.743299	0.816048	0.00356566	0.00303136	0.00877295	0.00414141	0.00204843	0.0168537	0.00385596	0.00687625
			12.8684	10.6686	13.8967	17.7384	8.42907	13.754	13.9869	17.5385	0.0814619	0.110111	0.17194	0.140402	0.0542047	0.8327	0.369904	0.247723	13.6101	0.251056	3.13427	0.255881
