# Supplementary material for: Mice lacking triglyceride synthesis enzymes in adipose tissue are resistant to diet-induced obesity
Source: eLife journal article supplement (doi:10.7554/elife.88049), 2023-05-11
Supplement: data1 [file Lipidomics.xlsx]

## Sheet: TG_total
	Triglycerides (TG)
uM per ug protein level		D1D2 flox								ADGAT DKO								Average		Stdev
		F1	F2	F3	F4	F5	F6	F7	F8	K1	K2	K3	K4	K5	K6	K7	K8	D1D2 flox	ADGAT DKO	D1D2 flox	ADGAT DKO	t test
LipidMolec	Class	[s1]	[s2]	[s3]	[s4]	[s5]	[s6]	[s7]	[s8]	[s9]	[s10]	[s11]	[s12]	[s13]	[s14]	[s15]	[s16]
TG(16:0/18:1/18:3)	TG	1046.18	776.738	1121.41	1361.79	613.084	886.306	879.906	1029.93	57.4102	67.3565	91.7931	76.8964	29.9139	125.932	128.964	91.0917	964.417	83.6697	228.483	33.4876	3.62369e-08
TG(18:1/18:2/18:2)	TG	995.015	772.225	1062.56	1152.18	695.903	855.858	922.169	929.628	29.5384	26.0568	41.6619	28.9532	16.533	51.1206	49.372	37.0433	923.192	35.0349	149.305	11.9665	1.15233e-10
TG(16:0/18:1/18:2)	TG	942.081	683.804	1004.56	1200.13	578.945	759.178	810.592	914.118	53.3753	50.6302	72.662	60.8248	26.2101	120.705	109.419	74.3117	861.676	71.0173	195.987	31.1576	2.08654e-08
TG(18:0/18:1/18:3)	TG	547.159	825.88	603.121	695.32	454.637	486.987	617.571	550.254	7.52385	9.14354	17.0691	11.9383	5.16266	28.0167	17.1683	15.4027	597.616	13.9282	119.254	7.2282	1.49935e-09
TG(18:1/18:1/18:2)	TG	567.479	502.197	649.45	717.796	410.856	501.248	595.044	565.949	27.9157	11.8868	22.9131	15.5693	10.5011	36.7916	25.7064	33.8382	563.752	23.1403	94.9771	9.8122	2.13508e-10
TG(18:0/18:1/18:2)	TG	509.022	444.698	599.27	630.656	436.54	474.3	877.981	473.544	7.87472	6.72705	14.8704	9.83296	3.96459	30.7597	19.9764	13.9988	555.751	13.5006	148.062	8.65082	6.15696e-08
TG(16:0/18:1/18:1)	TG	449.002	347.919	512.027	712.748	301.563	388.47	400.868	502.426	18.598	14.0496	23.9793	25.1254	6.81804	62.6112	61.3029	32.3814	451.878	30.6082	127.76	20.798	2.5797e-07
TG(18:3/18:2/18:2)	TG	432.643	367.559	499.633	659.262	219.455	409.031	399.52	514.592	3.57443	4.78354	8.2821	6.29967	2.02954	12.6	9.72918	8.76748	437.712	7.00824	127.444	3.49324	1.63625e-07
TG(16:1/18:1/18:3)	TG	412.219	212.028	447.888	615.512	151.967	332.911	309.315	488.031	11.3395	13.0112	17.8376	19.0442	5.89397	37.392	35.0667	21.1108	371.234	20.087	150.995	11.0781	1.26992e-05
TG(16:0/16:1/18:2)	TG	378.25	248.132	386.036	555.896	187.766	301.764	289.483	431.288	23.8369	22.6815	33.9572	35.2108	11.2588	76.4217	73.1553	36.0102	347.327	39.0665	115.713	23.5476	3.43784e-06
TG(18:1/18:1/18:1)	TG	269.36	266.936	418.887	438.707	226.331	219.783	355.428	397.112	7.83963	4.29551	10.0685	7.53625	2.85156	19.8696	15.6318	10.5872	324.068	9.83501	88.7506	5.65228	9.40926e-08
TG(14:0/18:2/18:2)	TG	331.88	212.195	352.222	507.578	159.316	263.442	260.602	411.971	13.1136	21.8215	21.3842	25.8176	4.13088	48.3503	54.0815	30.9246	312.401	27.453	112.459	16.8124	5.43963e-06
TG(18:0/16:0/18:2)	TG	298.432	259.498	382.546	359.74	281.254	255.305	312.011	266.815	8.07866	11.2655	17.4695	14.2662	4.21025	22.4762	29.7095	18.025	301.95	15.6876	47.1922	8.12877	1.03389e-10
TG(16:0/18:1/20:1)	TG	300.099	226.82	300.237	380.653	231.941	233.257	314.514	301.734	2.27623	1.50472	3.85841	3.43964	0.926331	22.4216	10.363	7.16099	286.157	6.49386	52.9521	7.16199	6.05962e-10
TG(16:0/18:2/18:3)	TG	279.363	215.287	298.672	418.274	148.569	238.944	228.93	298.391	8.78039	11.6675	17.5539	18.7863	4.80551	37.6104	32.5156	24.8721	265.804	19.574	79.2377	11.481	5.10145e-07
TG(18:0/16:0/18:1)	TG	187.874	188.794	270.033	262.743	181.76	154.863	244.429	237.747	2.69508	2.53904	5.00104	4.23236	0.982644	22.3124	11.6895	7.86954	216.03	7.1652	42.8068	7.00302	1.81262e-09
TG(16:0/16:0/18:2)	TG	222.261	184.03	260.045	262.623	163.742	188.023	201.108	204.5	35.7224	47.0614	53.4303	51.5131	17.0602	98.0927	95.4668	63.2265	210.791	57.6967	35.5076	27.7559	1.52953e-07
TG(16:0/16:0/18:1)	TG	232.889	147.091	216.243	268.272	162.003	154.513	180.602	188.34	16.4051	20.3295	26.6548	27.5958	6.52513	55.8015	54.5917	34.5137	193.744	30.3022	42.2881	17.4703	8.22143e-08
TG(18:0/18:1/18:1)	TG	149.112	159.543	207.819	206.012	198.355	137.714	215.259	162.615	0.5934	0.483943	1.36633	3.67582	0.39986	23.7862	11.0871	7.55963	179.554	6.11904	30.4536	8.12791	3.12209e-10
TG(16:1/18:2/18:3)	TG	172.557	119.01	167.266	292.792	59.5303	146.989	120.337	269.973	3.74548	5.44786	8.59994	7.95433	1.80107	17.1539	12.4234	9.41908	168.557	8.31814	78.2571	4.89852	4.76579e-05
TG(16:0/16:1/16:1)	TG	140.671	97.8653	151.743	225.724	90.1687	117.941	122.166	168.187	8.20365	12.4114	13.6151	15.6779	4.45591	32.2745	31.6915	19.7202	139.308	17.2563	43.6557	10.1771	2.12694e-06
TG(20:0/18:1/18:2)	TG	122.436	108.897	176.773	179.209	82.4242	121.266	117.931	149.428	0.364241	0.274328	0.858787	0.472509	0.205032	2.56149	1.05259	0.983494	132.295	0.846559	33.6631	0.766615	2.70153e-08
TG(18:2/14:1/18:2)	TG	137.545	77.4147	112.911	255.171	36.3441	100.442	77.3528	143.298	2.44728	4.47825	3.36353	6.46934	0.904788	17.5497	11.8681	8.55823	117.56	6.9549	65.6153	5.54398	0.000309964
TG(16:1/16:1/16:1)	TG	111.703	61.3601	116.124	199.041	42.7136	87.0907	74.4551	157.786	3.41874	3.27645	4.35328	6.84805	1.27385	21.3981	17.2174	10.1727	106.284	8.49481	51.8559	7.27419	0.000115876
TG(20:1/18:1/18:1)	TG	92.6764	71.5896	101.19	146.276	54.528	88.8931	93.5646	126.396	0.478272	0.263363	0.806685	0.473052	0.176044	3.82245	1.5987	0.935154	96.8892	1.06921	28.9222	1.20115	2.09877e-07
TG(20:1/18:2/18:2)	TG	99.3348	105.471	110.6	115.266	54.4489	89.418	82.0411	94.7273	1.30675	1.07087	2.15854	1.32292	0.668954	3.36119	2.29199	1.80647	93.9133	1.74846	19.3339	0.850924	2.09382e-09
TG(18:1/18:2/20:4)	TG	72.2946	53.9889	102.429	171.396	61.4348	58.2792	90.9654	136.333	0.510289	0.385908	0.586405	0.350751	0.250763	3.14421	0.755493	0.64286	93.3902	0.828334	41.8637	0.950193	2.11924e-05
TG(20:1/18:1/18:2)	TG	91.0404	75.9773	101.936	145.074	58.2659	86.9682	88.0773	96.9562	1.40872	1.13902	2.21687	1.24758	0.591665	2.62836	2.8591	1.71509	93.0369	1.7258	24.9796	0.783769	6.20874e-08
TG(18:3/18:2/20:3)	TG	79.0052	74.7237	107.544	154.208	61.3716	58.6204	83.1194	102.621	0.0815102	0.330225	0.481396	0.237137	0.0780635	0.895908	0.762361	0.70312	90.1517	0.446215	31.1574	0.315124	1.11367e-06
TG(18:0/18:0/18:1)	TG	60.322	62.7976	86.4008	114.881	85.6642	56.1619	91.8318	81.2704	0.178064	0.14744	0.32891	0.162209	0.105389	1.28402	0.500588	0.404999	79.9162	0.388952	19.5766	0.387685	1.63385e-08
TG(20:1/18:1/18:2)	TG	85.4031	64.795	85.5705	104.965	47.8819	69.8283	67.0616	77.2492	0.832645	0.66561	0.636496	0.290482	0.160681	1.46702	1.29847	0.608426	75.3443	0.744979	17.1184	0.450407	6.65608e-09
TG(18:3/18:2/18:3)	TG	74.8997	64.3939	81.3467	137.622	26.9321	72.978	56.4045	87.4649	0.280034	0.438365	0.668884	0.575264	0.154029	1.15356	1.01275	1.03938	75.2552	0.665284	31.3722	0.371965	9.71437e-06
TG(18:0/18:1/20:1)	TG	58.9152	50.4621	68.0136	152.045	42.2868	54.2108	63.7595	91.6812	0.105786	0.077891	0.235166	0.117673	0.0509841	1.16134	0.37598	0.267527	72.6718	0.299043	35.2727	0.365519	4.57863e-05
TG(16:0/18:1/22:5)	TG	75.1498	47.4534	70.7091	97.0924	55.3261	57.5443	74.7054	77.7042	0.267973	0.241219	0.382421	0.367175	0.275518	1.65125	0.930532	0.696366	69.4606	0.601557	15.6707	0.488358	5.99201e-09
TG(16:0/14:0/18:1)	TG	77.0879	56.9725	90.0951	118.367	49.3834	63.0301	68.4575	6.16749	3.95819	5.13827	5.92642	8.31947	1.91049	18.5186	18.695	10.9805	66.1951	9.18087	32.5091	6.42275	0.000249478
TG(16:0/18:2/24:1)	TG	76.0771	60.491	76.6296	151.444	26.0549	36.5634	35.0326	56.8178	0.0974965	0.0793959	0.264939	0.0990762	0.0492078	0.281668	0.0776882	0.150848	64.8888	0.13754	39.7152	0.0886639	0.000403598
TG(12:0/18:2/18:2)	TG	64.3024	44.0603	62.2976	119.497	27.2719	51.9534	51.023	96.7704	1.105	1.66252	2.54478	3.01613	0.424993	7.31601	3.7755	3.70565	64.647	2.94382	29.7933	2.13542	4.2721e-05
TG(16:0/18:2/22:6)	TG	60.4574	51.0471	84.8124	79.1235	64.4931	45.8552	58.5321	55.6662	0.572348	0.485663	0.588819	0.295097	0.372838	0.794649	2.39599	0.773578	62.4984	0.784873	13.379	0.673871	3.22731e-09
TG(18:2/18:2/22:6)	TG	53.3926	48.8909	77.857	71.2748	47.1311	40.6143	46.6812	48.5895	0.202449	0.194351	0.203985	0.139404	0.143315	0.244549	0.20781	0.247529	54.3039	0.197924	13.1067	0.040016	1.328e-08
TG(16:0/18:2/19:0)	TG	44.8377	42.673	63.3927	73.7869	47.2734	43.0729	57.8485	52.1464	0.210256	0.171132	0.410987	0.223291	0.0960345	5.11206	1.88069	0.534922	53.1289	1.07992	11.1408	1.72908	3.13932e-09
TG(18:1/18:2/22:6)	TG	50.5166	43.2747	60.998	54.4958	46.6175	31.7688	47.0759	37.0087	0.305471	0.210282	0.24965	0.152028	0.215237	0.336392	0.363225	0.314676	46.4695	0.26837	9.32044	0.072927	1.23997e-09
TG(18:3/18:2/20:4)	TG	48.2034	47.7543	51.8886	70.9623	26.0707	34.551	37.9688	51.97	0.127912	0.0993901	0.122914	0.173475	0.0800099	0.198423	0.173351	0.416654	46.1711	0.174016	13.5956	0.105974	1.60779e-07
TG(16:0/12:0/18:2)	TG	39.0441	27.0697	46.8947	71.4791	26.8689	33.7461	35.5236	52.2858	1.67099	2.56484	3.31525	4.98978	0.856034	11.9259	9.9313	6.21008	41.614	5.18302	14.9679	3.97321	1.08935e-05
TG(18:0/16:0/16:0)	TG	37.3352	33.6386	47.2918	56.3588	37.5374	34.6648	43.4947	39.1818	0.310077	0.360539	0.613965	0.452012	0.174268	2.14799	1.13736	0.853968	41.1879	0.756273	7.60143	0.64353	5.13166e-10
TG(16:0/18:1/22:6)	TG	38.9503	31.5409	46.5698	55.5295	36.5179	29.0827	35.7642	38.4017	0.407222	0.269168	0.275198	0.224242	0.234323	0.588856	0.575745	0.387385	39.0446	0.370267	8.46413	0.146738	3.59744e-09
TG(18:1/18:2/22:4)	TG	32.0626	26.8524	33.6337	49.4717	30.2907	22.8882	21.5356	31.7429	0.154271	0.106893	0.0890974	0.0868732	0.0876632	0.39248	0.415423	0.213095	31.0597	0.193224	8.64271	0.137184	8.25554e-08
TG(16:1/18:3/18:3)	TG	26.9464	18.378	28.5676	58.0896	10.1786	30.9463	19.485	51.4406	0.400205	0.735052	1.03541	1.05822	0.24037	2.02517	1.48371	1.26241	30.504	1.03007	16.4642	0.580421	0.00017399
TG(16:0/16:0/16:0)	TG	28.1447	23.6097	36.594	43.5101	24.9327	26.5279	26.6571	30.4149	1.58832	2.46379	2.90487	2.54376	0.770808	3.80607	4.7547	3.16	30.0489	2.74904	6.75428	1.23736	2.14401e-08
TG(18:3/18:2/18:2)	TG	28.1759	26.6769	28.5556	54.6641	17.7967	21.2521	21.5548	29.0126	0.213041	0.179409	0.219877	0.499385	0.126043	1.15192	0.433084	0.356129	28.4611	0.397361	11.3614	0.331519	6.41331e-06
TG(18:3/14:1/18:2)	TG	26.4983	19.1719	22.948	54.1352	1.81681	26.1517	22.2383	44.0203	0.462922	0.535326	0.669689	1.77411	0.195773	1.91054	2.87872	2.172	27.1226	1.32489	15.8629	0.98179	0.000419549
TG(18:0/18:2/20:0)	TG	20.3713	18.6872	41.4796	38.9668	16.0897	22.302	23.9231	29.1611	0.0524762	0.0376233	0.153934	0.0400567	0.0310667	0.281259	0.081868	0.104296	26.3726	0.0978225	9.39605	0.0849936	1.56416e-06
TG(16:0/14:0/16:1)	TG	26.2795	15.8874	28.2066	47.7409	13.308	20.9196	21.7377	33.5818	0.841636	1.03281	1.25609	2.07817	0.420269	8.10206	6.30689	3.46594	25.9577	2.93798	10.9702	2.83416	5.05548e-05
TG(18:1/18:2/22:1)	TG	25.4667	21.8463	31.5399	32.6205	12.7232	28.1728	22.4886	29.0683	0.101488	0.0698074	0.257495	0.109596	0.0562941	0.514209	0.21507	0.222101	25.4908	0.193257	6.46667	0.150173	2.64e-08
TG(18:4/16:1/18:2)	TG	24.3309	16.4808	26.3775	35.6494	10.06	20.0709	14.9026	47.1036	0.177494	0.468034	0.290889	0.449297	0.125684	1.33028	1.28571	0.860061	24.372	0.623432	12.0902	0.478974	7.13614e-05
TG(18:1/18:2/22:5)	TG	19.5585	19.9074	25.6675	23.5339	26.8135	16.44	27.5813	19.2984	0.101817	0.100035	0.113559	0.0668517	0.0695031	0.190099	0.191954	0.144756	22.3501	0.122322	4.10047	0.0489991	3.81102e-10
TG(16:0/18:1/24:1)	TG	16.2241	14.1742	27.4726	30.8537	7.47744	15.6175	15.2684	35.6156	0.0575856	0.0319906	0.107001	0.0284646	0.0181732	0.162669	0.0404238	0.0585911	20.3379	0.0631124	9.73346	0.0486857	3.92514e-05
TG(18:1/18:2/21:0)	TG	15.8594	13.0209	29.8071	33.1614	10.2418	17.6911	17.5115	24.9541	0.0410731	0.0237994	0.0510565	0.0286817	0.0197285	0.186141	0.0404238	0.0644185	20.2809	0.0569153	8.15838	0.0542344	6.13727e-06
TG(18:0/18:1/20:4)	TG	19.1209	13.1629	22.6832	23.7142	15.5523	10.9716	20.852	21.9452	0.0984394	0.0597888	0.095575	0.0521104	0.0694087	0.510388	0.129376	0.122904	18.5003	0.142249	4.72566	0.151372	2.89265e-08
TG(18:0/16:0/18:0)	TG	12.1707	13.5975	18.1345	23.606	23.0914	11.6541	19.5909	15.3328	0.0623662	0.0636372	0.0837463	0.0438031	0.0523636	0.20088	0.103159	0.082854	17.1472	0.0866012	4.70302	0.0499636	6.79262e-08
TG(18:1/18:2/24:1)	TG	13.1606	11.2491	22.9961	28.7383	7.77616	15.1101	14.7293	20.8029	0.0413362	0.0309156	0.106619	0.0347629	0.0162023	0.176862	0.0492542	0.0618756	16.8203	0.0647284	6.86154	0.0528062	7.24645e-06
TG(22:5/18:2/18:2)	TG	13.8379	14.4918	20.7458	18.6661	20.9498	13.7014	14.7485	13.1597	0.0775411	0.07888	0.0773291	0.0377627	0.0559162	0.1141	0.0958986	0.11305	16.2876	0.0813098	3.28059	0.0263835	1.2969e-09
TG(22:0/18:2/18:2)	TG	13.6816	11.4413	21.7807	25.1806	7.82121	16.2825	13.8147	18.7133	0.0343189	0.0253689	0.0823985	0.0246367	0.0172719	0.106376	0.0346938	0.0659945	16.0895	0.0488824	5.64297	0.0322381	1.29233e-06
TG(16:0/18:3/22:6)	TG	15.8281	12.4943	21.3836	26.3464	10.8819	12.1003	13.3141	14.7942	0.0561603	0.0473624	0.0530682	0.0372197	0.039816	0.125332	0.0862636	0.0742322	15.8929	0.0649317	5.32286	0.0295558	7.61308e-07
TG(22:1/18:2/18:2)	TG	14.3902	12.603	24.1152	21.0098	7.92631	15.6613	12.5728	16.5773	0.111268	0.0981216	0.257898	0.119586	0.0539887	0.387158	0.20153	0.214949	15.607	0.180562	5.0882	0.107983	6.06364e-07
TG(18:3/18:2/22:6)	TG	15.7656	14.4416	19.6869	25.481	10.0284	12.0303	11.6294	15.0635	0.0346259	0.032528	0.0298936	0.016886	0.0238669	0.0479955	0.0347527	0.041427	15.5158	0.032747	5.00698	0.00966608	4.77733e-07
TG(14:0/18:2/22:6)	TG	14.9112	11.1655	18.2428	24.3152	9.46732	11.9603	11.4369	19.8091	0.057476	0.0680015	0.0440156	0.0442375	0.0373216	0.132237	0.0956042	0.0858471	15.1635	0.0705925	5.17494	0.0323925	9.56675e-07
TG(16:0/10:0/18:2)	TG	12.9522	10.2378	13.4174	27.921	7.91841	10.8579	11.716	17.4317	0.137539	0.184268	0.230338	0.364868	0.0914237	1.09651	0.814363	0.557569	14.0566	0.43461	6.24741	0.361097	2.4896e-05
TG(18:1/18:2/24:0)	TG	9.47083	9.46059	18.7483	13.4016	7.70741	13.2115	13.1697	21.778	0.0112584	0.000432346	0.0734264	0.013012	0.0117974	0.07417	0.0163579	0.0352156	13.3685	0.0294587	4.81424	0.0290153	1.73958e-06
TG(24:1/18:2/18:2)	TG	10.8369	9.31852	18.0984	21.082	6.59156	12.5903	11.7738	15.1842	0.0468404	0.0391068	0.131463	0.0455949	0.0169903	0.15025	0.0426216	0.0793179	13.1845	0.0690232	4.7326	0.047724	1.73626e-06
TG(18:2/18:2/21:0)	TG	14.5777	7.46067	13.4294	17.1516	7.91051	14.2701	12.2551	17.8867	0.0220387	0.0258418	0.0599079	0.0223834	0.0097962	0.118863	0.0405219	0.0461286	13.1177	0.0431852	3.82537	0.0344716	1.41909e-07
TG(18:0/18:1/22:6)	TG	11.1391	11.6419	15.5353	12.6804	17.1012	8.6662	14.2768	9.7792	0.0475421	0.0259278	0.0412797	0.0186777	0.0293659	0.0724368	0.0459575	0.0525519	12.6025	0.0417175	2.88293	0.0170958	6.64558e-09
TG(18:0/16:0/22:6)	TG	8.49759	10.7142	12.1057	14.7958	17.5675	9.5805	15.3935	9.45416	0.0458755	0.0343555	0.0398917	0.0235508	0.0389845	0.0637575	0.0453492	0.0346196	12.2636	0.040798	3.29589	0.0116796	5.15381e-08
TG(16:0/18:1/22:0)	TG	8.7383	8.44935	14.6448	18.6781	7.45136	9.19553	10.5704	15.1935	0.0396696	0.0232405	0.0578158	0.0262113	0.000952031	0.127651	0.0422487	0.0462081	11.6152	0.0454997	4.04352	0.0374121	1.19745e-06
TG(12:0/18:2/18:3)	TG	10.493	9.9119	8.07691	24.1108	3.64942	8.42997	8.82313	18.5461	0.150609	0.0915644	0.270571	0.471016	0.0270227	1.70311	1.15953	0.672924	11.5052	0.568294	6.57003	0.590536	0.000348056
TG(18:1/18:2/22:3)	TG	13.0668	8.53292	12.8037	14.1828	9.74391	9.70299	10.7918	11.3208	0.0680239	0.0444815	0.135829	0.0665395	0.0547257	0.298454	0.125373	0.121222	11.2682	0.114331	1.94836	0.0822825	1.86486e-10
TG(10:0/18:2/18:2)	TG	9.58232	10.405	7.82661	19.4714	4.35275	8.2926	8.91747	14.7292	0.0585067	0.0739997	0.110924	0.151349	0.0425182	0.404762	0.278649	0.202632	10.4472	0.165418	4.65238	0.1251	2.13202e-05
TG(18:0/18:1/22:5)	TG	11.3266	8.05906	10.7496	11.9124	11.1269	6.78159	12.0722	9.72348	0.0906108	0.066475	0.135889	0.0138861	0.0419324	0.142199	0.110655	0.135883	10.219	0.0921913	1.90343	0.0477816	4.89898e-10
TG(18:1/18:1/22:6)	TG	10.5139	7.96127	12.6232	15.0122	8.45579	6.64773	8.5709	11.3116	0.0776288	0.0709683	0.0778119	0.0956013	0.0824287	0.130695	0.174921	0.119156	10.1371	0.103651	2.76865	0.0358157	6.88091e-08
TG(18:3/18:2/20:5)	TG	8.03806	10.054	8.10218	17.368	5.21414	11.3566	8.13384	10.7543	0.0133833	0.0146215	0.0119735	0.0111347	0.0117709	0.0290129	0.0251177	0.0472941	9.87764	0.0205386	3.594	0.0127252	1.95635e-06
TG(16:0/14:2/22:6)	TG	7.86613	5.69307	8.08052	15.9737	4.07695	9.10804	6.87752	13.6519	0.0251087	0.0463089	0.0571318	0.0709238	0.0177386	0.18737	0.137107	0.129963	8.91598	0.0839564	4.00065	0.0606988	2.15041e-05
TG(16:0/14:0/16:0)	TG	7.84217	7.76237	11.2887	11.2573	10.9451	8.79306	10.2239	0.0234775	0.387486	0.618742	0.591435	0.609741	0.207867	1.04943	1.13049	0.787484	8.517	0.672835	3.72715	0.310661	3.65872e-05
TG(24:0/18:2/18:2)	TG	5.03499	5.20416	9.01673	11.9521	3.73635	7.88838	6.31723	8.23756	0.0182998	0.0204821	0.0511772	0.0154607	0.00871151	0.0497014	0.0127041	0.0315735	7.17343	0.0260138	2.64235	0.016489	2.29405e-06
TG(16:0/18:2/23:0)	TG	4.8318	4.94843	9.60276	11.2886	4.07853	6.6661	6.90351	7.89115	0.0139096	0.0145978	0.0229935	0.00670553	0.0116613	0.0674285	0.0216836	0.0263554	7.02636	0.0231669	2.49344	0.0190262	1.4864e-06
TG(16:0/18:2/24:0)	TG	4.70363	4.95511	8.97221	10.9076	4.17653	7.46929	6.33648	7.56054	0.0246263	0.02309	0.0592642	0.0177547	0.0157903	0.0943808	0.0295918	0.0396523	6.88517	0.0380188	2.31315	0.0267493	8.03816e-07
TG(18:4/18:2/18:3)	TG	6.81683	4.0241	5.75805	14.0506	1.79231	5.10348	3.6804	10.5965	0.0154293	0.0154815	0.0208611	0.0227499	0.0158243	0.0835453	0.0559261	0.0657164	6.47778	0.0369417	4.01128	0.027228	0.000461169
TG(18:3/18:2/22:5)	TG	4.67029	4.17453	6.33686	5.90992	3.14682	3.03776	4.0106	4.97876	0.00328716	0.014529	0.0152385	0.00608384	0.00766462	0.0188188	0.0224882	0.0225279	4.53319	0.0138298	1.1908	0.00743683	3.85681e-08
TG(16:0/16:0/16:0)	TG	3.90337	3.65303	4.9855	7.58181	3.53246	3.8602	3.95476	4.61471	0.0242535	0.0298622	0.0323881	0.0413055	0.0235268	0.113445	0.21507	0.255475	4.51073	0.0919159	1.33425	0.0938031	2.14965e-07
TG(24:1/18:2/18:3)	TG	3.22502	3.44743	5.3453	4.05053	3.24797	3.8252	4.36969	4.91282	0.0223676	0.0127188	0.0148603	0.00796926	0.013192	0.0278257	0.0200549	0.0249913	4.05299	0.0179975	0.780279	0.00686816	7.10566e-10
TG(18:2/18:2/21:1)	TG	4.21076	3.33962	4.57996	5.73083	2.67582	3.88645	3.23563	4.25808	0.0114404	0.00440515	0.00502719	0.0129618	0.0042197	0.0436968	0.0170192	0.0181707	3.98965	0.0146176	0.943323	0.0129902	1.02194e-08
TG(18:3/14:2/18:2)	TG	3.82626	2.09437	3.39225	7.64912	1.39244	3.85757	2.43274	6.34394	0.0577611	0.0913279	0.104024	0.0714397	0.0329753	0.158848	0.297684	0.328317	3.87359	0.142797	2.13773	0.111612	0.000221759
TG(22:0/18:2/18:3)	TG	3.74707	3.07051	3.30922	5.03852	3.23691	3.44898	3.88256	4.62585	0.0143986	0.0143141	0.0286061	0.00761227	0.0142994	0.0281805	0.0220565	0.0230179	3.79495	0.0190607	0.700884	0.00753016	4.13614e-10
TG(16:0/14:0/14:0)	TG	3.8346	2.51057	3.90488	5.48804	3.24323	3.17163	3.99327	3.48819	0.0928037	0.151267	0.122089	0.195736	0.0520423	0.507931	0.43171	0.271236	3.7043	0.228102	0.869357	0.164366	2.49059e-08
TG(16:0/18:1/24:0)	TG	2.59044	2.40025	4.9506	6.23324	2.1906	3.239	3.4686	4.53391	0.023179	0.0135272	0.0344802	0.00612185	0.00339201	0.0529766	0.0124411	0.027799	3.70083	0.0217396	1.42134	0.0165241	3.78638e-06
TG(18:0/16:0/16:0)	TG	3.05517	2.80308	4.06493	5.06256	2.8236	2.55655	3.38196	3.0257	0.00538139	0.00634437	0.0103058	0.00483232	0.0041649	0.0541775	0.084262	0.116335	3.34669	0.0357254	0.831761	0.0440369	2.14805e-08
TG(16:0/18:2/23:0)	TG	2.48207	2.50555	4.35734	5.65271	1.79231	2.8304	2.88617	3.9349	0.0378057	0.0293892	0.048904	0.0277723	0.0218449	0.175906	0.0347723	0.018621	3.30518	0.049377	1.25477	0.051999	3.71722e-06
TG(18:2/18:2/22:6)	TG	3.31463	3.05296	4.03124	4.7825	2.12975	1.99309	2.4674	2.52885	0.00544498	0.00498993	0.00701272	0.00365546	0.00443135	0.00772132	0.00701922	0.00917804	3.03755	0.00618163	0.971606	0.00185739	4.29385e-07
TG(18:1/18:1/24:0)	TG	2.009	1.9899	4.1263	4.46519	1.69906	2.88377	2.92564	4.01848	0.00384197	0.00825993	0.0293303	0.00570513	0.00645143	0.030364	0.0108222	0.0111395	3.01467	0.0132393	1.08	0.0105449	1.68062e-06
TG(20:1/18:2/22:6)	TG	3.01453	2.79472	4.06252	3.47961	2.05389	2.05696	2.82167	2.51306	0.0153065	0.00962942	0.0135286	0.00416991	0.0171188	0.0102541	0.0113716	0.00946676	2.84962	0.0113557	0.683873	0.00401676	1.24032e-08
TG(18:0/18:0/18:0)	TG	1.74953	2.28826	3.4801	4.04812	2.90579	2.2932	2.71192	2.91797	0.028113	0.0247239	0.0368138	0.000195736	0.0121923	0.025806	0.0304356	0.0195083	2.79936	0.0222236	0.724609	0.0115097	3.41387e-08
TG(16:0/14:3/18:2)	TG	2.33723	1.99993	2.07218	6.12987	1.34186	2.1777	2.02552	4.0417	0.0527832	0.0964662	0.0924569	0.175918	0.0290636	0.572753	0.380494	0.254283	2.76575	0.206777	1.56377	0.188171	0.000416163
TG(26:1/18:1/18:2)	TG	1.9694	1.66898	3.49935	4.01447	1.46514	2.4953	2.64068	4.31659	0.00574541	0.0032786	0.0164194	0.00397038	0.00151214	0.0164716	0.00368131	0.00949457	2.75874	0.00757167	1.07701	0.0059495	4.39107e-06
TG(16:0/14:0/22:6)	TG	2.79154	1.55281	3.34893	3.36783	3.57435	2.19433	3.13262	1.37819	0.0311392	0.0897585	0.0858385	0.0962121	0.026059	0.314693	0.210361	0.113474	2.66757	0.120942	0.856709	0.0967136	8.23576e-07
TG(18:2/18:2/23:0)	TG	1.84227	1.94477	3.79899	4.29091	1.33949	2.44281	2.41445	3.14643	0.00747122	0.00542636	0.0172944	0.00527891	0.00335044	0.0219166	0.0032653	0.0105965	2.65252	0.00932497	1.01593	0.0068775	3.57189e-06
TG(20:3/18:2/22:6)	TG	2.39558	2.01414	2.87602	3.17311	2.62366	1.567	2.26042	2.04407	0.0129074	0.00520707	0.00591435	0.00363239	0.0091537	0.00747568	0.00683868	0.0121685	2.36925	0.00791223	0.514881	0.00328588	3.42257e-09
TG(16:0/10:1/18:2)	TG	2.17259	3.58282	1.95786	3.78249	1.17591	1.78836	2.15067	2.22238	0.0183721	0.0148709	0.0231947	0.0178362	0.0100721	0.116639	0.0553963	0.0453869	2.35413	0.037721	0.886966	0.03559	3.45263e-06
TG(18:0/18:0/22:6)	TG	1.39108	2.00996	2.34534	2.1743	4.04613	2.15758	3.00266	1.49706	0.00405687	0.00203467	0.00437943	0.00148499	0.00438788	0.0056784	0.00312598	0.00375068	2.32801	0.00361236	0.856031	0.00135891	2.19504e-06
TG(18:0/18:2/24:0)	TG	1.7412	1.52606	2.98552	3.79331	1.59633	1.88635	2.3538	2.61986	0.0115763	0.007888	0.0203783	0.0126984	0.0118012	0.0267203	0.00585556	0.012293	2.3128	0.0136514	0.791139	0.00676675	9.97956e-07
TG(18:2/18:2/23:1)	TG	1.86937	1.69154	2.83149	3.18994	1.32606	2.13746	2.00626	2.52142	0.00650196	0.00506087	0.0115672	0.0058463	0.00323328	0.0204701	0.0062912	0.0117275	2.19669	0.0088373	0.615868	0.00557643	8.8086e-08
TG(26:0/18:1/18:2)	TG	1.55259	1.51102	2.89166	3.00364	1.3711	2.01759	2.04092	2.60779	0.00598005	0.00466529	0.0143252	0.00393644	0.00442757	0.0162532	0.0034164	0.0104746	2.12454	0.00793485	0.641921	0.00506668	2.20168e-07
TG(20:1/18:3/22:6)	TG	2.23824	1.8612	3.00477	2.93393	2.5399	1.46901	2.46643	0.172181	0.0130105	0.00810084	0.0132691	0.00583001	0.0100778	0.0198833	0.0148371	0.0125354	2.08571	0.012193	0.928206	0.00430586	1.89615e-05
TG(16:0/22:6/22:6)	TG	1.73599	1.63137	2.86037	2.39426	2.2072	1.16278	1.45849	1.25653	0.00543621	0.00528876	0.0054939	1.13112e-05	0.00606405	0.003948	0.00353414	0.00502739	1.83837	0.00435047	0.595474	0.00194268	5.01206e-07
TG(26:1/18:2/18:2)	TG	1.17747	0.966953	2.64738	2.90989	0.932507	1.51538	1.83201	2.28553	0.00498886	0.00472334	0.0132932	0.00451198	0.00141293	0.0145338	0.00332024	0.00795298	1.78339	0.00684216	0.765275	0.00473957	1.25769e-05
TG(18:0/18:1/24:1)	TG	1.23061	1.04886	2.52343	2.56734	1.06132	1.42001	1.87437	1.99392	0.00384197	0.00123361	0.00632473	0.00136554	0.00137702	0.0184913	0.00414049	0.00571078	1.71498	0.00531068	0.618284	0.00568336	1.78091e-06
TG(18:2/20:4/22:6)	TG	1.80685	0.881707	3.1925	2.02045	0.464831	2.45418	0.52958	1.92612	0.00660283	0.000185881	0.00123175	0.000248946	0.00491889	0.00181501	0.000740776	0.00467113	1.65953	0.0025519	0.964632	0.00247766	0.000253221
TG(16:0/18:1/23:0)	TG	1.16809	1.18842	2.54389	2.43032	0.836095	1.52851	1.69435	1.66701	0.0176309	0.0130886	0.0165139	0.0132821	0.0132789	0.0114578	0.0126766	0.0146743	1.63209	0.0140754	0.601202	0.00206995	2.43058e-06
TG(20:3/18:2/22:5)	TG	1.43381	1.27785	2.20334	2.50724	1.88003	0.849646	1.58364	1.1423	0.014335	0.0127661	0.0139852	0.00813486	0.0168788	0.0103742	0.0122429	0.0105038	1.60973	0.0124026	0.556642	0.00273512	1.1572e-06
TG(18:3/18:3/22:6)	TG	1.39838	1.45085	2.08662	2.73561	0.800534	1.44626	0.887512	1.66887	0.00132057	0.00187063	0.00127661	0.000669874	0.00130389	0.00280304	0.00180867	0.00340104	1.55933	0.00180679	0.626923	0.000894524	5.98775e-06
TG(20:5/18:2/22:6)	TG	1.83602	1.49096	1.4705	2.44474	0.925395	1.22665	0.928426	1.73667	0.004388	0.00311306	0.00332933	0.00140626	0.00213914	0.00332025	0.00242346	0.00474133	1.50742	0.0031076	0.506183	0.00111505	7.66362e-07
TG(16:0/18:2/18:2)	TG	0.242893	0.107978	1.67988	2.92551	0.800534	1.28965	1.43538	2.77217	0.0926502	0.0109688	0.00683972	0.016886	0.04146	0.0186278	0.0971152	0.0519692	1.40675	0.0420646	1.0467	0.0360137	0.00244643
TG(18:2/22:6/22:6)	TG	1.43797	1.18007	2.01321	1.84738	1.25888	0.809574	0.94768	1.4237	0.00321041	0.00161931	0.00307586	0.00166959	0.00320115	0.00249189	0.00145114	0.00362354	1.36481	0.00254286	0.412267	0.000856982	2.14453e-07
TG(18:0/20:1/22:6)	TG	1.08682	0.789107	1.71959	1.82935	0.76355	1.0228	1.23418	1.14973	0.00116465	0.00033818	0.00200162	0.000100054	0.00140575	0.000901912	0.000281985	0.00055598	1.19939	0.000843767	0.391568	0.000651367	5.39728e-07
TG(18:4/18:1/20:5)	TG	1.05035	0.748407	1.09048	1.84016	0.595619	0.784464	0.624021	0.906317	0.00229378	0.000570584	0.000498294	0.000531691	0.00177594	0.00251782	0.00163795	0.00196805	0.954977	0.00147426	0.400677	0.000826337	9.61205e-06
TG(18:0/16:0/18:0)	TG	0.708775	0.793119	1.11419	1.488	0.870867	0.658736	1.05319	0.942629	0.000319287	0.00199038	0.00341986	0.00186506	0.000286856	0.00848826	0.00111362	0.00232961	0.953688	0.00247662	0.267499	0.0026449	8.70343e-08
TG(18:2/18:2/21:1)	TG	0.138692	0.0442024	0.162332	0.0669839	0.137426	0.0814824	0.265031	0.166237	0.0113	0.00998845	0.00122471	0.0123944	0.00738306	0.0446248	0.0180141	0.0192964	0.132798	0.0155282	0.070047	0.0130729	0.000371633
																		Average		Stdev
																		D1D2 flox	ADGAT DKO	D1D2 flox	ADGAT DKO	t test
Total TG (umol/ug protein)		11298	9244.21	12831.3	15986.7	7609.36	9598.02	10900.3	12162	375.833	397.628	566.668	519.242	179.586	1122.38	996.188	668.911	264561	58869.3	59876	28356.6	1.40988e-08
ug protein in mg tissue		21.9664	28.1114	28.3347	19.5566	24.0725	20.7087	27.766	20.3614	119.86	98.9954	71.8285	101.62	109.714	83.0083	94.2387	129.054
		248175	259868	363570	312644	183176	198763	302657	247636	45047.2	39363.4	40702.9	52765.5	19703	93167	93879.5	86325.6
tissue wight		1400	1460	1230	1370	1020	960	1230	1030	310	180	270	180	150	120	310	280
Total TG in the depot (m mol)		347445	379407	447191	428322	186840	190812	372268	255065	13964.6	7085.4	10989.8	9497.79	2955.45	11180	29102.6	24171.2	325919	13618.4	102318	8762.38	5.83052e-07
		Triolein molar mass: 885.42 g/mol
		1 mol	885.42 g
		1 u mol	885.42 ug
		1 u mol	0.885 mg
			265.5

## Sheet: PC
		Phosphatidylethanolamine (PE)
uM per ug protein level		D1D2 flox								ADGAT DKO								Average		Stdev
		F1	F2	F3	F4	F5	F6	F7	F8	K1	K2	K3	K4	K5	K6	K7	K8	D1D2 flox	ADGAT DKO	D1D2 flox	ADGAT DKO	t test
LipidMolec	Class	[s1]	[s2]	[s3]	[s4]	[s5]	[s6]	[s7]	[s8]	[s9]	[s10]	[s11]	[s12]	[s13]	[s14]	[s15]	[s16]
PC(14:0/18:2)	PC	0.0250317	0.0335289	0.0431472	0.0324003	0.0453995	0.0393857	0.0428854	0.0610175	0.0625069	0.0808882	0.0526709	0.0578017	0.0896313	0.0568366	0.0356451	0.0510432	0.0403495	0.060878	0.0107717	0.0171397
PC(16:0/18:2)	PC	5.07222	5.63924	5.9216	7.45478	5.45161	5.02214	5.4122	7.81632	16.946	18.202	15.0123	14.1073	21.2403	12.4023	7.01726	9.9637	5.97376	14.3614	1.06968	4.57247
PC(16:0/18:3)	PC	0.0924358	0.0712045	0.0786199	0.130527	0.0755742	0.0799569	0.0690387	0.093079	0.113486	0.112316	0.0861352	0.0954142	0.1481	0.107878	0.0578143	0.0795212	0.0863045	0.100083	0.0199274	0.0270489
PC(16:0/22:6)	PC	0.367464	0.460175	0.52906	0.457415	0.405129	0.586695	0.379296	0.825735	0.358134	0.527064	0.26572	0.311342	0.534936	0.642412	0.219885	0.293187	0.501371	0.394085	0.150705	0.153218
PC(16:0e/16:0)	PC	0.0378502	0.0471792	0.0762702	0.0488817	0.0823849	0.0436766	0.0945704	0.0966469	0.0235554	0.0274164	0.028554	0.0181037	0.0451866	0.066273	0.0405423	0.0366519	0.0659325	0.0357854	0.0241051	0.01524
PC(16:0e/18:2)	PC	0.0481585	0.0592322	0.0802117	0.0670331	0.0923108	0.0639789	0.0879299	0.0909482	0.0814127	0.0697034	0.0749975	0.0516932	0.129202	0.0902731	0.0429417	0.056275	0.0737254	0.0745623	0.016429	0.0271513
PC(17:0/18:1)	PC	0.0468588	0.0432907	0.061073	0.0620778	0.0577382	0.0475667	0.0561992	0.0648662	0.15742	0.10666	0.093181	0.098254	0.173123	0.0112555	0.0516845	0.0759271	0.0549588	0.0959382	0.00803459	0.0526382
PC(17:0/18:2)	PC	0.148018	0.17071	0.210146	0.224533	0.151744	0.160114	0.181879	0.207136	0.968985	0.601771	0.7166	0.508057	1.15571	0.278592	0.153262	0.318983	0.181785	0.587745	0.0290549	0.347986
PC(17:1/16:0)	PC	0.0456126	0.0464209	0.0658103	0.0598089	0.0503625	0.0428919	0.0758919	0.0882557	0.0446386	0.032945	0.0314695	0.00471229	0.0601858	0.0507138	0.0241085	0.034536	0.0593818	0.0354137	0.0162948	0.0170112
PC(18:0/20:4)	PC	0.0797241	0.0958752	0.114358	0.111559	0.123677	0.0763005	0.139402	0.166667	0.0523111	0.0530466	0.0463028	0.0352312	0.0800877	0.089114	0.0440263	0.0678257	0.113445	0.0584932	0.0303337	0.0187386
PC(18:0/20:4)	PC	0.862402	0.824991	1.26012	0.98671	1.2102	0.77536	1.20838	1.44483	3.12791	2.6821	1.91682	2.39904	5.41483	2.51319	1.35694	1.81738	1.07162	2.65353	0.242694	1.24546
PC(18:1/18:1)	PC	7.01992	7.66259	9.24149	10.1339	10.3642	8.07249	8.79299	10.3865	29.6395	33.6822	28.5413	23.5023	38.2035	15.4773	9.90798	16.3042	8.95926	24.4073	1.29431	9.83636
PC(18:1/20:4)	PC	0.311205	0.312538	0.412144	0.389711	0.408794	0.32507	0.479885	0.679055	0.185727	0.209096	0.158179	0.180445	0.322533	0.522411	0.245029	0.254201	0.4148	0.259703	0.121878	0.11822
PC(18:1/22:0)	PC	0.0357672	0.0425807	0.0353212	0.0634573	0.0225394	0.0486186	0.0264804	0.0432937	0.0157036	0.0300956	0.0204341	0.0198342	0.0146791	0.0234819	0.0122942	0.0215361	0.0397573	0.0197574	0.012923	0.00563536
PC(18:2/20:4)	PC	0.0715879	0.0842579	0.105281	0.0851845	0.0974112	0.0795729	0.138846	0.127073	0.055603	0.0599928	0.0375691	0.0483061	0.0940976	0.068523	0.0441414	0.0559562	0.0986519	0.0580236	0.0237663	0.0174483
PC(18:2/22:6)	PC	0.0397552	0.0425484	0.0607509	0.0473752	0.061342	0.0552636	0.0522411	0.077932	0.042	0.0544217	0.0383491	0.0354087	0.0602585	0.048232	0.0235333	0.0335215	0.054651	0.0419656	0.012256	0.0119294
PC(18:3/20:4)	PC	0.00811662	0.0101861	0.0141664	0.0104752	0.00933339	0.0165307	0.00849531	0.0262141	0.00501208	0.00613112	0.0026214	0.00321696	0.00636192	0.010845	0.00378965	0.00395795	0.0129397	0.00524201	0.00609784	0.00262456
PC(22:2/14:3)	PC	0.519684	0.636694	0.590076	0.862373	0.574175	0.521247	0.570334	0.866535	2.04172	2.22705	1.81196	1.76304	2.44118	1.57501	0.821693	1.28695	0.64264	1.74608	0.141915	0.521138
Total PC		14.8318	16.2832	18.8996	21.2282	19.2839	16.0569	17.8169	23.1621	53.9217	58.7648	48.9351	43.2395	70.2139	34.0347	20.1026	30.7554	18.4453	44.996	2.79628	16.3289	0.000468652
		D1D2 flox								ADGAT DKO

## Sheet: PE
	Phosphatidylethanolamine (PE)
uM per ug protein level		D1D2 flox								ADGAT DKO
		F1	F2	F3	F4	F5	F6	F7	F8	K1	K2	K3	K4	K5	K6	K7	K8
LipidMolec	Class	[s1]	[s2]	[s3]	[s4]	[s5]	[s6]	[s7]	[s8]	[s9]	[s10]	[s11]	[s12]	[s13]	[s14]	[s15]	[s16]
PE(16:0/18:1)	PE	0.0515767	0.0711238	0.0856122	0.102174	0.0675877	0.0682864	0.0637721	0.0845557	0.27731	0.131	0.115277	0.119567	0.278597	0.107332	0.0715366	0.0927385
PE(16:0/18:2)	PE	0.204384	0.258647	0.25695	0.372285	0.273344	0.276485	0.203796	0.275686	1.6882	1.34644	1.19331	0.968489	2.04111	0.557593	0.356122	0.71985
PE(16:0/20:4)	PE	0.0748993	0.0710754	0.117655	0.137025	0.0913488	0.0687372	0.102601	0.133218	0.497622	0.503248	0.33247	0.381893	0.721007	0.324683	0.23106	0.304491
PE(16:0/22:6)	PE	0.209013	0.19814	0.162148	0.417845	0.256393	0.201019	0.181061	0.288239	0.291528	0.278133	0.142834	0.1473	0.329662	0.164046	0.0574199	0.0939124
PE(16:0p/18:1)	PE	0.0896406	0.1022	0.141304	0.17311	0.047965	0.110076	0.101685	0.117113	0.0433578	0.0577388	0.0390652	0.0329387	0.0619898	0.0701594	0.0279869	0.0447244
PE(16:0p/18:2)	PE	0.0676711	0.0778361	0.08529	0.0982899	0.0613573	0.0664332	0.072866	0.0777338	0.172791	0.159905	0.0928358	0.0619283	0.190581	0.0627821	0.0311422	0.0565359
PE(16:0p/20:4)	PE	0.260999	0.285431	0.400774	0.370289	0.352904	0.264798	0.388619	0.401223	0.61828	0.565481	0.311499	0.27762	0.820517	0.401592	0.206902	0.29623
PE(16:0p/20:5)	PE	0.0222722	0.0059087	0.00326114	0.0361394	0.0257768	0.0288673	0.0189403	0.00749918	0.0153577	0.0226249	0.0156261	0.0149977	0.0222296	0.0161455	0.000298439	0.0145796
PE(16:0p/22:4)	PE	0.0217381	0.0229281	0.0429577	0.0315471	0.038543	0.0208031	0.0470235	0.0400231	0.00836414	0.0106363	0.0105291	0.00745299	0.0195964	0.0309819	0.0183402	0.015826
PE(16:0p/22:5)	PE	0.104311	0.125854	0.158415	0.158425	0.14446	0.127757	0.141921	0.162686	0.128344	0.118058	0.0708033	0.0586743	0.163667	0.144955	0.0688743	0.0875792
PE(16:0p/22:6)	PE	0.304084	0.349326	0.441325	0.6186	0.311826	0.304701	0.368174	0.480509	0.385288	0.373821	0.239634	0.224817	0.459868	0.366683	0.174199	0.243477
PE(18:0/18:1)	PE	0.0622767	0.0745929	0.099824	0.108219	0.083744	0.0754991	0.0897781	0.0881401	0.273211	0.163307	0.118641	0.111832	0.351484	0.114969	0.0646015	0.0953472
PE(18:0/18:2)	PE	0.39506	0.43807	0.561652	0.540912	0.52653	0.429921	0.469417	0.464817	3.329	2.84512	2.14187	1.63288	4.52885	0.825412	0.69203	1.3855
PE(18:0/20:4)	PE	0.372449	0.485669	0.60334	0.512596	0.601051	0.36681	0.597648	0.575818	1.9828	2.51907	1.9117	1.73642	2.89072	1.75773	1.0562	1.49709
PE(18:0/22:5)	PE	0.0302125	0.0357071	0.0338621	0.0361576	0.0441168	0.0298523	0.0416587	0.0495045	0.0423202	0.0530182	0.0336306	0.0332641	0.0298238	0.0416865	0.0272638	0.0320143
PE(18:0/22:6)	PE	0.21382	0.277848	0.357191	0.351593	0.369701	0.250439	0.279851	0.33515	0.453944	0.530608	0.37275	0.279542	0.578435	0.251728	0.113311	0.191738
PE(18:0p/18:1)	PE	0.0541048	0.0693974	0.0746785	0.118238	0.0549894	0.093347	0.0564936	0.0772878	0.0244007	0.0435345	0.0322112	0.0291819	0.0265941	0.0454365	0.0201808	0.0333766
PE(18:0p/18:2)	PE	0.0341827	0.0508419	0.0525459	0.0551621	0.046163	0.0503216	0.0438504	0.0531384	0.0317658	0.0497152	0.0342572	0.0180445	0.0475725	0.0215183	0.0133574	0.0192173
PE(18:0p/20:4)	PE	0.134844	0.182005	0.224737	0.187323	0.201877	0.14831	0.229475	0.197555	0.102983	0.132078	0.10515	0.0638511	0.179524	0.120696	0.0656862	0.0866951
PE(18:0p/22:5)	PE	0.00969045	0.0145636	0.0146496	0.0174707	0.0206459	0.0170966	0.0156462	0.0262471	0.00589204	0.00995722	0.00849332	0.00548436	0.0127544	0.0140864	0.0050682	0.00971298
PE(18:0p/22:6)	PE	0.094323	0.123466	0.151726	0.195854	0.158509	0.122181	0.127119	0.132574	0.0762379	0.109127	0.0881684	0.0542667	0.114203	0.0943367	0.031931	0.0698256
PE(18:1/18:1)	PE	0.0501881	0.0612491	0.0421997	0.100014	0.0543328	0.0632943	0.0512597	0.066964	0.133596	0.0637069	0.0663149	0.0564558	0.134992	0.0702275	0.0336401	0.0558547
PE(18:1/18:2)	PE	0.268121	0.253322	0.330473	0.438175	0.265556	0.261792	0.261533	0.371986	0.605087	0.48411	0.433745	0.270372	0.822263	0.205637	0.115908	0.241593
PE(18:1/20:4)	PE	0.0630066	0.0676548	0.131564	0.104516	0.068901	0.00999586	0.0823525	0.00469607	0.216981	0.188683	0.124229	0.127673	0.287326	0.216955	0.085719	0.106188
PE(18:1/22:6)	PE	0.100875	0.125048	0.173062	0.214187	0.116622	0.00570167	0.114001	0.0833664	0.0991272	0.07845	0.0582717	0.0397719	0.12075	0.0645821	0.000166311	0.0391157
PE(18:1/24:0)	PE	0.00420875	0.0113801	0.0127622	0.0188956	0.00849504	0.0120378	0.00983814	0.0119607	0.00549753	0.0099232	0.0085547	0.00656851	0.00597057	0.0103596	0.00571241	0.00817096
PE(18:1p/22:6)	PE	0.092507	0.113914	0.119057	0.15966	0.115583	0.117389	0.14058	0.19227	0.0788381	0.0578806	0.0366868	0.0364145	0.0928319	0.10575	0.0357437	0.0492316
PE(18:2/18:2)	PE	0.0504551	0.0849033	0.0735605	0.0902306	0.0534777	0.00869525	0.0554959	0.0630988	0.0923258	0.0926118	0.0680796	0.0409848	0.147809	0.0197592	0.0139869	0.0329418
PE(18:2/22:6)	PE	0.0097848	0.0169903	0.00169879	0.030331	0.0180499	0.0161116	0.0148169	0.000922366	0.0133852	0.0124437	0.00980402	0.0075299	0.0211239	0.0087164	0.00396056	0.00594779
PE(18:4/22:5)	PE	0.0113248	0.0139279	0.0135164	0.0207834	0.0148934	0.0122348	0.0126105	0.0200033	0.016946	0.0131993	0.00776828	0.00659957	0.0238154	0.00844094	0.00387675	0.00615213
PE(26:0/11:4)	PE	0.016721	0.0166354	0.0270783	0.0312386	0.017943	0.0176977	0.0252046	0.0474562	0.0131802	0.0101826	0.00742431	0.00918349	0.0243827	0.0287456	0.0111093	0.0138666
PE(26:1/11:2)	PE	0.0841572	0.106073	0.134046	0.133885	0.151454	0.0965026	0.172883	0.208292	0.0514017	0.0681582	0.0515584	0.0444014	0.10479	0.174001	0.0641742	0.0740285	Average		Stdev
																		D1D2 flox	ADGAT DKO	D1D2 flox	ADGAT DKO	t test
Total PE		3.5629	4.19173	5.12892	5.98117	4.66414	3.74319	4.58197	5.13973	11.7754	11.102	8.2832	6.9064	15.6548	6.44773	3.70751	6.02355	4.62422	8.73757	0.797748	3.85704	0.0104656

## Sheet: Raw data
uM per ug protein level		D1D2 flox								ADGAT DKO
		F1	F2	F3	F4	F5	F6	F7	F8	K1	K2	K3	K4	K5	K6	K7	K8
LipidMolec	Class	[s1]	[s2]	[s3]	[s4]	[s5]	[s6]	[s7]	[s8]	[s9]	[s10]	[s11]	[s12]	[s13]	[s14]	[s15]	[s16]
AcCa(16:0)	AcCa	0.0213653	0.0258781	0.0372085	0.0371388	0.0370686	0.037077	0.0359018	0.0318058	0.0136007	0.0118193	0.0124787	0.00907325	0.0177481	0.0208686	0.0100595	0.0100722
AcCa(18:0)	AcCa	0.00779649	0.00802565	0.0137688	0.0120852	0.0156933	0.012064	0.012805	0.0093297	0.0107165	0.00922356	0.00614081	0.00449416	0.0121603	0.0101443	0.0045089	0.00510366
AcCa(18:1)	AcCa	0.00636819	0.00766724	0.0162207	0.015735	0.00896223	0.0252417	0.0110427	0.0120687	0.00519879	0.00443973	0.00358595	0.00296792	0.0066662	0.00695855	0.00347153	0.00359593
CL(18:2/16:0/18:1/18:2)	CL	0.000786833	0.00304285	0.00443151	0.00223758	0.00456645	0.00429798	0.00217903	0.000740773	0.0142384	0.0168164	0.0179614	0.012094	0.0244186	0.0157522	0.00181111	0.0146612
CL(23:1/18:0/18:0/20:4)	CL	0.0207272	0.0297571	0.0358311	0.04456	0.0463722	0.0154304	0.0435805	0.0423299	0.260119	0.311043	0.235532	0.177883	0.433047	0.171877	0.0689853	0.137485
Cer(d18:1/22:0)	Cer	0.037664	0.0340852	0.0339556	0.067062	0.0366523	0.0357516	0.0496141	0.0544297	0.0320276	8.07529e-05	0.000135239	0.00011769	0.0499113	0.0309245	0.0139203	0.0244815
Cer(d18:1/24:0)	Cer	0.097192	0.103893	0.103596	0.148798	0.110477	0.0803702	0.127573	0.122866	0.107236	0.0983697	0.0895608	0.0556877	0.148967	0.0799455	0.0398405	0.0660409
Cer(d18:1/24:1)	Cer	0.124828	0.122631	0.144282	0.187353	0.103026	0.104676	0.155353	0.149711	0.0827292	0.0792568	0.0680591	0.0497053	0.110095	0.0851432	0.0352601	0.0553809
Cer(d18:2/16:0)	Cer	0.0145323	0.0338901	0.0217693	0.0296895	0.0174832	0.0395584	0.0339181	0.0240712	0.0239159	0.0297316	0.0558831	0.00572756	0.032875	0.0217667	0.0610729	0.0172897
Cer(d18:2/22:0)	Cer	0.0153268	0.0416753	0.0199181	0.0435506	0.0539899	0.0208632	0.0222981	0.0229663	0.0017395	0.0160795	0.0164271	0.0117247	0.0205527	0.0441627	0.020628	0.0142596
Cer(d18:2/24:0)	Cer	0.0521879	0.044715	0.0398607	0.0551451	0.0350872	0.0281253	0.0290001	0.040618	0.0636681	0.0483994	0.065455	0.0227699	0.0601834	0.0391065	0.0229381	0.0533
Cer(d22:0/18:0)	Cer	0.185848	0.1959	0.0335257	0.20899	0.158223	0.0300986	0.065718	0.0635727	0.221495	0.22453	0.188588	0.2123	0.233275	0.206493	0.196539	0.153256
CerG1(d13:0/25:2)	CerG1	0.771197	0.906912	0.846447	0.838859	0.898721	0.836307	0.882028	0.764117	0.967383	0.906273	0.916722	0.839008	0.963275	0.862393	0.790846	0.827611
CerG1(d18:1/22:0)	CerG1	0.0295971	0.0427415	0.0358507	0.0590239	0.0354909	0.0464098	0.0370738	0.041046	0.0130131	0.0245625	0.0177995	0.0151812	0.0162137	0.0309068	0.0136301	0.0190712
CerG1(d18:1/22:0+O)	CerG1	0.0763591	0.101852	0.105159	0.16394	0.0761353	0.127839	0.0854248	0.121932	0.0283658	0.0543465	0.0430032	0.0367509	0.0312979	0.102858	0.0362501	0.0550159
CerG1(d18:1/24:0)	CerG1	0.0794016	0.109746	0.104084	0.159874	0.0775089	0.136773	0.0756582	0.0860215	0.0434964	0.084194	0.0571852	0.0498899	0.0530227	0.07595	0.0356418	0.0554539
CerG1(d18:1/24:0+O)	CerG1	0.074204	0.10598	0.100079	0.157911	0.0782582	0.130845	0.0767868	0.096993	0.0395552	0.0706541	0.0558479	0.0432429	0.000138908	0.0825974	0.0322303	0.0523874
CerG1(d18:1/24:1)	CerG1	0.0438209	0.0631527	0.0579276	0.0801005	0.0432918	0.0707579	0.0371954	0.048088	0.0119561	0.0292902	0.0208013	0.018357	0.0207104	0.0437384	0.0137573	0.0218749
ChE(18:2)	ChE	0.343506	2.79627	3.71829	2.94816	1.87607	3.24234	2.72462	2.13821	0.684111	2.56039	1.53759	2.3042	1.0323	2.99666	1.47081	2.1304
DG(12:0/18:2)	DG	0.028921	0.0232558	0.0387959	0.0571079	0.0197685	0.0375767	0.0368307	0.0490218	0.00485125	0.00904403	0.00878364	0.0174301	0.00531506	0.0490068	0.0270454	0.0247298
DG(14:0/18:2)	DG	0.532866	0.5358	0.928014	0.902884	0.48953	0.754158	0.737483	0.869163	0.0967383	0.186229	0.174512	0.367657	0.10417	2.18763	0.862018	0.706043
DG(14:0/18:3)	DG	0.030345	0.0297344	0.0419951	0.0648655	0.0238355	0.0468332	0.0379897	0.0506947	0.0046936	0.0103531	0.00768921	0.0161524	0.00440293	0.0792737	0.0354867	0.0311221
DG(14:0/22:6)	DG	0.02748	0.0437124	0.0543621	0.0634636	0.0498688	0.0466215	0.0584691	0.0513561	0.000646355	0.0018866	0.000269492	0.00150519	0.000177524	0.0399904	0.010322	0.00749486
DG(15:0/18:1)	DG	0.0440322	0.0377873	0.0640818	0.0663143	0.0302335	0.0531849	0.0542586	0.0607325	0.00585804	0.00773493	0.00869215	0.0131944	0.00466293	0.184995	0.0544726	0.0401576
DG(15:0/18:2)	DG	0.0844303	0.102941	0.14521	0.125619	0.0842525	0.115516	0.133259	0.123371	0.0189679	0.00189857	0.0197315	0.0345906	0.0110691	0.241392	0.0787268	0.077212
DG(16:0/14:0)	DG	0.0574278	0.0578446	0.0782463	0.0996817	0.0515755	0.0817252	0.0738785	0.0794853	0.00697233	0.010974	0.00754492	0.0173747	0.00627407	0.103565	0.0358803	0.0306585
DG(16:0/16:0)	DG	0.454267	0.514477	0.697965	0.837925	0.408608	0.610187	0.613339	0.642341	0.053636	0.109516	0.0823114	0.140955	0.0424054	2.15899	0.575739	0.336812
DG(16:0/16:1)	DG	0.434406	0.333729	0.540691	0.938868	0.215002	0.576734	0.419224	0.860604	0.0468285	0.074544	0.0600356	0.150335	0.0417192	2.18798	0.600789	0.336995
DG(16:0/18:1)	DG	2.84604	2.8573	4.40709	5.22476	2.257	3.5379	3.53593	4.82825	0.517729	0.941432	0.80024	1.7046	0.376956	43.3495	11.9959	5.75348
DG(16:0/18:2)	DG	11.0545	12.7621	15.6639	17.3754	8.98305	15.4219	14.2071	16.6207	1.73484	3.84876	3.47791	6.62122	1.54763	65.2364	26.8705	17.2641
DG(16:0/18:3)	DG	0.457225	0.574363	0.686731	0.901949	0.366024	0.732563	0.579482	0.618997	0.0599419	0.102297	0.0844933	0.144943	0.0547703	1.38464	0.398803	0.263908
DG(16:0/20:4)	DG	0.0550191	0.0680525	0.0730689	0.118842	0.0463722	0.0569959	0.0664125	0.106447	0.0345929	0.0390861	0.0250172	0.0440922	0.04339	0.218056	0.0753471	0.0577904
DG(16:0/22:5)	DG	0.11232	0.127485	0.164356	0.182867	0.1044	0.121614	0.150579	0.174922	0.0118164	0.0162703	0.0114863	0.0123192	0.0144065	0.392832	0.0844524	0.0459257
DG(16:0/22:6)	DG	0.195567	0.245443	0.333059	0.345498	0.238022	0.218668	0.269253	0.2369	0.0142635	0.0353345	0.0143262	0.0286415	0.0188819	0.767986	0.211529	0.107476
DG(16:1/14:0)	DG	0.0340299	0.0193541	0.0325049	0.0624354	0.0162511	0.0352604	0.0278282	0.0702256	0.00307485	0.00333597	0.00211216	0.0067874	0.0021857	0.0666153	0.0295862	0.0193596
DG(16:1/18:1)	DG	0.580617	0.400466	0.704803	1.3333	0.179786	0.789305	0.538245	1.12283	0.0241344	0.0247383	0.0270547	0.0702004	0.023856	2.41498	0.531605	0.288769
DG(16:1/18:2)	DG	1.67424	1.28846	2.05433	3.3073	0.686425	1.97877	1.29309	3.14323	0.25564	0.355964	0.376894	0.833099	0.0580522	3.13135	3.14311	1.64463
DG(16:1/18:3)	DG	0.209597	0.158335	0.207778	0.235675	0.0838362	0.290315	0.146281	0.253279	0.0667494	0.140523	0.135626	0.222935	0.0663211	1.06995	0.419081	0.3961
DG(17:0/18:1)	DG	0.0339665	0.043785	0.0581719	0.061454	0.036082	0.0310556	0.052696	0.0475044	0.00719446	0.00731227	0.00805871	0.00815374	0.00511473	0.111096	0.0313356	0.0246239
DG(17:0/18:2)	DG	0.0794862	0.117821	0.14267	0.116926	0.110269	0.110774	0.145283	0.103374	0.0200284	0.0243979	0.0233914	0.0243283	0.020233	0.163144	0.0527231	0.0507446
DG(17:1/18:1)	DG	0.0757252	0.0651943	0.105208	0.111552	0.0452482	0.0873147	0.0779588	0.0963705	0.00362948	0.00823238	0.00974787	0.0136782	0.00600129	0.171135	0.0410731	0.0337543
DG(17:1/18:2)	DG	0.0951214	0.100899	0.138518	0.156462	0.0542812	0.117422	0.106347	0.139984	0.00714789	0.0106486	0.0132142	0.0166878	0.00639768	0.173186	0.0552678	0.0441368
DG(18:0/16:0)	DG	0.0915295	0.138328	0.14902	0.139732	0.162178	0.132581	0.163514	0.102401	0.022712	0.00278128	0.0210758	0.0181502	0.0243802	0.0842239	0.0247075	0.0294318
DG(18:0/18:0)	DG	0.126434	0.148354	0.180865	0.126366	0.146859	0.131523	0.154702	0.0832592	0.0779998	0.0800049	0.0878012	0.0829406	0.0996947	0.0763743	0.0883489	0.0694361
DG(18:0/18:1)	DG	0.316297	0.519013	0.495755	0.425785	0.529908	0.506866	0.741824	0.370892	0.0532419	0.0570769	0.0480355	0.0587527	0.0502523	0.869111	0.200276	0.134309
DG(18:0/18:2)	DG	1.34294	2.05065	2.96916	2.55069	1.98351	2.5826	3.13268	2.97982	0.150625	0.2889	0.30982	0.536566	0.176544	3.05285	1.71927	1.57418
DG(18:0/18:2)	DG	0.998542	1.54071	1.78032	1.3847	1.83074	1.49519	2.00974	1.28351	0.290752	0.37186	0.266641	0.261008	0.284976	1.51263	0.491844	0.442463
DG(18:0/20:4)	DG	0.286125	0.376738	0.453115	0.49023	0.506597	0.353409	0.539548	0.585538	0.140342	0.180282	0.14833	0.143577	0.202202	0.702926	0.244252	0.248612
DG(18:1/18:1)	DG	2.51009	2.48482	3.49471	4.42142	2.14544	3.10048	3.73082	4.57925	0.242562	0.206838	0.295357	0.487452	0.197003	17.5732	4.03972	1.62164
DG(18:1/18:2)	DG	10.7714	12.7893	15.9032	18.3988	10.1486	14.7614	16.4686	18.4882	0.882827	1.05626	1.41538	1.94611	0.75485	26.8123	8.77128	5.15112
DG(18:1/22:5)	DG	0.0249614	0.0283643	0.0460832	0.0487426	0.0289056	0.0304035	0.0359539	0.0441585	0.000277424	0.000601813	5.18713e-05	6.70246e-05	0.000216183	0.0573514	0.0126997	0.0039756
DG(18:1/22:6)	DG	0.0870502	0.0900561	0.132071	0.109169	0.110602	0.0826991	0.103482	0.0807692	0.00476168	0.00548327	0.00277797	0.00371867	0.00584785	0.135352	0.0346358	0.0164062
DG(18:2/14:1)	DG	0.0345496	0.0196808	0.0452871	0.0502381	0.00695999	0.0389867	0.0219422	0.0557136	0	0.00089954	0.000121514	0.00974165	0.000249386	0.0584475	0.0297174	0.0181877
DG(18:2/18:2)	DG	6.52032	9.53642	9.86137	11.9169	6.8809	10.2262	10.409	8.13917	0.832666	1.21709	1.46676	1.59086	0.74803	7.43588	2.86558	2.64565
DG(18:2/20:4)	DG	0.0589491	0.0632434	0.08611	0.0937933	0.05732	0.0663541	0.078089	0.0841929	0.0109099	0.0106823	0.00812205	0.00541736	0.0134304	0.0416876	0.0162662	0.0100942
DG(18:3/18:2)	DG	0.739504	0.935494	1.0892	1.48798	0.633975	1.15008	1.12728	1.24928	0.0555708	0.0883831	0.0972324	0.111745	0.0540031	0.541338	0.208626	0.219808
DG(18:3/18:3)	DG	0.0164635	0.0169315	0.0216667	0.0287549	0.0118719	0.0214984	0.0200844	0.0209977	0.000337402	0.00028531	0.000256893	0.000586788	0	0.00480168	0.0034763	0.00218895
DG(19:1/18:2)	DG	0.0383528	0.0407589	0.0626166	0.0634636	0.0430004	0.0476377	0.0528696	0.0501889	0.00116444	0.000199732	0.00292823	0.00221237	0.000848193	0.0251929	0.00657249	0.00570602
DG(20:0/18:2)	DG	0.0462718	0.0659655	0.0869403	0.0655665	0.0365066	0.0793116	0.0620284	0.0543908	5.52125e-05	0.00143029	0.00242324	0.000781769	0.000766358	0.02974	0.00671563	0.00635585
DG(20:1/18:1)	DG	0.146549	0.160286	0.190438	0.239928	0.125796	0.241068	0.221028	0.216824	0.00457895	0.00357385	0.0082593	0.00871504	0.00364723	0.176474	0.0355503	0.0246312
DG(20:1/18:2)	DG	0.424687	0.58752	0.682335	0.609867	0.441243	0.682596	0.720554	0.549355	0.0171621	0.0225652	0.0282618	0.0253179	0.0270612	0.236124	0.0613512	0.0531175
DG(20:2/18:2)	DG	0.120349	0.136377	0.16675	0.192961	0.127919	0.138848	0.169591	0.183326	0.00706548	0.00748059	0.00751677	0.00807988	0.00757833	0.110424	0.0327631	0.0205132
DG(20:3/18:2)	DG	0.054343	0.0809371	0.118786	0.0852412	0.0875826	0.0840542	0.113379	0.0973043	0.00389103	0.00515038	0.00390619	0.00350374	0.00498687	0.0712119	0.0266081	0.0155483
DG(20:5/18:2)	DG	0.0335397	0.0634249	0.0368373	0.0559863	0.0216792	0.0356966	0.0277674	0.0452868	0.0011021	0.000796308	0.000185069	0.000248046	0.000274832	0.0128705	0.00453275	0.00574983
DG(22:1/18:2)	DG	0.0320269	0.0361222	0.0558274	0.0389474	0.0249053	0.0547093	0.0361319	0.0380736	0.000283049	0.000506062	0.00208858	8.7372e-05	0.000886554	0.0257975	0.00635778	0.00701662
DG(22:5/18:2)	DG	0.0447083	0.0571641	0.0761949	0.0743524	0.0512009	0.0585203	0.0545625	0.0610438	0.000103188	0.00138615	0.000415956	0	0	0.0540277	0.0143855	0.00518033
LPC(16:0)	LPC	0.577659	0.625175	0.684289	0.714082	0.568205	0.595789	0.671071	0.781625	0.351698	0.420409	0.332061	0.308867	0.452228	0.569978	0.296219	0.340025
LPC(17:0)	LPC	0.0109827	0.0109927	0.012411	0.0129497	0.0117637	0.0111494	0.0137947	0.0150217	0.0143244	0.0112994	0.0104235	0.00788047	0.0184216	0.0087689	0.00439757	0.00765184
LPC(18:0)	LPC	0.0176678	0.0245125	0.0237425	0.0240582	0.0220205	0.0181913	0.0225586	0.0241841	0.0110461	0.0138578	0.0111555	0.0103251	0.01144	0.0155789	0.00840548	0.00968527
LPC(18:0)	LPC	0.359315	0.460035	0.489894	0.441067	0.424593	0.356415	0.500481	0.564139	0.538868	0.551319	0.442349	0.373344	0.688358	0.572453	0.273595	0.350101
LPC(18:2)	LPC	0.230725	0.255605	0.235276	0.278296	0.195812	0.191991	0.207572	0.222504	0.410959	0.349269	0.266747	0.170756	0.479933	0.212716	0.101311	0.146101
LPC(18:3)	LPC	0.0262123	0.0255197	0.0305268	0.031914	0.0252549	0.0250638	0.0279714	0.0317513	0.0155104	0.0184733	0.0148822	0.0126405	0.0208766	0.0279084	0.0130575	0.0163186
LPC(20:0)	LPC	0.011494	0.0169088	0.017603	0.0172258	0.0094451	0.012949	0.0126271	0.0206942	0.00345392	0.0092086	0.00699595	0.00615592	0.00562195	0.0105085	0.00500193	0.00726122
LPC(20:3)	LPC	0.0218217	0.0243855	0.0295011	0.03705	0.0242809	0.0210622	0.0264174	0.0408904	0.0276922	0.0297914	0.0242817	0.0195645	0.0329858	0.0425009	0.0145645	0.0200532
LPC(20:4)	LPC	0.0297069	0.0247393	0.0322509	0.0314	0.0290721	0.0229804	0.0340744	0.0314089	0.0286955	0.021099	0.0162863	0.014786	0.0446687	0.0186551	0.0118965	0.0139237
LPC(22:6)	LPC	0.0223246	0.0209103	0.0232736	0.0251331	0.0168671	0.0184369	0.0120541	0.023865	0.00987089	0.007417	0.00806575	0.00403994	0.0126078	0.0134786	0.00493434	0.00589951
LPE(18:0)	LPE	0.0291661	0.034362	0.0395383	0.0428683	0.0422511	0.0301706	0.0496141	0.0327317	0.167644	0.128965	0.0952617	0.0663968	0.209534	0.0715302	0.0197294	0.0549794
LPE(18:1)	LPE	0.00240022	0.0036027	0.000189755	0.00143798	0.000933687	0.00606376	0.000542152	0.000323116	0.0170797	0.00373094	0.00323334	0.00160268	0.0194062	0.00673932	0.000320315	0.00323816
LPE(20:4)	LPE	0.012766	0.0104075	0.0199523	0.0176371	0.00882486	0.0153584	0.0157827	0.0200872	0.0531702	0.0495963	0.0398713	0.0254177	0.0664489	0.030235	0.0135386	0.0197612
PC(14:0/18:2)	PC	0.0250317	0.0335289	0.0431472	0.0324003	0.0453995	0.0393857	0.0428854	0.0610175	0.0625069	0.0808882	0.0526709	0.0578017	0.0896313	0.0568366	0.0356451	0.0510432
PC(15:0/16:0)	PC	0.0436008	0.0519068	0.0796053	0.0532199	0.0787811	0.0520747	0.0993464	0.0984474	0.021506	0.022313	0.02092	0.0155745	0.0394546	0.0434729	0.022613	0.0276665
PC(15:0/18:2)	PC	0.0245688	0.02793	0.0314366	0.025775	0.0403908	0.0290176	0.0362776	0.0383548	0.0490833	0.0413089	0.0426968	0.0277768	0.0621934	0.0272865	0.0136845	0.0252607
PC(16:0/18:2)	PC	5.07222	5.63924	5.9216	7.45478	5.45161	5.02214	5.4122	7.81632	16.946	18.202	15.0123	14.1073	21.2403	12.4023	7.01726	9.9637
PC(16:0/18:3)	PC	0.0924358	0.0712045	0.0786199	0.130527	0.0755742	0.0799569	0.0690387	0.093079	0.113486	0.112316	0.0861352	0.0954142	0.1481	0.107878	0.0578143	0.0795212
PC(16:0/22:6)	PC	0.367464	0.460175	0.52906	0.457415	0.405129	0.586695	0.379296	0.825735	0.358134	0.527064	0.26572	0.311342	0.534936	0.642412	0.219885	0.293187
PC(16:0e/16:0)	PC	0.0378502	0.0471792	0.0762702	0.0488817	0.0823849	0.0436766	0.0945704	0.0966469	0.0235554	0.0274164	0.028554	0.0181037	0.0451866	0.066273	0.0405423	0.0366519
PC(16:0e/18:2)	PC	0.0481585	0.0592322	0.0802117	0.0670331	0.0923108	0.0639789	0.0879299	0.0909482	0.0814127	0.0697034	0.0749975	0.0516932	0.129202	0.0902731	0.0429417	0.056275
PC(17:0/18:1)	PC	0.0468588	0.0432907	0.061073	0.0620778	0.0577382	0.0475667	0.0561992	0.0648662	0.15742	0.10666	0.093181	0.098254	0.173123	0.0112555	0.0516845	0.0759271
PC(17:0/18:2)	PC	0.148018	0.17071	0.210146	0.224533	0.151744	0.160114	0.181879	0.207136	0.968985	0.601771	0.7166	0.508057	1.15571	0.278592	0.153262	0.318983
PC(17:1/16:0)	PC	0.0456126	0.0464209	0.0658103	0.0598089	0.0503625	0.0428919	0.0758919	0.0882557	0.0446386	0.032945	0.0314695	0.00471229	0.0601858	0.0507138	0.0241085	0.034536
PC(18:0/20:4)	PC	0.0797241	0.0958752	0.114358	0.111559	0.123677	0.0763005	0.139402	0.166667	0.0523111	0.0530466	0.0463028	0.0352312	0.0800877	0.089114	0.0440263	0.0678257
PC(18:0/20:4)	PC	0.862402	0.824991	1.26012	0.98671	1.2102	0.77536	1.20838	1.44483	3.12791	2.6821	1.91682	2.39904	5.41483	2.51319	1.35694	1.81738
PC(18:1/18:1)	PC	7.01992	7.66259	9.24149	10.1339	10.3642	8.07249	8.79299	10.3865	29.6395	33.6822	28.5413	23.5023	38.2035	15.4773	9.90798	16.3042
PC(18:1/20:4)	PC	0.311205	0.312538	0.412144	0.389711	0.408794	0.32507	0.479885	0.679055	0.185727	0.209096	0.158179	0.180445	0.322533	0.522411	0.245029	0.254201
PC(18:1/22:0)	PC	0.0357672	0.0425807	0.0353212	0.0634573	0.0225394	0.0486186	0.0264804	0.0432937	0.0157036	0.0300956	0.0204341	0.0198342	0.0146791	0.0234819	0.0122942	0.0215361
PC(18:2/20:4)	PC	0.0715879	0.0842579	0.105281	0.0851845	0.0974112	0.0795729	0.138846	0.127073	0.055603	0.0599928	0.0375691	0.0483061	0.0940976	0.068523	0.0441414	0.0559562
PC(18:2/22:6)	PC	0.0397552	0.0425484	0.0607509	0.0473752	0.061342	0.0552636	0.0522411	0.077932	0.042	0.0544217	0.0383491	0.0354087	0.0602585	0.048232	0.0235333	0.0335215
PC(18:3/20:4)	PC	0.00811662	0.0101861	0.0141664	0.0104752	0.00933339	0.0165307	0.00849531	0.0262141	0.00501208	0.00613112	0.0026214	0.00321696	0.00636192	0.010845	0.00378965	0.00395795
PC(22:2/14:3)	PC	0.519684	0.636694	0.590076	0.862373	0.574175	0.521247	0.570334	0.866535	2.04172	2.22705	1.81196	1.76304	2.44118	1.57501	0.821693	1.28695
PC(25:0/10:3)	PC	0.0188539	0.0198947	0.0238191	0.0255935	0.0180346	0.0186327	0.0202651	0.0262636	0.0187905	0.0144879	0.0126044	0.00945268	0.0233789	0.013496	0.00536894	0.00899415
PC(27:0/10:3)	PC	0.0123236	0.0106766	0.0134823	0.0206745	0.00981442	0.0135337	0.0113462	0.0207797	0.00659653	0.005058	0.00659441	0.00361187	0.0106231	0.0054532	0.00249795	0.00512895
PC(8:0p/10:1)	PC	0.0972071	0.0909055	0.0906337	0.108219	0.0718329	0.0184156	0.078656	0.0946317	0.148326	0.132375	0.0969277	0.0683918	0.0308712	0.0820367	0.0418735	0.0585504
PC(9:0/24:2)	PC	0.196551	0.262035	0.248234	0.319646	0.299304	0.236748	0.283122	0.341923	2.70137	2.16751	1.56517	1.16299	3.429	0.561684	0.392769	0.708691
PE(16:0/18:1)	PE	0.0515767	0.0711238	0.0856122	0.102174	0.0675877	0.0682864	0.0637721	0.0845557	0.27731	0.131	0.115277	0.119567	0.278597	0.107332	0.0715366	0.0927385
PE(16:0/18:2)	PE	0.204384	0.258647	0.25695	0.372285	0.273344	0.276485	0.203796	0.275686	1.6882	1.34644	1.19331	0.968489	2.04111	0.557593	0.356122	0.71985
PE(16:0/20:4)	PE	0.0748993	0.0710754	0.117655	0.137025	0.0913488	0.0687372	0.102601	0.133218	0.497622	0.503248	0.33247	0.381893	0.721007	0.324683	0.23106	0.304491
PE(16:0/22:6)	PE	0.209013	0.19814	0.162148	0.417845	0.256393	0.201019	0.181061	0.288239	0.291528	0.278133	0.142834	0.1473	0.329662	0.164046	0.0574199	0.0939124
PE(16:0p/18:1)	PE	0.0896406	0.1022	0.141304	0.17311	0.047965	0.110076	0.101685	0.117113	0.0433578	0.0577388	0.0390652	0.0329387	0.0619898	0.0701594	0.0279869	0.0447244
PE(16:0p/18:2)	PE	0.0676711	0.0778361	0.08529	0.0982899	0.0613573	0.0664332	0.072866	0.0777338	0.172791	0.159905	0.0928358	0.0619283	0.190581	0.0627821	0.0311422	0.0565359
PE(16:0p/20:4)	PE	0.260999	0.285431	0.400774	0.370289	0.352904	0.264798	0.388619	0.401223	0.61828	0.565481	0.311499	0.27762	0.820517	0.401592	0.206902	0.29623
PE(16:0p/20:5)	PE	0.0222722	0.0059087	0.00326114	0.0361394	0.0257768	0.0288673	0.0189403	0.00749918	0.0153577	0.0226249	0.0156261	0.0149977	0.0222296	0.0161455	0.000298439	0.0145796
PE(16:0p/22:4)	PE	0.0217381	0.0229281	0.0429577	0.0315471	0.038543	0.0208031	0.0470235	0.0400231	0.00836414	0.0106363	0.0105291	0.00745299	0.0195964	0.0309819	0.0183402	0.015826
PE(16:0p/22:5)	PE	0.104311	0.125854	0.158415	0.158425	0.14446	0.127757	0.141921	0.162686	0.128344	0.118058	0.0708033	0.0586743	0.163667	0.144955	0.0688743	0.0875792
PE(16:0p/22:6)	PE	0.304084	0.349326	0.441325	0.6186	0.311826	0.304701	0.368174	0.480509	0.385288	0.373821	0.239634	0.224817	0.459868	0.366683	0.174199	0.243477
PE(18:0/18:1)	PE	0.0622767	0.0745929	0.099824	0.108219	0.083744	0.0754991	0.0897781	0.0881401	0.273211	0.163307	0.118641	0.111832	0.351484	0.114969	0.0646015	0.0953472
PE(18:0/18:2)	PE	0.39506	0.43807	0.561652	0.540912	0.52653	0.429921	0.469417	0.464817	3.329	2.84512	2.14187	1.63288	4.52885	0.825412	0.69203	1.3855
PE(18:0/20:4)	PE	0.372449	0.485669	0.60334	0.512596	0.601051	0.36681	0.597648	0.575818	1.9828	2.51907	1.9117	1.73642	2.89072	1.75773	1.0562	1.49709
PE(18:0/22:5)	PE	0.0302125	0.0357071	0.0338621	0.0361576	0.0441168	0.0298523	0.0416587	0.0495045	0.0423202	0.0530182	0.0336306	0.0332641	0.0298238	0.0416865	0.0272638	0.0320143
PE(18:0/22:6)	PE	0.21382	0.277848	0.357191	0.351593	0.369701	0.250439	0.279851	0.33515	0.453944	0.530608	0.37275	0.279542	0.578435	0.251728	0.113311	0.191738
PE(18:0p/18:1)	PE	0.0541048	0.0693974	0.0746785	0.118238	0.0549894	0.093347	0.0564936	0.0772878	0.0244007	0.0435345	0.0322112	0.0291819	0.0265941	0.0454365	0.0201808	0.0333766
PE(18:0p/18:2)	PE	0.0341827	0.0508419	0.0525459	0.0551621	0.046163	0.0503216	0.0438504	0.0531384	0.0317658	0.0497152	0.0342572	0.0180445	0.0475725	0.0215183	0.0133574	0.0192173
PE(18:0p/20:4)	PE	0.134844	0.182005	0.224737	0.187323	0.201877	0.14831	0.229475	0.197555	0.102983	0.132078	0.10515	0.0638511	0.179524	0.120696	0.0656862	0.0866951
PE(18:0p/22:5)	PE	0.00969045	0.0145636	0.0146496	0.0174707	0.0206459	0.0170966	0.0156462	0.0262471	0.00589204	0.00995722	0.00849332	0.00548436	0.0127544	0.0140864	0.0050682	0.00971298
PE(18:0p/22:6)	PE	0.094323	0.123466	0.151726	0.195854	0.158509	0.122181	0.127119	0.132574	0.0762379	0.109127	0.0881684	0.0542667	0.114203	0.0943367	0.031931	0.0698256
PE(18:1/18:1)	PE	0.0501881	0.0612491	0.0421997	0.100014	0.0543328	0.0632943	0.0512597	0.066964	0.133596	0.0637069	0.0663149	0.0564558	0.134992	0.0702275	0.0336401	0.0558547
PE(18:1/18:2)	PE	0.268121	0.253322	0.330473	0.438175	0.265556	0.261792	0.261533	0.371986	0.605087	0.48411	0.433745	0.270372	0.822263	0.205637	0.115908	0.241593
PE(18:1/20:4)	PE	0.0630066	0.0676548	0.131564	0.104516	0.068901	0.00999586	0.0823525	0.00469607	0.216981	0.188683	0.124229	0.127673	0.287326	0.216955	0.085719	0.106188
PE(18:1/22:6)	PE	0.100875	0.125048	0.173062	0.214187	0.116622	0.00570167	0.114001	0.0833664	0.0991272	0.07845	0.0582717	0.0397719	0.12075	0.0645821	0.000166311	0.0391157
PE(18:1/24:0)	PE	0.00420875	0.0113801	0.0127622	0.0188956	0.00849504	0.0120378	0.00983814	0.0119607	0.00549753	0.0099232	0.0085547	0.00656851	0.00597057	0.0103596	0.00571241	0.00817096
PE(18:1p/22:6)	PE	0.092507	0.113914	0.119057	0.15966	0.115583	0.117389	0.14058	0.19227	0.0788381	0.0578806	0.0366868	0.0364145	0.0928319	0.10575	0.0357437	0.0492316
PE(18:2/18:2)	PE	0.0504551	0.0849033	0.0735605	0.0902306	0.0534777	0.00869525	0.0554959	0.0630988	0.0923258	0.0926118	0.0680796	0.0409848	0.147809	0.0197592	0.0139869	0.0329418
PE(18:2/22:6)	PE	0.0097848	0.0169903	0.00169879	0.030331	0.0180499	0.0161116	0.0148169	0.000922366	0.0133852	0.0124437	0.00980402	0.0075299	0.0211239	0.0087164	0.00396056	0.00594779
PE(18:4/22:5)	PE	0.0113248	0.0139279	0.0135164	0.0207834	0.0148934	0.0122348	0.0126105	0.0200033	0.016946	0.0131993	0.00776828	0.00659957	0.0238154	0.00844094	0.00387675	0.00615213
PE(26:0/11:4)	PE	0.016721	0.0166354	0.0270783	0.0312386	0.017943	0.0176977	0.0252046	0.0474562	0.0131802	0.0101826	0.00742431	0.00918349	0.0243827	0.0287456	0.0111093	0.0138666
PE(26:1/11:2)	PE	0.0841572	0.106073	0.134046	0.133885	0.151454	0.0965026	0.172883	0.208292	0.0514017	0.0681582	0.0515584	0.0444014	0.10479	0.174001	0.0641742	0.0740285
PI(16:0/20:4)	PI	0.0450607	0.0409833	0.0474107	0.101448	0.0328776	0.0427917	0.0385838	0.056888	0.160494	0.121772	0.0898947	0.0806236	0.156684	0.0656184	0.0487593	0.0580721
PI(17:0/20:4)	PI	0.00512029	0.00446944	0.00739774	0.0105169	0.000910586	0.00527425	0.00641482	0.00637926	0.0413852	0.0244252	0.0291806	0.0158851	0.0414186	0.0101141	0.00578636	0.0119159
PI(18:0/20:4)	PI	0.281295	0.255097	0.343927	0.427284	0.448803	0.348277	0.368337	0.350677	1.01318	0.974175	0.751893	0.591476	1.40652	0.530593	0.270501	0.393621
PI(18:0/20:5)	PI	0.0417314	0.0483248	0.0525459	0.0663252	0.0516146	0.055514	0.0563464	0.0598613	0.0427173	0.0477022	0.0310603	0.0278803	0.0484309	0.035891	0.0259162	0.0254926
PI(18:0/22:5)	PI	0.00356782	0.00348842	0.00526975	0.00431277	0.00234862	0.00110594	0.00518158	0.00603568	0.00337512	0.00349155	0.00358172	0.00219197	0.00469324	0.00472775	0.0036401	0.00154927
PI(18:1/20:4)	PI	0.0483365	0.0329964	0.0366097	0.08032	0.0226463	0.031739	0.0391072	0.0655765	0.0384008	0.0213065	0.0307662	0.0230586	0.0438918	0.0287592	0.0193591	0.0191738
PS(16:0/18:2)	PS	0.00128808	0.00152671	0.00351696	0.00393704	0.00248605	0.000546291	0.00480212	0.000152792	0.0130906	0.00848859	0.0122758	0.00915539	0.0201347	0.00912549	0.00632211	0.00598402
PS(18:0/18:1)	PS	0.084175	0.098005	0.128134	0.200573	0.0954413	0.127073	0.0990683	0.105269	0.0512992	0.0764795	0.05597	0.0457621	0.0499293	0.0847503	0.0407067	0.0540141
PS(18:0/18:2)	PS	0.0606743	0.0760773	0.0702634	0.110905	0.0760782	0.0788216	0.0835792	0.0643211	0.1628	0.143036	0.130047	0.0839515	0.180397	0.0819003	0.0433854	0.0926226
PS(18:0/20:3)	PS	0.0179103	0.0220568	0.0293711	0.0295142	0.0300526	0.0202188	0.0292282	0.0280641	0.0182269	0.0191801	0.015089	0.0108637	0.0227242	0.0301228	0.0150452	0.0156666
PS(18:0/20:5)	PS	0.00140114	0.000816278	0.000473349	0.00452152	2.58989e-06	0.0013689	0.000805206	0.00189131	0.00115868	0.000330159	0.00181068	0.000996739	0.00259103	0.00183546	0.000564668	0.000820719
PS(18:0/22:6)	PS	0.262958	0.241221	0.388647	0.564509	0.255783	0.274481	0.310601	0.406178	0.235938	0.216893	0.146542	0.113207	0.26114	0.113373	0.0660477	0.109289
SM(d12:0/22:1)	SM	1.44292	1.63588	1.56618	2.25123	1.68682	1.47743	1.8909	2.31244	1.45609	1.22675	0.892602	0.935498	1.66546	1.52649	0.827711	0.902414
SM(d13:0/21:2)	SM	0.0391489	0.0408878	0.0408097	0.065625	0.0244881	0.0434124	0.0292198	0.0475536	0.0483178	0.0406535	0.0325443	0.0260696	0.0355294	0.0517442	0.021172	0.0235883
SM(d13:0/28:2)	SM	0.0517614	0.0377003	0.0709064	0.1197	0.0290662	0.0453369	0.0567576	0.114208	0.0537669	0.0340243	0.0292899	0.0182014	0.0361214	0.0219867	0.00870549	0.0178177
SM(d14:1/26:1)	SM	0.0975444	0.0984457	0.110747	0.212319	0.0668789	0.113805	0.0829859	0.172635	0.0688037	0.0641467	0.0615088	0.0517367	0.0704889	0.0903217	0.0309666	0.0526782
SM(d15:0/19:0)	SM	0.11764	0.138124	0.12863	0.209463	0.110475	0.137528	0.139167	0.212614	0.0573882	0.051651	0.0363905	0.046722	0.0977594	0.0851534	0.0414219	0.0520057
SM(d15:0/20:1)	SM	0.0340576	0.0434158	0.0429181	0.0519982	0.0449956	0.0372318	0.0405137	0.0569048	0.0375575	0.0248994	0.025923	0.0185334	0.0430334	0.0231711	0.0113157	0.0240366
SM(d16:0/17:1)	SM	0.0319903	0.0359124	0.0442905	0.0476722	0.0415475	0.0334864	0.0448147	0.0613267	0.0187753	0.0197105	0.0152633	0.0134409	0.0243659	0.0255614	0.0129711	0.0162742
SM(d16:0/20:1)	SM	0.473644	0.609653	0.566836	0.758775	0.683127	0.514435	0.638235	0.820952	0.441447	0.504594	0.347041	0.340968	0.573532	0.549744	0.27997	0.314948
SM(d16:1/20:1)	SM	0.0320713	0.0355496	0.0464115	0.0710324	0.0389871	0.0324982	0.0384784	0.0620154	0.0437654	0.0456586	0.0274171	0.0418485	0.0409983	0.0345167	0.022566	0.0248628
SM(d16:1/26:1)	SM	0.0646054	0.0749609	0.0849214	0.0012714	0.0594024	0.0374538	0.0670108	0.124466	0.0519046	0.0568945	0.0521005	0.0403652	0.0604244	0.0516519	0.0257498	0.0401891
SM(d17:0/24:2)	SM	0.024523	0.026273	0.0391171	0.0525605	0.0255123	0.0241562	0.0367542	0.0551288	0.0672173	0.0453181	0.0453846	0.0295835	0.017428	0.0189872	0.00767448	0.0111729
SM(d18:1/21:0)	SM	0.0420031	0.042683	0.0534397	0.077132	0.032487	0.0441156	0.0397073	0.0705692	0.0253177	0.0199386	0.0203136	0.0130525	0.0251947	0.0225158	0.00831341	0.0150605
SM(d18:1/24:1)	SM	1.33839	1.43693	1.64811	2.4061	1.2751	1.35418	1.54374	2.2153	0.5794	0.645893	0.539053	0.473929	0.637916	1.16871	0.527484	0.629576
SM(d18:1/26:4)	SM	0.0746722	0.083754	0.0976471	0.128352	0.0809784	0.0166877	0.0827555	0.0737226	0.0337259	0.0322164	0.0342307	0.0277295	0.0412203	0.0104842	0.0296016	0.0376273
SM(d18:2/18:2)	SM	0.115403	0.14406	0.132123	0.195491	0.150179	0.120911	0.152915	0.231787	0.122847	0.101089	0.0641419	0.0652624	0.159442	0.145296	0.0602995	0.0700988
SM(d18:2/22:0)	SM	0.0319324	0.0252141	0.0346922	0.0546803	0.0277177	0.031647	0.0343195	0.0598407	0.0186684	0.0140721	0.0118195	0.0132291	0.0228044	0.039285	0.0175163	0.0182372
SM(d20:0/18:4)	SM	0.0167164	0.0445149	0.0418369	0.0500515	0.0547594	0.0318209	0.0294732	0.0673797	0.0311048	0.0347632	0.0227248	0.0157082	0.0505078	0.0406694	0.0164671	0.0194829
SM(d22:0/16:1)	SM	0.258769	0.276286	0.292234	0.47802	0.18524	0.311548	0.232637	0.485684	0.119294	0.144977	0.12716	0.103262	0.169876	0.21476	0.100306	0.109808
SM(d22:2/16:0)	SM	0.0401517	0.025412	0.0437499	0.0844429	0.0174725	0.0469283	0.022415	0.0848136	0.0220379	0.022911	0.0173728	0.019335	0.0302048	0.02466	0.013385	0.0154736
SM(d22:2/20:1)	SM	0.369388	0.439287	0.483661	0.612125	0.483412	0.435974	0.554135	0.698806	0.214826	0.257813	0.208017	0.198542	0.298792	0.373777	0.222211	0.244241
SM(d24:0/12:0)	SM	0.0389946	0.0460537	0.0473264	0.0697346	0.0225934	0.0491859	0.0450835	0.057376	0.0162818	0.0245521	0.0157692	0.0220331	0.0180126	0.0291607	0.010419	0.0166104
SM(d42:1)	SM	0.0428517	0.0596097	0.059761	0.091451	0.0351293	0.053442	0.0413585	0.0667997	0.0257867	0.033408	0.0242781	0.0200237	0.0225676	0.0321171	0.0131163	0.0219231
TG(10:0/18:2/18:2)	TG	9.58232	10.405	7.82661	19.4714	4.35275	8.2926	8.91747	14.7292	0.0585067	0.0739997	0.110924	0.151349	0.0425182	0.404762	0.278649	0.202632
TG(10:0/18:2/22:6)	TG	0.25623	0.351179	0.242235	0.604093	0.268926	0.225295	0.404526	0.34204	0.00215847	0.0054758	0.00534102	0.00806699	0.00111795	0.0213435	0.0143877	0.0179323
TG(11:0/10:1/18:2)	TG	0.215488	0.19782	0.499753	1.03703	0.26047	0.311913	0.353407	0.904274	0.000822777	0.000217785	0.00224906	0.000212704	0.000250385	0.00524307	0.00151491	0.00291102
TG(11:0/12:2/18:2)	TG	1.09411	1.38817	1.31527	1.95194	0.855062	0.384182	1.28424	1.38098	0.00505026	0.00244229	0.0113841	0.00183927	0.00241882	0.00676059	0.00434654	0.00810793
TG(11:0/16:0/18:2)	TG	2.51437	2.41864	2.35376	3.64307	2.05231	2.12783	3.01902	2.9932	0.0348014	0.056306	0.0176948	0.0829639	0.0290825	0.213162	0.0993522	0.117924
TG(11:0/18:1/18:2)	TG	3.64182	1.16085	2.59443	3.88586	0.803695	1.15578	3.14417	1.96327	0.0805015	0.0952407	0.152103	0.181212	0.0537053	0.534815	0.245879	0.138796
TG(11:0/18:2/18:2)	TG	2.41538	3.05213	1.83872	3.26446	2.30519	2.32557	3.6313	3.63307	0.0221264	0.0259708	0.0254478	0.0262927	0.0164498	0.107509	0.0438186	0.0473338
TG(11:0/18:2/18:3)	TG	0.462548	0.968624	0.326951	1.04965	0.626597	0.48445	1.12732	1.45806	0.00128526	0.000970467	0.00441564	0.00546623	0.000715062	0.0196103	0.00907769	0.00850128
TG(12:0/14:0/14:0)	TG	0.826314	0.177929	1.00384	1.36059	0.833725	0.175949	1.1071	0.812147	0.0211462	0.0141765	0.0199499	0.0114455	0.017578	0.0137013	0.0138147	0.0101833
TG(12:0/18:2/18:2)	TG	64.3024	44.0603	62.2976	119.497	27.2719	51.9534	51.023	96.7704	1.105	1.66252	2.54478	3.01613	0.424993	7.31601	3.7755	3.70565
TG(12:0/18:2/18:3)	TG	10.493	9.9119	8.07691	24.1108	3.64942	8.42997	8.82313	18.5461	0.150609	0.0915644	0.270571	0.471016	0.0270227	1.70311	1.15953	0.672924
TG(14:0/10:1/10:1)	TG	0.125875	0.108061	0.149336	0.293032	0.0933297	0.166674	0.119471	0.188154	1.59556e-05	0.000119943	0.000105975	0	0	0.000502609	0.000328885	0.000452148
TG(14:0/18:2/18:2)	TG	331.88	212.195	352.222	507.578	159.316	263.442	260.602	411.971	13.1136	21.8215	21.3842	25.8176	4.13088	48.3503	54.0815	30.9246
TG(14:0/18:2/22:6)	TG	14.9112	11.1655	18.2428	24.3152	9.46732	11.9603	11.4369	19.8091	0.057476	0.0680015	0.0440156	0.0442375	0.0373216	0.132237	0.0956042	0.0858471
TG(15:0/14:0/16:0)	TG	0.288637	0.0325438	0.31949	0.301566	0.296427	0.190823	0.320964	0.268115	0.0377179	0.0271103	0.0181916	0.0311658	0.0287612	0.0239636	0.0288853	0.0300505
TG(15:0/14:0/16:1)	TG	0.176725	0.0697761	0.152104	0.225483	0.244428	0.0369134	0.18609	0.0927027	0.00204115	0.0260353	0.0110582	0.00663223	0.0185455	0.0667598	0.0180887	0.0159457
TG(15:0/14:0/18:3)	TG	1.27542	1.12073	1.30323	1.62021	0.90959	1.19778	1.21493	1.57229	0.0903696	0.0770096	0.191653	0.181755	0.0539131	0.605232	0.245879	0.110772
TG(15:0/16:0/16:0)	TG	5.29862	4.223	5.40065	6.47243	3.34122	4.1673	4.53142	5.4849	0.128394	0.111107	0.19634	0.168453	0.0576925	0.427688	0.301609	0.211506
TG(15:0/16:0/16:1)	TG	2.63212	1.63471	2.80742	4.75967	1.40587	1.90035	2.0053	2.89383	0.223676	0.142689	0.234562	0.24786	0.0961857	0.538363	0.495093	0.32249
TG(15:0/16:0/18:1)	TG	28.4677	19.7736	31.9611	40.6375	13.2922	18.916	24.5777	32.3837	0.608969	0.740857	1.2915	1.34396	0.235079	5.08613	2.85321	2.10446
TG(15:0/16:0/18:2)	TG	45.9839	35.3602	51.0944	63.0536	30.6858	38.4707	43.899	48.896	1.73086	2.0667	3.25691	2.87089	0.522502	7.34057	4.8901	3.93742
TG(15:0/18:1/18:2)	TG	109.619	78.9191	127.676	168.031	60.1072	89.1555	97.3288	136.983	2.4407	2.25095	4.35127	3.97988	0.945039	12.076	7.57259	5.97698
TG(15:0/18:2/18:2)	TG	73.6597	63.2489	84.2468	106.66	47.1627	67.6672	72.5008	83.6201	1.36333	1.592	2.95516	2.4691	0.567288	5.63473	3.49489	3.28052
TG(15:0/18:2/18:3)	TG	10.318	8.36577	25.7518	13.1011	4.9818	8.63383	26.0891	25.985	0.107913	0.307221	0.593044	0.511059	0.0626246	1.24704	0.787086	0.357851
TG(15:0/18:2/20:5)	TG	1.389	0.850785	1.74968	2.13584	0.668165	1.02717	2.05151	1.576	0.00363803	0.0101712	0.00809501	0.00819459	0.00315958	0.030323	0.0163657	0.0161046
TG(15:0/18:2/22:6)	TG	4.79846	3.73242	6.19848	5.98324	1.88951	4.08243	1.9485	5.01219	0.0134842	0.0197275	0.0187428	0.0114591	0.00966203	0.0221759	0.0154081	0.0295737
TG(15:0/18:3/18:3)	TG	4.52336	3.55608	5.24061	11.8811	2.17164	4.57764	9.44407	5.18121	0.0511166	0.0570369	0.0262525	0.0626709	0.0345626	0.0848826	0.133595	0.167933
TG(15:0/18:3/22:6)	TG	0.646671	0.53337	0.71395	2.12262	0.287181	0.850084	0.47461	0.868519	0.00018973	0.00323991	0.0028244	0.00304192	0.00137268	0.00748659	0.00330455	0.00612399
TG(16:0/10:0/16:0)	TG	0.948229	0.719156	1.37062	2.22839	0.915912	0.771427	1.20145	1.24167	0.0247798	0.022144	0.0241201	0.0289532	0.0210513	0.0697757	0.0671898	0.0388179
TG(16:0/10:0/18:2)	TG	12.9522	10.2378	13.4174	27.921	7.91841	10.8579	11.716	17.4317	0.137539	0.184268	0.230338	0.364868	0.0914237	1.09651	0.814363	0.557569
TG(16:0/10:1/18:2)	TG	2.17259	3.58282	1.95786	3.78249	1.17591	1.78836	2.15067	2.22238	0.0183721	0.0148709	0.0231947	0.0178362	0.0100721	0.116639	0.0553963	0.0453869
TG(16:0/11:3/16:0)	TG	0.413991	0.648619	0.142477	0.36635	0.23289	0.455927	0.397017	0.406677	0.00264026	0.000819973	0.000358079	0.000373691	0.000305753	0.00513799	0.000373626	0.00120069
TG(16:0/11:3/18:2)	TG	0.571959	1.03381	0.260285	0.549766	0.264421	0.644912	0.725875	0.685937	0.000576953	0.000228105	0.00108953	0.000206731	0.000468456	0.00399849	0.000706043	0.00132386
TG(16:0/11:4/16:0)	TG	0.638335	1.32465	0.270634	0.591833	0.366049	0.753929	0.726452	0.865083	0.000545375	0.000434281	0.000887755	6.78697e-05	0.000794619	0.00544231	0.000444073	0.00164887
TG(16:0/12:0/18:2)	TG	39.0441	27.0697	46.8947	71.4791	26.8689	33.7461	35.5236	52.2858	1.67099	2.56484	3.31525	4.98978	0.856034	11.9259	9.9313	6.21008
TG(16:0/14:0/14:0)	TG	3.8346	2.51057	3.90488	5.48804	3.24323	3.17163	3.99327	3.48819	0.0928037	0.151267	0.122089	0.195736	0.0520423	0.507931	0.43171	0.271236
TG(16:0/14:0/16:0)	TG	7.84217	7.76237	11.2887	11.2573	10.9451	8.79306	10.2239	0.0234775	0.387486	0.618742	0.591435	0.609741	0.207867	1.04943	1.13049	0.787484
TG(16:0/14:0/16:1)	TG	26.2795	15.8874	28.2066	47.7409	13.308	20.9196	21.7377	33.5818	0.841636	1.03281	1.25609	2.07817	0.420269	8.10206	6.30689	3.46594
TG(16:0/14:0/18:1)	TG	77.0879	56.9725	90.0951	118.367	49.3834	63.0301	68.4575	6.16749	3.95819	5.13827	5.92642	8.31947	1.91049	18.5186	18.695	10.9805
TG(16:0/14:0/22:6)	TG	2.79154	1.55281	3.34893	3.36783	3.57435	2.19433	3.13262	1.37819	0.0311392	0.0897585	0.0858385	0.0962121	0.026059	0.314693	0.210361	0.113474
TG(16:0/14:2/22:6)	TG	7.86613	5.69307	8.08052	15.9737	4.07695	9.10804	6.87752	13.6519	0.0251087	0.0463089	0.0571318	0.0709238	0.0177386	0.18737	0.137107	0.129963
TG(16:0/14:3/18:2)	TG	2.33723	1.99993	2.07218	6.12987	1.34186	2.1777	2.02552	4.0417	0.0527832	0.0964662	0.0924569	0.175918	0.0290636	0.572753	0.380494	0.254283
TG(16:0/14:4/18:2)	TG	0.450878	0.331539	0.475565	1.14388	0.283862	0.359072	0.359568	0.519328	0.0107825	0.0142603	0.0136392	0.0302427	0.00518534	0.194193	0.0528453	0.0441023
TG(16:0/16:0/16:0)	TG	3.90337	3.65303	4.9855	7.58181	3.53246	3.8602	3.95476	4.61471	0.0242535	0.0298622	0.0323881	0.0413055	0.0235268	0.113445	0.21507	0.255475
TG(16:0/16:0/16:0)	TG	28.1447	23.6097	36.594	43.5101	24.9327	26.5279	26.6571	30.4149	1.58832	2.46379	2.90487	2.54376	0.770808	3.80607	4.7547	3.16
TG(16:0/16:0/17:0)	TG	8.9665	8.11254	12.1659	16.0939	9.08799	7.98463	10.4838	9.80706	0.0734184	0.0743652	0.131926	0.0912576	0.0377751	0.454709	0.186263	0.171774
TG(16:0/16:0/18:1)	TG	232.889	147.091	216.243	268.272	162.003	154.513	180.602	188.34	16.4051	20.3295	26.6548	27.5958	6.52513	55.8015	54.5917	34.5137
TG(16:0/16:0/18:2)	TG	222.261	184.03	260.045	262.623	163.742	188.023	201.108	204.5	35.7224	47.0614	53.4303	51.5131	17.0602	98.0927	95.4668	63.2265
TG(16:0/16:0/19:0)	TG	1.46298	1.20012	2.58119	2.89066	1.31894	1.52938	1.87149	2.32082	0.00486167	0.00923384	0.0168197	0.0135101	0.00835436	0.026925	0.0250981	0.00766956
TG(16:0/16:0/23:0)	TG	0.243414	0.365135	0.535853	0.563468	0.282597	0.274204	0.332323	0.380209	0.0189555	0.0139894	0.0143011	0.00924793	0.013466	0.0117048	0.00650313	0.00957006
TG(16:0/16:0/24:0)	TG	0.615203	0.586106	0.996136	1.22597	0.585662	0.70397	0.825418	0.802117	0.0195541	0.01744	0.0118709	0.00904296	0.0152442	0.0150523	0.0162009	0.0120692
TG(16:0/16:1/16:1)	TG	140.671	97.8653	151.743	225.724	90.1687	117.941	122.166	168.187	8.20365	12.4114	13.6151	15.6779	4.45591	32.2745	31.6915	19.7202
TG(16:0/16:1/18:2)	TG	378.25	248.132	386.036	555.896	187.766	301.764	289.483	431.288	23.8369	22.6815	33.9572	35.2108	11.2588	76.4217	73.1553	36.0102
TG(16:0/16:1/18:3)	TG	15.1508	9.04272	16.859	17.1396	6.54257	10.193	9.2756	17.9239	1.68196	2.00328	2.29935	3.28897	0.609617	5.73708	4.78806	3.09775
TG(16:0/17:0/18:1)	TG	40.753	35.1764	54.6202	72.3325	39.837	31.375	56.8858	68.0551	0.484412	0.390208	0.837665	0.722134	0.166218	3.9944	1.72821	1.41842
TG(16:0/17:0/18:2)	TG	85.0384	68.255	95.7509	118.667	52.497	54.1408	71.7018	81.3355	1.16969	1.29553	2.42609	2.14333	0.523825	7.53436	3.31632	3.53745
TG(16:0/17:0/22:6)	TG	1.30564	1.16252	2.02163	1.43511	0.915121	1.36402	1.23803	0.888301	0.0256131	0.0169004	0.0260714	0.0021026	0.0147264	0.0466172	0.0338893	0.0234153
TG(16:0/17:1/22:6)	TG	1.786	1.8612	11.8482	8.63832	2.56756	1.36577	2.47221	6.66434	0.00903696	0.0356454	0.00669287	0.0319259	0.00569744	0.0962913	0.0647958	0.0121063
TG(16:0/18:1/18:1)	TG	449.002	347.919	512.027	712.748	301.563	388.47	400.868	502.426	18.598	14.0496	23.9793	25.1254	6.81804	62.6112	61.3029	32.3814
TG(16:0/18:1/18:2)	TG	942.081	683.804	1004.56	1200.13	578.945	759.178	810.592	914.118	53.3753	50.6302	72.662	60.8248	26.2101	120.705	109.419	74.3117
TG(16:0/18:1/18:3)	TG	1046.18	776.738	1121.41	1361.79	613.084	886.306	879.906	1029.93	57.4102	67.3565	91.7931	76.8964	29.9139	125.932	128.964	91.0917
TG(16:0/18:1/19:0)	TG	14.7549	14.7091	25.8601	31.4186	18.1681	14.1389	24.183	26.1614	0.0761595	0.0588859	0.117301	0.0966465	0.0349594	0.445702	0.130063	0.133499
TG(16:0/18:1/20:1)	TG	300.099	226.82	300.237	380.653	231.941	233.257	314.514	301.734	2.27623	1.50472	3.85841	3.43964	0.926331	22.4216	10.363	7.16099
TG(16:0/18:1/22:0)	TG	8.7383	8.44935	14.6448	18.6781	7.45136	9.19553	10.5704	15.1935	0.0396696	0.0232405	0.0578158	0.0262113	0.000952031	0.127651	0.0422487	0.0462081
TG(16:0/18:1/22:5)	TG	75.1498	47.4534	70.7091	97.0924	55.3261	57.5443	74.7054	77.7042	0.267973	0.241219	0.382421	0.367175	0.275518	1.65125	0.930532	0.696366
TG(16:0/18:1/22:6)	TG	38.9503	31.5409	46.5698	55.5295	36.5179	29.0827	35.7642	38.4017	0.407222	0.269168	0.275198	0.224242	0.234323	0.588856	0.575745	0.387385
TG(16:0/18:1/23:0)	TG	1.16809	1.18842	2.54389	2.43032	0.836095	1.52851	1.69435	1.66701	0.0176309	0.0130886	0.0165139	0.0132821	0.0132789	0.0114578	0.0126766	0.0146743
TG(16:0/18:1/24:0)	TG	2.59044	2.40025	4.9506	6.23324	2.1906	3.239	3.4686	4.53391	0.023179	0.0135272	0.0344802	0.00612185	0.00339201	0.0529766	0.0124411	0.027799
TG(16:0/18:1/24:1)	TG	16.2241	14.1742	27.4726	30.8537	7.47744	15.6175	15.2684	35.6156	0.0575856	0.0319906	0.107001	0.0284646	0.0181732	0.162669	0.0404238	0.0585911
TG(16:0/18:2/18:2)	TG	0.242893	0.107978	1.67988	2.92551	0.800534	1.28965	1.43538	2.77217	0.0926502	0.0109688	0.00683972	0.016886	0.04146	0.0186278	0.0971152	0.0519692
TG(16:0/18:2/18:3)	TG	279.363	215.287	298.672	418.274	148.569	238.944	228.93	298.391	8.78039	11.6675	17.5539	18.7863	4.80551	37.6104	32.5156	24.8721
TG(16:0/18:2/19:0)	TG	44.8377	42.673	63.3927	73.7869	47.2734	43.0729	57.8485	52.1464	0.210256	0.171132	0.410987	0.223291	0.0960345	5.11206	1.88069	0.534922
TG(16:0/18:2/22:6)	TG	60.4574	51.0471	84.8124	79.1235	64.4931	45.8552	58.5321	55.6662	0.572348	0.485663	0.588819	0.295097	0.372838	0.794649	2.39599	0.773578
TG(16:0/18:2/23:0)	TG	4.8318	4.94843	9.60276	11.2886	4.07853	6.6661	6.90351	7.89115	0.0139096	0.0145978	0.0229935	0.00670553	0.0116613	0.0674285	0.0216836	0.0263554
TG(16:0/18:2/23:0)	TG	2.48207	2.50555	4.35734	5.65271	1.79231	2.8304	2.88617	3.9349	0.0378057	0.0293892	0.048904	0.0277723	0.0218449	0.175906	0.0347723	0.018621
TG(16:0/18:2/24:0)	TG	4.70363	4.95511	8.97221	10.9076	4.17653	7.46929	6.33648	7.56054	0.0246263	0.02309	0.0592642	0.0177547	0.0157903	0.0943808	0.0295918	0.0396523
TG(16:0/18:2/24:1)	TG	76.0771	60.491	76.6296	151.444	26.0549	36.5634	35.0326	56.8178	0.0974965	0.0793959	0.264939	0.0990762	0.0492078	0.281668	0.0776882	0.150848
TG(16:0/18:3/22:6)	TG	15.8281	12.4943	21.3836	26.3464	10.8819	12.1003	13.3141	14.7942	0.0561603	0.0473624	0.0530682	0.0372197	0.039816	0.125332	0.0862636	0.0742322
TG(16:0/19:0/22:6)	TG	0.284469	0.35168	0.391812	0.705897	0.372924	0.214096	0.352251	0.203106	0.00109053	0.000266803	0.000190768	0.000648156	0.000101534	0.00104206	0.000809849	0.000315603
TG(16:0/20:4/22:6)	TG	0.739306	0.81911	1.11009	0.971765	1.04314	0.635375	0.850544	0.423858	0.00644494	0.00151633	0.00105191	0.00902531	0.00646844	0.0123953	0.00743523	0.00788411
TG(16:0/20:5/22:6)	TG	0.945728	0.83992	1.22261	1.66829	0.742845	0.780264	0.730399	0.943558	0.0047893	0.0021714	0.0026695	0.00194243	0.00520612	0.00244276	0.00256475	0.00403807
TG(16:0/22:6/22:6)	TG	1.73599	1.63137	2.86037	2.39426	2.2072	1.16278	1.45849	1.25653	0.00543621	0.00528876	0.0054939	1.13112e-05	0.00606405	0.003948	0.00353414	0.00502739
TG(16:0/8:0/18:1)	TG	2.41017	0.898422	2.73161	7.21763	1.00837	2.04647	1.19663	3.44176	0.024714	0.022101	0.0270974	0.021379	0.0172756	0.116475	0.0554159	0.0455061
TG(16:0/9:0/18:1)	TG	0.54643	0.497016	0.480259	1.01816	0.430139	0.422942	0.43514	0.475215	0.0218852	0.0113149	0.0151419	0.0091244	0.00890615	0.0206475	0.0106436	0.00913169
TG(16:0/9:0/18:2)	TG	1.44318	1.04551	2.08301	3.44956	0.964908	2.2162	2.14008	2.32825	0.00803918	0.00636157	0.00969631	0.0081878	0.00614719	0.0211797	0.0136656	0.013628
TG(16:0e/16:0/16:0)	TG	1.1535	0.837413	1.24788	1.90146	0.581315	1.06392	1.2361	1.84811	0.00738789	0.011975	0.016699	0.0139812	0.00326729	0.0965369	0.0398155	0.0240112
TG(16:0e/16:0/18:0)	TG	0.612389	0.551339	0.684588	0.949289	0.460169	0.658649	0.784407	0.862297	0.00183831	0.000358819	3.53251e-05	4.19299e-05	0.00159377	0.0181092	0.00640109	0.00584587
TG(16:0e/16:0/18:2)	TG	3.40008	2.45541	3.32246	4.04692	1.54496	3.30199	2.98436	3.5532	0.0374329	0.0511892	0.074553	0.0720098	0.0190293	0.416771	0.195624	0.124956
TG(16:0e/16:0/20:0)	TG	0.28822	0.275126	0.300237	0.445197	0.225461	0.314275	0.408665	0.43751	0.000104952	0.000611433	0.00113419	0.000272836	0.000266448	0.0039671	0.000638931	0.00114891
TG(16:0e/18:0/22:5)	TG	0.676473	0.728683	0.890241	1.08523	0.753829	0.826548	0.977139	1.04757	0.0022543	0.00579184	0.00365523	0.00195601	0.00259456	0.0149705	0.00793562	0.00557304
TG(16:0p/16:0/18:2)	TG	0.215071	0.491583	0.586635	0.906621	0.263947	0.721469	0.580315	0.902881	0.0151179	0.0313671	0.00589222	0.0348579	0.00889293	0.171266	0.0892855	0.054459
TG(16:0p/18:2/18:2)	TG	0.500269	0.564126	0.575323	0.3601	0.391732	0.566956	0.556632	0.603097	0.0504368	0.067335	0.108329	0.11755	0.0318225	0.21439	0.16562	0.12301
TG(16:1/10:0/16:1)	TG	5.49869	4.41773	6.14312	12.3679	3.78851	5.85592	4.76728	8.02396	0.0152889	0.00722153	0.0131745	0.0195736	0.01069	0.095841	0.0485674	0.0398377
TG(16:1/10:0/18:2)	TG	3.93255	3.07553	4.02041	9.39313	2.21589	3.5811	3.18846	5.36602	0.0245605	0.0246164	0.0351441	0.0449433	0.0281943	0.176862	0.118524	0.0764175
TG(16:1/12:0/18:2)	TG	16.693	12.3773	16.7026	41.1543	7.24353	12.0653	13.3334	30.6471	0.246921	0.285937	0.375179	0.690235	0.135076	3.72965	1.86303	1.70847
TG(16:1/16:1/16:1)	TG	111.703	61.3601	116.124	199.041	42.7136	87.0907	74.4551	157.786	3.41874	3.27645	4.35328	6.84805	1.27385	21.3981	17.2174	10.1727
TG(16:1/18:1/18:3)	TG	412.219	212.028	447.888	615.512	151.967	332.911	309.315	488.031	11.3395	13.0112	17.8376	19.0442	5.89397	37.392	35.0667	21.1108
TG(16:1/18:2/18:3)	TG	172.557	119.01	167.266	292.792	59.5303	146.989	120.337	269.973	3.74548	5.44786	8.59994	7.95433	1.80107	17.1539	12.4234	9.41908
TG(16:1/18:3/18:3)	TG	26.9464	18.378	28.5676	58.0896	10.1786	30.9463	19.485	51.4406	0.400205	0.735052	1.03541	1.05822	0.24037	2.02517	1.48371	1.26241
TG(16:1/9:0/18:2)	TG	1.0764	1.29456	0.399032	1.46636	0.305989	0.610352	1.14272	1.77939	0.00240123	0.000721078	0.00335951	0.000333376	0.00157147	0.00686157	0.00157751	0.00340766
TG(17:0/18:1/18:1)	TG	64.3024	48.7488	78.4466	111.576	41.1884	53.0209	72.4334	88.6815	0.42323	0.255409	0.652187	0.477803	0.268715	5.10797	1.26648	1.05077
TG(17:0/18:1/18:2)	TG	28.822	150.768	216.363	71.3469	123.834	39.0482	28.0434	57.3936	0.576076	0.376448	0.890974	0.91054	0.232811	3.70645	1.58457	1.24321
TG(17:0/18:1/22:5)	TG	0.286865	0.231417	1.86279	1.81613	1.24782	0.223283	1.44597	1.36983	0.00329813	0.000845127	0.000875484	0.000691864	0.00122925	0.00198287	0.00103709	0.000342356
TG(17:0/18:1/22:6)	TG	4.26078	3.15075	4.93255	4.79452	2.83466	3.52072	3.25199	5.16264	0.0104777	0.00200565	0.00484413	0.00561961	0.00149778	0.00426733	0.00733123	0.00626967
TG(17:0/18:1/22:6)	TG	3.91796	2.91423	4.38141	3.96759	1.33159	4.03956	3.26355	3.18822	0.103264	0.0664535	0.123356	0.0554496	0.0285345	0.148886	0.0920524	0.0967734
TG(17:0/18:2/20:4)	TG	2.16634	1.42661	2.75087	2.45075	1.60502	2.33957	1.79543	2.37468	0.0256131	0.0154535	0.0251058	0.0104438	0.0140556	0.0599774	0.0171134	0.033878
TG(18:0/16:0/16:0)	TG	3.05517	2.80308	4.06493	5.06256	2.8236	2.55655	3.38196	3.0257	0.00538139	0.00634437	0.0103058	0.00483232	0.0041649	0.0541775	0.084262	0.116335
TG(18:0/16:0/16:0)	TG	37.3352	33.6386	47.2918	56.3588	37.5374	34.6648	43.4947	39.1818	0.310077	0.360539	0.613965	0.452012	0.174268	2.14799	1.13736	0.853968
TG(18:0/16:0/17:0)	TG	3.31151	3.56695	5.84108	7.40633	4.62302	3.27574	6.01879	5.00197	0.0207427	0.014327	0.0244419	0.0138997	0.020919	0.0580805	0.0231161	0.0249913
TG(18:0/16:0/18:0)	TG	0.708775	0.793119	1.11419	1.488	0.870867	0.658736	1.05319	0.942629	0.000319287	0.00199038	0.00341986	0.00186506	0.000286856	0.00848826	0.00111362	0.00232961
TG(18:0/16:0/18:0)	TG	12.1707	13.5975	18.1345	23.606	23.0914	11.6541	19.5909	15.3328	0.0623662	0.0636372	0.0837463	0.0438031	0.0523636	0.20088	0.103159	0.082854
TG(18:0/16:0/18:1)	TG	187.874	188.794	270.033	262.743	181.76	154.863	244.429	237.747	2.69508	2.53904	5.00104	4.23236	0.982644	22.3124	11.6895	7.86954
TG(18:0/16:0/18:2)	TG	298.432	259.498	382.546	359.74	281.254	255.305	312.011	266.815	8.07866	11.2655	17.4695	14.2662	4.21025	22.4762	29.7095	18.025
TG(18:0/16:0/19:0)	TG	0.75379	0.903437	1.38867	1.69593	1.1688	0.814649	1.31697	1.068	0.00972114	0.0107001	0.011362	0.00688063	0.00938614	0.00909145	0.00959378	0.00814501
TG(18:0/16:0/22:6)	TG	8.49759	10.7142	12.1057	14.7958	17.5675	9.5805	15.3935	9.45416	0.0458755	0.0343555	0.0398917	0.0235508	0.0389845	0.0637575	0.0453492	0.0346196
TG(18:0/18:0/18:0)	TG	1.74953	2.28826	3.4801	4.04812	2.90579	2.2932	2.71192	2.91797	0.028113	0.0247239	0.0368138	0.000195736	0.0121923	0.025806	0.0304356	0.0195083
TG(18:0/18:0/18:1)	TG	60.322	62.7976	86.4008	114.881	85.6642	56.1619	91.8318	81.2704	0.178064	0.14744	0.32891	0.162209	0.105389	1.28402	0.500588	0.404999
TG(18:0/18:0/22:6)	TG	1.39108	2.00996	2.34534	2.1743	4.04613	2.15758	3.00266	1.49706	0.00405687	0.00203467	0.00437943	0.00148499	0.00438788	0.0056784	0.00312598	0.00375068
TG(18:0/18:1/18:1)	TG	149.112	159.543	207.819	206.012	198.355	137.714	215.259	162.615	0.5934	0.483943	1.36633	3.67582	0.39986	23.7862	11.0871	7.55963
TG(18:0/18:1/18:2)	TG	509.022	444.698	599.27	630.656	436.54	474.3	877.981	473.544	7.87472	6.72705	14.8704	9.83296	3.96459	30.7597	19.9764	13.9988
TG(18:0/18:1/18:3)	TG	547.159	825.88	603.121	695.32	454.637	486.987	617.571	550.254	7.52385	9.14354	17.0691	11.9383	5.16266	28.0167	17.1683	15.4027
TG(18:0/18:1/19:0)	TG	1.46715	1.48344	2.5836	3.53249	1.40508	1.70699	2.01878	2.81489	0.00609189	0.00168316	0.00885341	0.00241345	0.00132147	0.0278939	0.00530415	0.00855823
TG(18:0/18:1/19:0)	TG	3.27087	3.28446	5.7039	7.0794	3.51034	3.38686	4.62191	5.09391	0.00634846	0.010255	0.0219273	0.00460157	0.0174911	0.0482958	0.0139756	0.0186607
TG(18:0/18:1/20:1)	TG	58.9152	50.4621	68.0136	152.045	42.2868	54.2108	63.7595	91.6812	0.105786	0.077891	0.235166	0.117673	0.0509841	1.16134	0.37598	0.267527
TG(18:0/18:1/20:4)	TG	19.1209	13.1629	22.6832	23.7142	15.5523	10.9716	20.852	21.9452	0.0984394	0.0597888	0.095575	0.0521104	0.0694087	0.510388	0.129376	0.122904
TG(18:0/18:1/22:5)	TG	11.3266	8.05906	10.7496	11.9124	11.1269	6.78159	12.0722	9.72348	0.0906108	0.066475	0.135889	0.0138861	0.0419324	0.142199	0.110655	0.135883
TG(18:0/18:1/22:6)	TG	11.1391	11.6419	15.5353	12.6804	17.1012	8.6662	14.2768	9.7792	0.0475421	0.0259278	0.0412797	0.0186777	0.0293659	0.0724368	0.0459575	0.0525519
TG(18:0/18:1/24:0)	TG	0.615828	0.647533	1.38265	1.44833	0.726802	0.805025	1.02142	1.14137	0.00391433	0.00541561	0.00741506	0.00310436	0.000399105	0.0101968	0.00445054	0.00492012
TG(18:0/18:1/24:1)	TG	1.23061	1.04886	2.52343	2.56734	1.06132	1.42001	1.87437	1.99392	0.00384197	0.00123361	0.00632473	0.00136554	0.00137702	0.0184913	0.00414049	0.00571078
TG(18:0/18:2/19:0)	TG	9.66464	8.87558	15.8241	16.8031	9.58586	10.193	14.1998	13.0575	0.0294726	0.0370858	0.0523641	0.0808735	0.0423671	0.132919	0.151668	0.0423806
TG(18:0/18:2/20:0)	TG	20.3713	18.6872	41.4796	38.9668	16.0897	22.302	23.9231	29.1611	0.0524762	0.0376233	0.153934	0.0400567	0.0310667	0.281259	0.081868	0.104296
TG(18:0/18:2/24:0)	TG	1.7412	1.52606	2.98552	3.79331	1.59633	1.88635	2.3538	2.61986	0.0115763	0.007888	0.0203783	0.0126984	0.0118012	0.0267203	0.00585556	0.012293
TG(18:0/20:1/22:6)	TG	1.08682	0.789107	1.71959	1.82935	0.76355	1.0228	1.23418	1.14973	0.00116465	0.00033818	0.00200162	0.000100054	0.00140575	0.000901912	0.000281985	0.00055598
TG(18:0e/16:0/18:2)	TG	2.37891	1.92555	2.54389	3.45196	1.55049	2.39906	2.37305	3.31174	0.0126531	0.0175776	0.0304569	0.0194922	0.0081087	0.0931389	0.0471742	0.0326065
TG(18:0e/18:0/18:2)	TG	0.995953	1.03548	1.00733	1.4267	0.704675	1.22315	1.27076	1.56207	0.00439677	0.00684959	0.0135889	0.00650463	0.00394191	0.0200061	0.00770799	0.00998327
TG(18:0p/16:0/16:0)	TG	3.26253	2.47296	3.70874	5.47362	1.64532	3.29237	3.0479	5.41989	0.0232448	0.0269168	0.0447398	0.0382921	0.012969	0.323837	0.122586	0.065968
TG(18:0p/16:0/18:1)	TG	2.55292	2.19884	2.99996	4.19235	1.52125	2.8444	3.12492	4.43082	0.022565	0.0150859	0.0324283	0.0262792	0.00905733	0.300637	0.106986	0.0508037
TG(18:0p/16:0/18:2)	TG	0.722009	0.747571	0.814911	0.972607	0.723799	0.815874	0.958847	0.86109	0.0149863	0.0259493	0.0284452	0.0233743	0.0050455	0.106581	0.0351255	0.0283288
TG(18:0p/18:1/18:1)	TG	0.1786	0.212613	0.251982	0.288945	0.198592	0.227657	0.223539	0.635137	0.00410073	0.002223	0.00426276	0.00162887	0.000860002	0.0113022	0.0066503	0.00345269
TG(18:0p/18:1/18:2)	TG	1.73286	1.35641	1.89769	1.76805	1.03761	2.1777	1.71649	2.28831	0.0273016	0.0195168	0.0357074	0.0360795	0.0121281	0.299546	0.122233	0.0666964
TG(18:1/11:1/18:2)	TG	0.395964	0.395807	0.37677	0.673926	2.40476	0.400806	0.464406	0.4663	0.00487044	0.00764076	0.00952934	0.0113519	0.0164177	0.0328613	0.0191503	0.0169125
TG(18:1/12:0/14:0)	TG	5.71438	3.30452	6.48969	11.5963	2.93898	4.28192	4.47173	7.88465	0.108812	0.107538	0.122511	0.211482	0.0659127	0.867522	0.673468	0.301299
TG(18:1/13:0/18:2)	TG	1.70473	1.00122	1.73885	2.11541	0.46167	0.986048	0.937379	3.70922	0.0379153	0.0144624	0.0476568	0.0666209	0.0315769	0.140152	0.174705	0.173628
TG(18:1/13:0/18:2)	TG	14.5569	8.10251	10.7857	15.8776	5.7523	9.27428	9.77139	13.3361	0.671906	0.737847	0.922155	1.24392	0.307454	3.14557	2.03885	1.65549
TG(18:1/17:1/18:2)	TG	149.32	122.77	89.3972	208.055	36.5574	57.4218	57.5405	166.98	1.03088	0.958642	1.77953	1.47006	0.40723	3.74466	3.43406	2.29915
TG(18:1/18:1/18:1)	TG	269.36	266.936	418.887	438.707	226.331	219.783	355.428	397.112	7.83963	4.29551	10.0685	7.53625	2.85156	19.8696	15.6318	10.5872
TG(18:1/18:1/18:2)	TG	567.479	502.197	649.45	717.796	410.856	501.248	595.044	565.949	27.9157	11.8868	22.9131	15.5693	10.5011	36.7916	25.7064	33.8382
TG(18:1/18:1/22:6)	TG	10.5139	7.96127	12.6232	15.0122	8.45579	6.64773	8.5709	11.3116	0.0776288	0.0709683	0.0778119	0.0956013	0.0824287	0.130695	0.174921	0.119156
TG(18:1/18:1/23:0)	TG	1.2775	1.99157	2.77132	2.15748	1.02497	1.59063	1.1562	2.09143	0.0183064	0.0131596	0.0257093	0.0100814	0.00952031	0.0231858	0.0115639	0.0173363
TG(18:1/18:1/24:0)	TG	2.009	1.9899	4.1263	4.46519	1.69906	2.88377	2.92564	4.01848	0.00384197	0.00825993	0.0293303	0.00570513	0.00645143	0.030364	0.0108222	0.0111395
TG(18:1/18:2/18:2)	TG	995.015	772.225	1062.56	1152.18	695.903	855.858	922.169	929.628	29.5384	26.0568	41.6619	28.9532	16.533	51.1206	49.372	37.0433
TG(18:1/18:2/20:4)	TG	72.2946	53.9889	102.429	171.396	61.4348	58.2792	90.9654	136.333	0.510289	0.385908	0.586405	0.350751	0.250763	3.14421	0.755493	0.64286
TG(18:1/18:2/21:0)	TG	15.8594	13.0209	29.8071	33.1614	10.2418	17.6911	17.5115	24.9541	0.0410731	0.0237994	0.0510565	0.0286817	0.0197285	0.186141	0.0404238	0.0644185
TG(18:1/18:2/22:1)	TG	25.4667	21.8463	31.5399	32.6205	12.7232	28.1728	22.4886	29.0683	0.101488	0.0698074	0.257495	0.109596	0.0562941	0.514209	0.21507	0.222101
TG(18:1/18:2/22:3)	TG	13.0668	8.53292	12.8037	14.1828	9.74391	9.70299	10.7918	11.3208	0.0680239	0.0444815	0.135829	0.0665395	0.0547257	0.298454	0.125373	0.121222
TG(18:1/18:2/22:4)	TG	32.0626	26.8524	33.6337	49.4717	30.2907	22.8882	21.5356	31.7429	0.154271	0.106893	0.0890974	0.0868732	0.0876632	0.39248	0.415423	0.213095
TG(18:1/18:2/22:5)	TG	19.5585	19.9074	25.6675	23.5339	26.8135	16.44	27.5813	19.2984	0.101817	0.100035	0.113559	0.0668517	0.0695031	0.190099	0.191954	0.144756
TG(18:1/18:2/22:6)	TG	50.5166	43.2747	60.998	54.4958	46.6175	31.7688	47.0759	37.0087	0.305471	0.210282	0.24965	0.152028	0.215237	0.336392	0.363225	0.314676
TG(18:1/18:2/23:0)	TG	4.58589	3.26441	8.397	9.03736	3.27958	4.89787	3.75837	7.2875	0.0171025	0.0122631	0.0348423	0.0111238	0.00634372	0.0325884	0.0125471	0.0267262
TG(18:1/18:2/23:1)	TG	2.99369	2.50722	4.89524	5.75367	1.95352	3.40961	3.4455	4.6565	0.0094558	0.00722798	0.0183325	0.0066553	0.00402506	0.035577	0.00835752	0.0135883
TG(18:1/18:2/24:0)	TG	9.47083	9.46059	18.7483	13.4016	7.70741	13.2115	13.1697	21.778	0.0112584	0.000432346	0.0734264	0.013012	0.0117974	0.07417	0.0163579	0.0352156
TG(18:1/18:2/24:1)	TG	13.1606	11.2491	22.9961	28.7383	7.77616	15.1101	14.7293	20.8029	0.0413362	0.0309156	0.106619	0.0347629	0.0162023	0.176862	0.0492542	0.0618756
TG(18:1/20:4/22:6)	TG	0.885604	0.559278	1.13982	1.18186	0.875608	0.409031	0.837644	0.668663	0.00942291	0.000706458	0.00175781	0.00110193	0.00657993	0.00206884	0.00436812	0.00125989
TG(18:1p/16:0/16:0)	TG	0.86664	0.623463	0.888677	1.04629	0.448789	0.725406	0.807126	0.988136	0.0158328	0.0314531	0.0328709	0.0414684	0.0092274	0.206475	0.103512	0.0555185
TG(18:1p/18:0/18:1)	TG	0.672722	0.695504	0.807571	0.940155	0.471548	0.724881	0.798558	1.07915	0.00683309	0.00311736	0.00753375	0.00459342	0.00289502	0.111139	0.0354395	0.0170052
TG(18:1p/18:1/18:2)	TG	0.742849	0.761611	0.0514795	0.881019	0.597516	1.01055	0.762553	0.897495	0.0283981	8.15029e-05	0.0357275	0.0426222	0.0117804	0.204428	0.0987635	0.0724443
TG(18:1p/18:2/20:0)	TG	0.426495	0.466344	0.521173	0.532578	0.41789	0.571505	0.594081	0.590653	0.00197953	0.00378168	0.00795822	0.00455541	0.00217126	0.0139606	0.00798664	0.0077967
TG(18:2/10:1/18:2)	TG	1.62241	3.3087	1.29361	5.43155	0.676937	1.50663	1.47197	4.03613	0.0182954	0.0206047	0.0274997	0.0242295	0.0126402	0.10246	0.0337126	0.0591474
TG(18:2/10:3/17:1)	TG	0.193814	0.419626	0.0962322	0.150963	0.101153	0.242881	0.267245	0.24239	5.33314e-05	0	0	0	6.22278e-05	0.000247552	0	0.000105951
TG(18:2/10:4/21:0)	TG	0.182143	0.258328	0.0967617	0.249762	0.0824242	0.166587	0.258581	0.202921	0.000139666	7.50531e-05	0.000124664	4.94906e-05	0.000252275	0.00193374	0.000527864	0.000366592
TG(18:2/13:0/18:2)	TG	11.7747	12.1517	13.3813	14.1708	7.72479	10.0705	12.2744	13.8655	0.22565	0.235629	0.0535309	0.415634	0.070259	0.971237	0.598507	0.500753
TG(18:2/13:0/22:6)	TG	1.19519	0.598475	0.885789	3.66831	0.171407	0.79785	0.520338	1.09122	0.000865758	0.000735052	0.00132067	0.00100922	0.000316147	0.0146293	0.0050726	0.00579952
TG(18:2/14:1/18:2)	TG	137.545	77.4147	112.911	255.171	36.3441	100.442	77.3528	143.298	2.44728	4.47825	3.36353	6.46934	0.904788	17.5497	11.8681	8.55823
TG(18:2/14:4/23:0)	TG	0.283322	0.170157	0.230563	0.305652	0.138375	0.211821	0.159519	0.172738	0.0350207	0.0432776	0.0585198	0.0528569	0.0170205	0.0584216	0.0729002	0.0488701
TG(18:2/17:1/18:2)	TG	69.6167	55.652	81.2264	104.424	35.9647	59.2766	59.437	79.2087	0.653705	0.732687	1.35467	1.38183	0.174986	3.1715	1.89168	1.83428
TG(18:2/17:1/20:4)	TG	1.01669	1.53776	1.98313	1.32574	1.12533	0.89243	0.894443	1.78124	0.0142692	0.00505657	0.00963998	0.00675439	0.00154067	0.00625293	0.00312794	0.00559556
TG(18:2/17:1/22:6)	TG	1.15455	1.20263	1.7593	1.99161	0.963327	1.07179	1.23033	1.05872	0.00124732	0.000367634	0.00168559	0.00404775	0.000915181	0.00227491	0.00605179	0.00241569
TG(18:2/18:2/21:0)	TG	14.5777	7.46067	13.4294	17.1516	7.91051	14.2701	12.2551	17.8867	0.0220387	0.0258418	0.0599079	0.0223834	0.0097962	0.118863	0.0405219	0.0461286
TG(18:2/18:2/21:1)	TG	4.21076	3.33962	4.57996	5.73083	2.67582	3.88645	3.23563	4.25808	0.0114404	0.00440515	0.00502719	0.0129618	0.0042197	0.0436968	0.0170192	0.0181707
TG(18:2/18:2/21:1)	TG	0.138692	0.0442024	0.162332	0.0669839	0.137426	0.0814824	0.265031	0.166237	0.0113	0.00998845	0.00122471	0.0123944	0.00738306	0.0446248	0.0180141	0.0192964
TG(18:2/18:2/22:6)	TG	3.31463	3.05296	4.03124	4.7825	2.12975	1.99309	2.4674	2.52885	0.00544498	0.00498993	0.00701272	0.00365546	0.00443135	0.00772132	0.00701922	0.00917804
TG(18:2/18:2/22:6)	TG	53.3926	48.8909	77.857	71.2748	47.1311	40.6143	46.6812	48.5895	0.202449	0.194351	0.203985	0.139404	0.143315	0.244549	0.20781	0.247529
TG(18:2/18:2/23:0)	TG	1.84227	1.94477	3.79899	4.29091	1.33949	2.44281	2.41445	3.14643	0.00747122	0.00542636	0.0172944	0.00527891	0.00335044	0.0219166	0.0032653	0.0105965
TG(18:2/18:2/23:1)	TG	1.86937	1.69154	2.83149	3.18994	1.32606	2.13746	2.00626	2.52142	0.00650196	0.00506087	0.0115672	0.0058463	0.00323328	0.0204701	0.0062912	0.0117275
TG(18:2/20:4/22:6)	TG	1.80685	0.881707	3.1925	2.02045	0.464831	2.45418	0.52958	1.92612	0.00660283	0.000185881	0.00123175	0.000248946	0.00491889	0.00181501	0.000740776	0.00467113
TG(18:2/22:6/22:6)	TG	1.43797	1.18007	2.01321	1.84738	1.25888	0.809574	0.94768	1.4237	0.00321041	0.00161931	0.00307586	0.00166959	0.00320115	0.00249189	0.00145114	0.00362354
TG(18:2p/16:0/16:0)	TG	0.818499	0.849113	0.827065	1.1196	0.535638	0.872482	0.898198	1.12001	0.0650634	0.146322	0.126112	0.152164	0.032843	0.405717	0.270604	0.179058
TG(18:2p/16:0/18:1)	TG	1.41401	0.993697	1.02117	1.04773	0.833725	1.39814	0.898871	1.2686	0.0586821	0.103926	0.0835854	0.104329	0.0281943	0.368735	0.224489	0.14661
TG(18:3/10:4/23:0)	TG	0.604157	1.04969	0.178818	0.401206	0.42595	0.546307	0.964624	0.47893	0.000449984	0.00103217	0.000610948	0.00318716	0.00153708	0.00290948	0.000138442	0.000900455
TG(18:3/12:1/18:2)	TG	2.74882	1.87875	2.37903	4.52289	1.14114	0.833372	2.21132	4.17729	0.0138065	0.0219935	0.0261318	0.0382514	0.0103083	0.166899	0.0845956	0.0686565
TG(18:3/13:0/18:2)	TG	6.29061	2.60334	2.88685	6.2104	0.763945	5.59431	2.12082	3.78538	0.039253	0.00056263	0.070771	0.0869139	0.0222796	0.230493	0.132182	0.12791
TG(18:3/14:1/18:2)	TG	26.4983	19.1719	22.948	54.1352	1.81681	26.1517	22.2383	44.0203	0.462922	0.535326	0.669689	1.77411	0.195773	1.91054	2.87872	2.172
TG(18:3/14:2/18:2)	TG	3.82626	2.09437	3.39225	7.64912	1.39244	3.85757	2.43274	6.34394	0.0577611	0.0913279	0.104024	0.0714397	0.0329753	0.158848	0.297684	0.328317
TG(18:3/17:1/18:2)	TG	15.3592	13.4053	20.1441	24.7238	8.69286	14.0689	12.6691	16.7352	0.148876	0.17354	0.317846	0.26985	0.0554627	0.542594	0.340462	0.342091
TG(18:3/17:1/22:6)	TG	0.632708	0.731608	0.783022	1.3017	0.447287	0.646749	0.617763	0.946344	0.00048814	0.000987451	0.00162685	0.00122084	0.000566343	0.00456756	0.0021821	0.00340501
TG(18:3/17:1/22:6)	TG	0.510689	1.01459	0.400235	0.576328	0.354195	0.483925	0.528329	0.643681	0.00048814	0.000987451	0.00162685	0.00122084	0.000566343	0.000491828	0.0021821	0.000270573
TG(18:3/18:2/18:2)	TG	432.643	367.559	499.633	659.262	219.455	409.031	399.52	514.592	3.57443	4.78354	8.2821	6.29967	2.02954	12.6	9.72918	8.76748
TG(18:3/18:2/18:2)	TG	28.1759	26.6769	28.5556	54.6641	17.7967	21.2521	21.5548	29.0126	0.213041	0.179409	0.219877	0.499385	0.126043	1.15192	0.433084	0.356129
TG(18:3/18:2/18:3)	TG	74.8997	64.3939	81.3467	137.622	26.9321	72.978	56.4045	87.4649	0.280034	0.438365	0.668884	0.575264	0.154029	1.15356	1.01275	1.03938
TG(18:3/18:2/20:3)	TG	79.0052	74.7237	107.544	154.208	61.3716	58.6204	83.1194	102.621	0.0815102	0.330225	0.481396	0.237137	0.0780635	0.895908	0.762361	0.70312
TG(18:3/18:2/20:4)	TG	48.2034	47.7543	51.8886	70.9623	26.0707	34.551	37.9688	51.97	0.127912	0.0993901	0.122914	0.173475	0.0800099	0.198423	0.173351	0.416654
TG(18:3/18:2/20:5)	TG	8.03806	10.054	8.10218	17.368	5.21414	11.3566	8.13384	10.7543	0.0133833	0.0146215	0.0119735	0.0111347	0.0117709	0.0290129	0.0251177	0.0472941
TG(18:3/18:2/22:5)	TG	4.67029	4.17453	6.33686	5.90992	3.14682	3.03776	4.0106	4.97876	0.00328716	0.014529	0.0152385	0.00608384	0.00766462	0.0188188	0.0224882	0.0225279
TG(18:3/18:2/22:6)	TG	15.7656	14.4416	19.6869	25.481	10.0284	12.0303	11.6294	15.0635	0.0346259	0.032528	0.0298936	0.016886	0.0238669	0.0479955	0.0347527	0.041427
TG(18:3/18:3/22:6)	TG	1.39838	1.45085	2.08662	2.73561	0.800534	1.44626	0.887512	1.66887	0.00132057	0.00187063	0.00127661	0.000669874	0.00130389	0.00280304	0.00180867	0.00340104
TG(18:4/13:0/18:2)	TG	0.0653549	0.303792	0.602038	0.119232	0.496995	0.709395	0.757547	1.05407	0.00195388	0.00228105	0.00522635	0.00685077	0.00056313	0.0199925	0.0125059	0.0124056
TG(18:4/15:0/16:1)	TG	0.343446	0.670098	0.385194	0.740393	0.294846	0.298527	0.468449	0.34334	0.00231351	0.0131101	0.000579163	0.0204967	0.00310289	0.0427825	0.0389128	0.0308848
TG(18:4/16:1/18:2)	TG	24.3309	16.4808	26.3775	35.6494	10.06	20.0709	14.9026	47.1036	0.177494	0.468034	0.290889	0.449297	0.125684	1.33028	1.28571	0.860061
TG(18:4/17:1/18:2)	TG	4.04925	3.04628	4.82184	6.81378	1.217	3.37286	4.47847	5.99104	0.0132254	0.0209164	0.0291694	0.0279895	0.00819941	0.0706354	0.046036	0.0646701
TG(18:4/18:1/20:5)	TG	1.05035	0.748407	1.09048	1.84016	0.595619	0.784464	0.624021	0.906317	0.00229378	0.000570584	0.000498294	0.000531691	0.00177594	0.00251782	0.00163795	0.00196805
TG(18:4/18:2/18:3)	TG	6.81683	4.0241	5.75805	14.0506	1.79231	5.10348	3.6804	10.5965	0.0154293	0.0154815	0.0208611	0.0227499	0.0158243	0.0835453	0.0559261	0.0657164
TG(19:0/18:1/18:1)	TG	20.8402	16.8653	30.0357	43.0293	17.5991	20.3422	26.5416	30.8607	0.0213479	0.0392572	0.0941065	0.0676797	0.0274762	0.360683	0.128552	0.089966
TG(19:0/18:1/18:2)	TG	44.6084	43.4084	66.6297	81.1668	39.2996	48.0512	59.2926	65.594	0.120149	0.0861466	0.250052	0.129821	0.0643632	0.820305	0.24372	0.241702
TG(19:0/18:1/20:1)	TG	12.5145	5.08967	9.34886	18.5459	4.8443	6.71248	5.8946	7.35994	0.0643836	0.0552095	0.108208	0.0688199	0.0417435	0.183958	0.128532	0.0193361
TG(19:0/18:2/18:3)	TG	1.34315	1.53944	1.67146	2.06372	1.34897	1.25115	0.194273	1.35126	0.00841198	0.00257343	0.0109556	0.00177547	0.00459764	0.00582988	0.00247841	0.00238258
TG(19:0/18:2/20:1)	TG	4.48689	3.12902	5.70751	6.31377	2.86548	4.90224	4.65753	5.53876	0.0751289	0.0645831	0.0993369	0.0567119	0.0516455	0.133683	0.0926215	0.073623
TG(19:0/18:2/20:2)	TG	0.518192	0.942717	1.28157	1.84978	0.855852	1.85223	1.59423	1.73202	0.00622785	0.00117191	0.00228929	0.00378713	0.00108469	0.0376377	0.00801804	0.0394669
TG(19:1/18:1/18:1)	TG	39.0337	26.0668	47.3038	66.3589	19.5352	35.6885	36.5055	52.8708	0.111399	0.067894	0.189098	0.122898	0.0450693	0.918698	0.276295	0.270838
TG(19:1/18:1/18:2)	TG	68.3975	38.9288	53.7899	92.8255	28.6232	42.3204	46.6524	77.4999	0.202975	0.134455	0.331123	0.230486	0.0846774	1.27883	0.442699	0.47453
TG(19:1/18:2/18:2)	TG	33.5215	28.5071	39.3858	46.0582	23.7236	30.1326	32.8954	35.077	0.149271	0.0303566	0.400325	0.267271	0.101987	0.760941	0.421506	0.417713
TG(19:1/18:2/18:3)	TG	5.69667	5.19497	7.29954	10.0903	5.1604	6.50337	6.19496	5.81644	0.0537481	0.0491468	0.0957561	0.0617479	0.0303486	0.0834088	0.0698978	0.0661799
TG(19:1/18:2/22:5)	TG	0.356367	0.278803	0.605768	0.389067	0.410935	0.228532	0.363322	0.299505	0.0004263	0.000314316	0.000433719	0	0.000319737	0.000606597	0	0
TG(19:1/18:3/20:5)	TG	2.72798	2.56071	3.43197	4.03129	2.47351	3.38949	2.79183	4.32867	0.00997113	0.00948323	0.0167513	0.0131016	0.00730747	0.0488962	0.0236656	0.0197467
TG(20:0/18:1/18:2)	TG	122.436	108.897	176.773	179.209	82.4242	121.266	117.931	149.428	0.364241	0.274328	0.858787	0.472509	0.205032	2.56149	1.05259	0.983494
TG(20:0e/12:0/22:5)	TG	1.76516	1.32298	1.83632	1.99762	1.1032	1.80323	1.59519	2.17873	0.00866416	0.011904	0.0123658	0.020293	0.0112891	0.138105	0.0554159	0.0336528
TG(20:0e/16:0/18:1)	TG	0.735659	0.70896	0.836933	1.28487	0.525602	0.965925	1.03105	1.30296	0.00289683	0.000561555	0.00750156	0.00129047	0.00118352	0.0106485	0.00416012	0.00165152
TG(20:0e/16:0/20:1)	TG	0.2158	0.194979	0.422859	0.354932	0.208234	0.262479	0.32106	0.324673	0.000267096	0.00010842	0.00250656	0.000160037	0.000469212	0.00149159	0.000222331	0.00016449
TG(20:0e/16:0/22:5)	TG	0.18058	0.200745	0.209263	0.260219	0.210209	0.237194	0.261854	0.293562	0	0.000152407	0.000670896	0.000258991	0.000412521	0.0021016	0.000952706	0.00125261
TG(20:0e/18:2/20:1)	TG	0.465674	0.431911	0.594697	0.53402	0.560927	0.697583	0.743299	0.816048	0.00356566	0.00303136	0.00877295	0.00414141	0.00204843	0.0168537	0.00385596	0.00687625
TG(20:0p/16:0/16:0)	TG	1.60574	1.21684	1.44884	2.32454	1.00837	1.74111	1.70205	2.42948	0.00579365	0.00630997	0.0130096	0.00710189	0.00382664	0.0432601	0.0163599	0.012595
TG(20:0p/18:1/20:1)	TG	0.285928	0.24529	0.297589	0.390269	0.209577	0.38672	0.340025	0.467971	0.00201659	0.0017913	0.00299741	0.0010137	0.000857924	0.00379106	0.00141719	0.00286466
TG(20:1/18:1/18:1)	TG	92.6764	71.5896	101.19	146.276	54.528	88.8931	93.5646	126.396	0.478272	0.263363	0.806685	0.473052	0.176044	3.82245	1.5987	0.935154
TG(20:1/18:1/18:1)	TG	0.0370539	0.0206846	0.234654	0.0246758	0.0870867	0.0951051	0.0483178	0.0539853	0.00331567	0.000704308	0.000581577	0.00043043	0.00147888	0.00149705	0.00156142	0.00255343
TG(20:1/18:1/18:1)	TG	0.0668449	0.0336302	0.0217446	0.018642	0.0143274	0.0284703	0.0885971	0.0588424	0.000473667	8.9565e-05	0.000383829	0.000196415	0.000209757	0.000583398	0.000983907	0.000225014
TG(20:1/18:1/18:2)	TG	91.0404	75.9773	101.936	145.074	58.2659	86.9682	88.0773	96.9562	1.40872	1.13902	2.21687	1.24758	0.591665	2.62836	2.8591	1.71509
TG(20:1/18:1/18:2)	TG	85.4031	64.795	85.5705	104.965	47.8819	69.8283	67.0616	77.2492	0.832645	0.66561	0.636496	0.290482	0.160681	1.46702	1.29847	0.608426
TG(20:1/18:1/18:2)	TG	0.030781	0.0626388	1.33452	1.04761	0.976762	0.440616	0.897427	0.338697	0.0135149	0.00737417	0.00925374	0.00560061	0.00976219	0.0133247	0.00516679	0.00576111
TG(20:1/18:1/18:2)	TG	0.0523402	0.00728767	0.014344	0.0325725	0.00437962	0.0535983	0.00594081	0.12491	0.00042345	0.000164124	0.000891779	5.58025e-05	1.80183e-06	0.000962504	0.000841246	0.000320371
TG(20:1/18:1/22:5)	TG	3.20105	2.53397	3.88443	4.04331	3.11125	2.64492	3.41854	3.03127	0.0106465	0.00800194	0.00743115	0.00724984	0.0102724	0.0383337	0.0203689	0.0149127
TG(20:1/18:1/22:5)	TG	0.0253	0.0500275	0.134655	0.0925731	0.221984	0.156088	0.129098	0.0694202	0	0	0	0	1.55182e-05	0	0	0
TG(20:1/18:1/22:6)	TG	1.4609	1.43079	2.27073	1.81733	1.83419	1.15753	1.9822	1.07636	0.006923	0.000729462	0.00196863	0.000339077	0.0032295	0.00383746	0.00309458	0.00424071
TG(20:1/18:2/18:2)	TG	99.3348	105.471	110.6	115.266	54.4489	89.418	82.0411	94.7273	1.30675	1.07087	2.15854	1.32292	0.668954	3.36119	2.29199	1.80647
TG(20:1/18:2/22:5)	TG	1.34628	2.24146	2.38986	0.847004	3.4076	1.36139	4.48329	0.546539	0.0169336	0.00800624	0.0189682	0.00650463	0.0237346	0.0244003	0.0180023	0.0171906
TG(20:1/18:2/22:6)	TG	3.01453	2.79472	4.06252	3.47961	2.05389	2.05696	2.82167	2.51306	0.0153065	0.00962942	0.0135286	0.00416991	0.0171188	0.0102541	0.0113716	0.00946676
TG(20:1/18:3/22:6)	TG	2.23824	1.8612	3.00477	2.93393	2.5399	1.46901	2.46643	0.172181	0.0130105	0.00810084	0.0132691	0.00583001	0.0100778	0.0198833	0.0148371	0.0125354
TG(20:1p/16:0/16:0)	TG	0.482346	0.456315	0.593735	0.691714	0.514697	0.480687	0.599954	0.655661	0.00167757	0.00598318	0.00733258	0.00585173	0.00169676	0.0334345	0.0139403	0.00798344
TG(20:2/18:2/22:5)	TG	0.719925	0.230915	0.279298	2.95196	0.596963	0.523997	1.17738	0.436024	0.00335734	0.00202994	0.00600286	0.00212296	0.0236401	0.00195558	0.0018436	0.00165946
TG(20:3/18:2/22:5)	TG	1.43381	1.27785	2.20334	2.50724	1.88003	0.849646	1.58364	1.1423	0.014335	0.0127661	0.0139852	0.00813486	0.0168788	0.0103742	0.0122429	0.0105038
TG(20:3/18:2/22:6)	TG	2.39558	2.01414	2.87602	3.17311	2.62366	1.567	2.26042	2.04407	0.0129074	0.00520707	0.00591435	0.00363239	0.0091537	0.00747568	0.00683868	0.0121685
TG(20:5/17:1/18:2)	TG	1.22645	0.812424	1.24908	2.19594	0.656469	0.962425	1.02816	1.9902	0.00448229	0.00357099	0.000614368	0.00277859	0.00209568	0.0226809	0.0144427	0.0347786
TG(20:5/18:2/22:6)	TG	1.83602	1.49096	1.4705	2.44474	0.925395	1.22665	0.928426	1.73667	0.004388	0.00311306	0.00332933	0.00140626	0.00213914	0.00332025	0.00242346	0.00474133
TG(22:0/18:2/18:2)	TG	13.6816	11.4413	21.7807	25.1806	7.82121	16.2825	13.8147	18.7133	0.0343189	0.0253689	0.0823985	0.0246367	0.0172719	0.106376	0.0346938	0.0659945
TG(22:0/18:2/18:3)	TG	3.74707	3.07051	3.30922	5.03852	3.23691	3.44898	3.88256	4.62585	0.0143986	0.0143141	0.0286061	0.00761227	0.0142994	0.0281805	0.0220565	0.0230179
TG(22:1/18:2/18:2)	TG	14.3902	12.603	24.1152	21.0098	7.92631	15.6613	12.5728	16.5773	0.111268	0.0981216	0.257898	0.119586	0.0539887	0.387158	0.20153	0.214949
TG(22:1/18:2/22:4)	TG	0.635522	0.579085	0.76064	1.04725	0.617905	0.345948	0.466909	0.777692	0.000634846	0.000596383	0.000941266	0.000113288	0.000162268	0.0042182	0.000205651	0.000295604
TG(22:1/18:2/22:6)	TG	0.97032	0.185953	0.984945	1.3053	0.785598	1.00705	0.882891	0.195491	0.000752824	0.00190137	0.00135286	0.000217183	0.00139271	0.00143564	0.000311224	0.000783643
TG(22:4/13:0/13:0)	TG	1.72036	0.394052	1.58241	2.60339	0.872447	1.72362	2.2556	3.78073	0.0136004	0.0238639	0.0374173	0.0664444	0.00481117	0.17304	0.141307	0.112693
TG(22:5/17:1/18:2)	TG	2.8103	2.04088	4.28274	3.75485	2.15267	2.54168	2.47125	3.60149	0.0144556	0.0120438	0.026514	0.010608	0.00993415	0.0382654	0.0307495	0.0235742
TG(22:5/18:2/18:2)	TG	1.32023	1.16753	2.02043	2.14906	1.17196	1.52588	1.67895	1.92148	0.00696466	0.00363119	0.00205996	0.00259398	0.0036698	0.00531949	0.00663853	0.00830262
TG(22:5/18:2/18:2)	TG	13.8379	14.4918	20.7458	18.6661	20.9498	13.7014	14.7485	13.1597	0.0775411	0.07888	0.0773291	0.0377627	0.0559162	0.1141	0.0958986	0.11305
TG(22:5/18:2/22:6)	TG	0.730136	0.596719	1.05101	0.952294	0.722377	0.44464	0.531313	0.35012	0.00130982	0.001437	0.000358884	0.000157593	0.00128745	0.000635801	0	0.000652528
TG(23:0/10:2/11:4)	TG	0.206005	0.270697	0.375085	0.708301	0.413622	0.4743	0.399712	0.468343	2.56131e-05	2.2316e-05	1.3434e-05	7.58648e-06	0.000123454	1.6649e-05	0	2.69381e-05
TG(24:0/18:2/18:2)	TG	5.03499	5.20416	9.01673	11.9521	3.73635	7.88838	6.31723	8.23756	0.0182998	0.0204821	0.0511772	0.0154607	0.00871151	0.0497014	0.0127041	0.0315735
TG(24:0/18:2/18:3)	TG	0.8607	0.826214	1.51262	2.0457	0.586847	1.07354	0.935935	1.45063	0.0025942	0.00257558	0.00755186	0.00214875	0.00133148	0.00970146	0.00211931	0.00590812
TG(24:1/18:2/18:2)	TG	10.8369	9.31852	18.0984	21.082	6.59156	12.5903	11.7738	15.1842	0.0468404	0.0391068	0.131463	0.0455949	0.0169903	0.15025	0.0426216	0.0793179
TG(24:1/18:2/18:3)	TG	3.22502	3.44743	5.3453	4.05053	3.24797	3.8252	4.36969	4.91282	0.0223676	0.0127188	0.0148603	0.00796926	0.013192	0.0278257	0.0200549	0.0249913
TG(24:1/18:2/20:3)	TG	0.674597	0.766124	1.47531	1.56372	0.671484	0.787963	1.07148	0.963061	0.000117649	0.000191277	0.00203582	0.000189492	7.85737e-05	0.00604004	0.000941521	0.0024051
TG(24:1/18:2/22:6)	TG	0.219135	0.362378	0.523579	0.497361	0.561006	0.358459	0.394129	0.336468	0.000115654	0	0	0	0	0.000142062	0.00010155	7.75035e-05
TG(25:0/16:0/18:1)	TG	0.39513	0.409931	0.83609	0.722003	0.426503	0.381908	0.610158	0.513013	0.00730237	0.010298	0.0132852	0.00698515	0.00813516	0.00382791	0.0106652	0.0067054
TG(25:0/18:1/18:1)	TG	0.447439	0.593293	0.919242	1.08222	0.669746	0.642112	0.597162	0.806111	0.00446914	0.00197985	0.00654601	0.002689	0.00175893	0.00829721	0.00366561	0.00401821
TG(25:0/18:1/18:2)	TG	1.09619	0.962774	2.8688	2.14546	0.885092	1.2739	1.43153	1.66237	0.0054077	0.00367419	0.0116537	0.00217862	0.00215615	0.009696	0.00187127	0.00564853
TG(25:0/18:2/18:2)	TG	0.495788	0.582595	1.15185	1.21636	0.486563	0.736255	0.782963	1.10144	0.0025942	0.00199662	0.00577755	0.00141576	0.000765139	0.00649584	0.000541404	0.00331098
TG(25:1/18:1/18:1)	TG	0.225074	0.3353	0.646321	0.979217	0.214398	0.518309	0.410302	0.851896	0.000687475	0.000753756	0.00360091	0.00021569	0.000201442	0.00357954	8.44779e-05	0.0025031
TG(25:1/18:1/18:2)	TG	0.807766	0.748824	1.38386	1.65386	0.617351	0.919553	0.980027	1.29925	0.00182121	0.000247669	0.00559851	0.00106868	0.000259645	0.00895771	0.00124176	0.00302491
TG(25:1/18:2/18:2)	TG	0.592278	0.513814	1.02923	1.26924	0.50308	0.647099	0.643564	0.727728	0.00154994	0.00108828	0.00456451	0.00118215	0.000377184	0.00607689	0.00088481	0.00303948
TG(26:0/15:0/16:0)	TG	0.0950938	0.106223	0.207458	0.207815	0.112928	0.148826	0.143153	0.12621	0.0193568	0.0171971	0.00237177	0.00979631	0.0176044	0.00778546	0.00139462	0.00714775
TG(26:0/16:0/16:0)	TG	0.15328	0.154612	0.345724	0.321157	0.167772	0.166325	0.248954	0.2618	0.00648222	0.00117127	0.00691013	0.00408847	0.00608105	0.00600456	0.0074627	0.0029918
TG(26:0/18:1/18:1)	TG	0.765356	0.885886	1.81827	1.50002	0.943571	1.35527	1.62022	1.10608	0.00265122	0.00218215	0.00883531	0.00164788	0.0019445	0.0165808	0.00229395	0.00422349
TG(26:0/18:1/18:2)	TG	1.55259	1.51102	2.89166	3.00364	1.3711	2.01759	2.04092	2.60779	0.00598005	0.00466529	0.0143252	0.00393644	0.00442757	0.0162532	0.0034164	0.0104746
TG(26:0/18:2/18:2)	TG	0.605408	0.679876	1.41153	1.69473	0.639716	1.08142	1.0272	1.35869	0.00346917	0.00308726	0.00938048	0.00176868	0.00147302	0.0101163	0.00124588	0.00565251
TG(26:1/18:1/18:1)	TG	0.407634	0.312066	1.54751	1.93993	0.679545	1.12254	1.28424	0.94913	0.00104667	0.000380963	0.00338767	0.000581779	0.000896095	0.00667325	0.000620485	0.000915288
TG(26:1/18:1/18:2)	TG	1.9694	1.66898	3.49935	4.01447	1.46514	2.4953	2.64068	4.31659	0.00574541	0.0032786	0.0164194	0.00397038	0.00151214	0.0164716	0.00368131	0.00949457
TG(26:1/18:2/18:2)	TG	1.17747	0.966953	2.64738	2.90989	0.932507	1.51538	1.83201	2.28553	0.00498886	0.00472334	0.0132932	0.00451198	0.00141293	0.0145338	0.00332024	0.00795298
TG(26:1/8:0/23:0)	TG	0.491724	0.207682	0.460403	0.799889	0.252646	0.169824	0.244718	0.493232	0.00140543	0.00134197	0.00453232	0.00204288	0.00114195	0.0140561	0.00613421	0.00575051
TG(27:0/18:1/18:2)	TG	0.125458	0.24061	0.551497	0.703493	0.247826	0.377708	0.429267	0.44429	0.000635065	0.000520492	0.00164254	0.000271479	0.000100551	0.00433966	0.000214482	0.00167138
TG(27:1/18:1/18:2)	TG	0.151925	0.141157	0.302282	0.334619	0.114035	0.233694	0.311433	0.237933	0.000111224	0.000101239	0.00035466	0	8.27688e-05	0.00199652	0.000120663	0.000334674
TG(27:1/18:2/22:2)	TG	0.0825063	0.082262	0.167868	0.216469	0.0919863	0.128177	0.147967	0.128811	9.45361e-05	0	0.00128567	8.30997e-05	0	0.00131964	0	0.000339707
TG(28:0/16:0/18:1)	TG	0.123166	0.0788689	0.370994	0.390629	0.224276	0.226607	0.296704	0.304799	0.000133833	0.000704523	0.000226314	7.43581e-05	0.000120657	0.00274163	0.000334772	0.000493204
TG(28:0/18:1/18:1)	TG	0.0364078	0.256823	0.644396	0.715753	0.294293	0.443853	0.517258	0.592231	0.000237272	0.00044804	0.00256087	0.00129468	6.61395e-05	0.00719865	0.000319269	0.00103832
TG(28:0/18:1/18:2)	TG	0.583213	0.630818	1.36099	1.67069	0.845579	0.747104	1.13502	1.23888	0.0035218	0.00169219	0.00711331	0.0024881	0.00125646	0.0168128	0.00181181	0.00624584
TG(28:0/18:2/18:2)	TG	0.101721	0.147843	0.289407	0.313345	0.171486	0.22197	0.318653	0.28186	0.000403056	0.000478999	0.00175197	0.000266864	0.000197474	0.00268295	0	0.00120215
TG(28:1/18:1/18:2)	TG	0.287491	0.268022	0.607694	0.647122	0.2807	0.437116	0.471145	0.57923	0.00132912	0.000114547	0.00555224	0.000704216	0.000161475	0.00867659	0.000182064	0.00281831
TG(28:1/18:2/18:2)	TG	0.218197	0.170575	0.346446	0.374523	0.166982	0.232557	0.270903	0.350584	0.000109864	0.000194717	0.00239994	0.000158001	0	0.00393162	5.78296e-05	0.00195613
TG(30:0/16:0/18:2)	TG	0.108056	0.134889	0.341873	0.319234	0.158605	0.218645	0.274754	0.206636	0.000864223	0.000140367	0.0027902	0.000356995	0.000193316	0.00410357	0.000346938	0.0010227
TG(30:0/18:1/18:1)	TG	0.15057	0.13071	0.640545	0.364908	0.204519	0.321537	0.318076	0.342969	0.000897775	0.00010326	0.000663855	0.000396495	5.94688e-05	0.0082126	0.000518445	0.00157073
TG(30:0/18:1/18:2)	TG	0.190584	0.259581	0.445482	0.605295	0.31073	0.401506	0.549508	0.43361	0.00454589	0.00291742	0.0113137	0.00218812	0.00107864	0.0211115	0.00122763	0.00832911
TG(30:0/18:2/18:2)	TG	0.114204	0.195981	0.336939	0.371278	0.191085	0.230107	0.316824	0.250749	0.00120719	0.000507592	0.00354458	0.000436402	0.000211268	0.00336665	0	0.00134293
TG(30:0/18:2/20:1)	TG	0.195689	0.168235	0.54897	0.561905	0.426741	0.433616	0.576656	0.537995	0.00726509	0.00381823	0.00953336	0.00230621	0.00086038	0.0118904	0.000280415	0.00618756
TG(30:0/18:2/22:2)	TG	0.309373	0.435839	0.889158	0.817797	0.672828	0.661798	0.897331	0.832393	0.00646468	0.00253474	0.00794413	0.00217726	0.000771564	0.0102637	0.000492738	0.00447512
TG(30:1/18:1/18:2)	TG	0.218718	0.25348	0.518285	0.613468	0.256914	0.356972	0.44159	0.553226	0.000899968	0.000604768	0.00577755	0.0010061	0.000372649	0.011436	0.000299646	0.00602334
TG(30:1/18:1/20:1)	TG	0.15776	0.0944388	0.319731	0.367792	0.193614	0.244368	0.31047	0.415128	0.000285735	0	0.000418631	1.72796e-05	0	0.00302138	6.19504e-05	0.000406324
TG(30:1/18:1/20:2)	TG	0.346468	0.434836	0.894092	0.956982	0.585425	0.70362	0.763805	0.898702	0.00630679	0.000878021	0.00843096	0.00257905	0.000452016	0.0164307	0.000498625	0.0104654
TG(30:1/18:2/18:2)	TG	0.161512	0.173416	0.386517	0.404331	0.151177	0.22547	0.282071	0.347519	0.0011743	0.000459864	0.00331123	0.000139133	0.000260212	0.00536726	8.09261e-05	0.00251767
TG(30:1/18:2/20:2)	TG	0.203192	0.336219	0.507214	0.628372	0.381143	0.463626	0.605441	0.62455	0.000110413	0.0022359	0.000146873	0.00157729	0.000515699	0.00872981	0.000192916	0.00558099
TG(30:1/18:2/22:2)	TG	0.199753	0.322095	0.583145	0.576208	0.463251	0.464851	0.620363	0.489517	0.00677169	0.00404397	0.00026172	0.00250439	0.000718464	0.00875437	0.00043485	0.00553199
TG(4:0/14:0/16:0)	TG	0.302183	0.294599	0.397708	0.846764	0.29943	0.422854	0.265512	0.457291	0.00459633	0.00288302	0.00481798	0.00187863	0.00275896	0.0018	0.00291993	0.00224485
TG(4:0/14:0/16:0)	TG	0.433997	0.395974	0.504927	1.26323	0.339733	0.410955	0.369002	0.598825	0.0022236	0.0022488	0.00290085	0.00116139	0.000299895	0.00367779	0.0029474	0.00180647
TG(4:0/14:0/16:1)	TG	0.227783	0.141575	0.219973	0.662387	0.0780303	0.212171	0.130061	0.38151	8.55452e-05	4.78354e-05	3.77794e-05	6.75439e-05	5.85996e-05	0.00117007	0.000684457	0.00046314
TG(4:0/14:0/18:2)	TG	1.27334	1.06557	1.35498	3.07095	0.922234	1.574	1.03971	2.05707	0.00178524	0.00124307	0.00350234	0.000896695	0.00109149	0.00764626	0.00383633	0.00543266
TG(4:0/14:0/18:2)	TG	2.19239	2.44204	2.98191	5.87146	1.63505	2.61605	2.13815	3.47333	0.00391653	0.00292387	0.00992162	0.00235644	0.00140707	0.0252874	0.00975469	0.0124639
TG(4:0/14:1/18:2)	TG	0.455775	0.48707	0.549933	1.02177	0.372134	0.670985	0.368425	0.752432	9.42948e-05	4.66959e-05	9.19741e-05	5.07122e-05	2.0182e-05	0.0030323	0.00120467	0.00140651
TG(4:0/15:0/18:1)	TG	0.0577065	0.123355	0.0919483	0.117561	0.0520703	0.0672735	0.0448714	0.0732558	7.02387e-05	0	0.000109375	1.83248e-05	0	0.00108614	0.000258241	0.00061677
TG(4:0/15:0/18:2)	TG	0.168701	0.162217	0.158602	0.412985	0.105342	0.167549	0.139976	0.514128	0.000145302	0	0.000440156	4.2595e-05	3.84932e-05	0	0	6.72659e-05
TG(4:0/15:0/18:2)	TG	0.274882	0.354939	0.372438	0.498683	0.35862	0.323287	0.508401	0.338511	0.000547129	0	0.00219273	0.0001918	3.84932e-05	0.00122766	0.000743523	0.00110428
TG(4:0/16:0/16:0)	TG	3.08852	3.04962	3.75567	7.18397	2.52251	3.49535	2.49243	3.13157	0.0165696	0.0173583	0.0162363	0.010494	0.000689362	0.0252055	0.0254513	0.0209254
TG(4:0/16:0/16:1)	TG	1.28792	0.883379	1.24908	3.55413	0.586373	1.47076	0.776127	1.97163	0.00203282	0.00158405	0.00284854	0.00281524	0.000946173	0.00971374	0.00545721	0.00503799
TG(4:0/16:0/17:0)	TG	0.607909	0.745732	0.574962	1.33054	0.398133	0.476925	0.470663	0.729214	0.000526735	0.00393862	0.00513985	0.00221527	0.00104973	0.00612738	0.00445643	0.00445393
TG(4:0/16:0/17:1)	TG	0.13369	0.131713	0.16859	0.225964	0.125256	0.147163	0.240771	0.195305	4.10292e-05	4.40085e-05	0.00018938	2.6985e-05	6.47789e-05	0.00129712	0.000287087	0.000535717
TG(4:0/16:0/18:0)	TG	0.774109	0.941045	1.37062	1.51204	1.04393	1.00355	0.959714	0.918855	0.0379153	0.00534896	0.011881	0.021664	0.0101382	0.00961821	0.010312	0.00793444
TG(4:0/16:0/18:1)	TG	12.2332	10.4635	14.3079	26.9354	7.6916	12.9227	10.4164	13.9305	0.0439239	0.0239284	0.074734	0.0234286	0.020371	0.264746	0.116876	0.115845
TG(4:0/16:0/18:2)	TG	18.652	20.2417	24.7169	43.7385	14.2721	25.2243	16.7798	25.1863	0.0458755	0.0296042	0.0899423	0.0267542	0.0238291	0.17577	0.0919347	0.112401
TG(4:0/16:0/18:3)	TG	1.52967	1.46589	1.91213	4.00846	0.966488	1.81898	1.0763	2.11093	0.00317971	0.00211185	0.00659027	0.00177819	0.000540076	0.010235	0.00398743	0.011603
TG(4:0/16:0/22:6)	TG	0.731387	0.846606	1.02947	1.62261	0.90959	0.895055	0.736657	0.862111	4.06345e-05	0	1.87851e-05	1.95329e-05	2.60401e-05	0.000128634	0.000114089	0.000250178
TG(4:0/16:1/18:1)	TG	1.11078	0.767211	1.23223	3.27407	0.69211	1.3124	0.759088	1.90569	0.00099799	0.000365484	0.00122029	0.000487983	0.000453528	0.012005	0.00544936	0.00561675
TG(4:0/16:1/18:2)	TG	2.58835	1.84281	2.70995	5.43395	0.91196	2.88902	2.20554	4.43361	0.00222141	0.00137508	0.00341986	0.00160715	0.00194828	0.0168537	0.00986066	0.0109819
TG(4:0/16:1/18:2)	TG	1.89333	2.00662	2.73763	4.58659	2.6126	2.21708	1.85801	2.99598	0.00737473	0.00468464	0.0133978	0.00458663	0.00324272	0.0189417	0.0118544	0.015204
TG(4:0/16:1/18:3)	TG	1.4609	1.62886	1.87122	3.17431	1.03761	1.46639	1.35163	2.14529	0.000317094	7.06028e-05	0.0028405	0.000664037	0.000265692	0.00584762	0.00336734	0.00473073
TG(4:0/17:0/18:2)	TG	0.252687	0.442943	0.546804	0.83162	0.343763	0.509298	0.256848	0.520629	0.0105106	0.00420091	0.014645	0.00300799	0.00257944	0.012469	0.00500195	0.00642595
TG(4:0/17:0/18:2)	TG	0.0992931	0.171828	0.162693	0.15529	0.161608	0.0888056	0.120722	0.0383738	0.000317752	4.4976e-05	0.00118086	6.63359e-05	0.000131674	0.000966325	0.000151177	0.000369241
TG(4:0/17:1/18:2)	TG	1.19623	0.942717	1.27917	2.92071	0.0159712	0.783589	1.07726	2.03942	0.00089602	0.000187923	0.00380811	4.39796e-05	0.000419135	0.00742382	0.00247645	0.00461683
TG(4:0/18:0/18:2)	TG	8.67056	10.0874	13.4415	15.1684	9.57796	11.5753	10.3201	11.0237	0.0160192	0.011115	0.0294711	0.00793533	0.0106239	0.0434102	0.137794	0.032686
TG(4:0/18:1/18:2)	TG	1.34419	1.29624	1.73042	3.08297	1.38612	2.8584	2.09002	3.04056	0.00200256	0.00117019	0.0055784	0.000962392	0.000964881	0.0132005	0.00484104	0.00700471
TG(4:0/18:1/18:2)	TG	16.6305	16.3137	21.2392	33.1374	11.4904	23.1244	16.0578	22.2609	0.036139	0.0196329	0.0647359	0.0170624	0.0187534	0.135021	0.0676608	0.0825759
TG(4:0/18:1/20:4)	TG	0.229138	0.182693	0.243198	0.436423	0.166271	0.245156	0.204573	0.3113	0	0	0	8.97102e-06	0	1.86551e-05	0	1.87004e-05
TG(4:0/18:1/22:6)	TG	0.104514	0.119845	0.154631	0.189065	0.117512	0.119428	0.112154	0.124353	0	0	0	0	0	0	0	0
TG(4:0/18:2/18:2)	TG	15.3175	17.0909	20.9745	30.6013	10.4947	21.6633	14.6908	22.0752	0.023793	0.0210196	0.0536717	0.0148363	0.0137211	0.118058	0.0631867	0.0847214
TG(4:0/18:2/18:3)	TG	2.15279	2.46126	2.75448	4.67433	1.35372	3.44373	0.813384	2.93097	0.00192866	0.00152837	0.0039771	0.00106243	0.00134943	0.00923747	0.00498625	0.00770002
TG(4:0/18:2/18:4)	TG	0.0517462	0.052518	0.0641267	0.103847	0.0274457	0.0796975	0.0344357	0.0762555	0	0	0	0	0	2.77301e-05	0	1.85945e-05
TG(4:0/18:2/19:0)	TG	1.27438	1.56785	1.59083	2.2945	1.46435	1.33427	1.77522	1.9447	0.00508534	0.00195878	0.00838067	0.00251118	0.00215804	0.009696	0.00557299	0.00840989
TG(4:0/18:2/19:1)	TG	1.70056	1.93474	2.21056	3.21758	1.36636	1.87148	2.14874	2.55021	0.00968167	0.00315176	0.0157998	0.00367039	0.00407041	0.0225444	0.0115169	0.0137207
TG(4:0/18:2/20:0)	TG	0.498081	0.496096	0.807089	0.905419	0.405562	0.757778	0.364381	0.607833	0.00024714	0.00183387	0.00108792	0.000133554	0.000196151	0.0118508	0.00449175	0.00483801
TG(4:0/18:2/20:1)	TG	3.56576	3.39562	4.61486	6.40632	2.20404	4.07543	3.29724	4.19586	0.0212273	0.00311306	0.0078013	0.00376134	0.0024944	0.0187915	0.00977039	0.0101872
TG(4:0/18:2/20:4)	TG	0.0420659	0.0406421	0.0567502	0.0705777	0.0194404	0.0426004	0.0254056	0.0379559	0	0	0	2.37137e-05	0	0	0	0
TG(4:0/18:2/20:4)	TG	0.105451	0.110485	0.149336	0.171516	0.0702937	0.1651	0.0860075	0.135126	0	0	2.56892e-05	0	0	6.43852e-05	0	0.000120599
TG(4:0/18:2/20:5)	TG	0.066772	0.077958	0.0703481	0.122597	0.0324955	0.0852883	0.0331553	0.0907803	0	0	0	0	0	0	0	0
TG(4:0/18:2/22:5)	TG	0.0801722	0.0712637	0.11279	0.144954	0.0622962	0.0718494	0.0541325	0.106708	0	0	0	0	0	0	0	0
TG(4:0/18:2/22:6)	TG	0.100658	0.118425	0.156195	0.155531	0.102181	0.109191	0.0810496	0.0965847	0	1.23211e-05	0	0	0	0	0	0
TG(4:0/18:3/18:3)	TG	0.0477241	0.0685893	0.0702879	0.127285	0.0259363	0.0880181	0.0370543	0.0765248	0	0	0	0	0	2.79076e-05	0	1.5747e-05
TG(4:0/18:3/19:0)	TG	0.115767	0.134471	0.0958231	0.142429	0.0570726	0.102804	0.106474	0.0939843	0.000154139	0.000207229	0.000175177	0.000103596	9.96627e-05	0.00044734	8.84025e-05	0.000207532
TG(6:0/14:0/16:0)	TG	0.166201	0.110401	0.137784	0.343513	0.141378	0.153638	0.119375	0.17506	0.00424985	0.00345275	0.00280831	0.00137504	0.00270794	0.000648492	0.0025412	0.000986275
TG(6:0/15:0/18:1)	TG	2.3414	2.32085	2.10948	4.45678	1.46435	1.81461	2.77257	2.9059	0.0152319	0.00574239	0.0227924	0.0073435	0.00588074	0.0673056	0.0253924	0.0318516
TG(6:0/15:0/18:2)	TG	0.14213	0.0616527	0.0694456	0.100302	0.0242057	0.0254955	0.0149315	0.113951	0	0	9.79086e-05	0	0	0.0011279	0.000289442	0.000500488
TG(6:0/15:0/18:2)	TG	0.0299369	2.28492	2.5114	4.05653	1.63347	2.09721	2.50398	2.78795	0.0143372	0.00619387	0.027721	0.00607977	0.00573524	0.0388795	0.0157103	0.0214684
TG(6:0/16:0/16:0)	TG	1.38692	1.15249	1.51141	3.32576	1.38533	1.67637	1.07148	1.65866	0.0379153	0.00526296	0.0214244	0.021664	0.0023489	0.00942443	0.00848115	0.00762188
TG(6:0/16:0/16:1)	TG	0.407738	0.242449	0.344641	1.38583	0.200963	0.41708	0.176848	0.588052	0.000531998	0.000248529	0.000672707	0.000224513	0.000258511	0.00243458	0.00094937	0.00130214
TG(6:0/16:0/18:2)	TG	17.5683	14.7592	20.1321	37.9932	12.2095	17.6824	13.3815	21.2486	0.00297358	0.0243369	0.0583589	0.0218133	0.0232811	0.242775	0.105455	0.111289
TG(6:0/16:0/22:6)	TG	0.160991	0.148428	0.235978	0.421519	0.187845	0.170699	0.12929	0.211186	0	0	0	0	3.02541e-05	0	0	0
TG(6:0/16:1/18:2)	TG	0.698042	0.31449	0.525866	1.74882	0.261734	0.57868	0.349363	1.20545	0.000279376	6.30997e-05	0.000237379	8.43349e-05	0.00016841	0.00375967	0.00168092	0.0021177
TG(6:0/17:0/18:1)	TG	0.447335	0.605411	0.684107	0.790513	0.494387	0.466951	0.54585	0.469086	0.00127715	0.0013209	0.00296321	0.00166959	0.0016739	0.0109924	0.00212715	0.00248456
TG(6:0/18:0/18:1)	TG	0.911342	0.778995	1.17387	1.71036	0.93962	1.02629	0.951916	1.18131	0.00612917	0.019018	0.0269364	0.0226956	0.0176082	0.00180273	0.00638735	0.0401556
TG(6:0/18:0/18:2)	TG	3.44072	3.20423	4.50536	6.0842	3.12469	3.99581	3.82673	4.1745	0.00701071	0.00477279	0.00853557	0.00284374	0.00397026	0.0284261	0.0143406	0.0138134
TG(6:0/18:1/18:2)	TG	3.29067	3.5285	5.26227	7.52412	3.69921	6.88921	5.62601	8.09454	0.00253061	0.00176615	0.00728028	0.00221934	0.00265881	0.0239636	0.0131063	0.019601
TG(6:0/18:1/18:2)	TG	7.46079	6.20789	7.77006	14.7838	4.87907	7.57603	5.55669	8.41123	0.0146727	0.00697429	0.00192719	0.00152978	0.00752478	0.0531267	0.025412	0.0264746
TG(6:0/18:1/18:3)	TG	3.89816	4.40937	6.00714	8.97005	4.10619	8.32147	6.57042	8.94058	0.00200629	0.00161608	0.00553816	0.00200759	0.00216937	0.00353996	0.0049215	0.0131777
TG(6:0/18:2/18:2)	TG	3.64703	3.28196	3.07577	7.38349	1.91085	3.19788	2.10927	3.81788	0.00292533	0.00161759	0.00373972	0.00119179	0.00161796	0.00815119	0.0038952	0.0060048
TG(6:0/18:2/18:3)	TG	0.392734	0.33438	0.421294	0.871043	0.246087	0.490837	0.275235	0.484409	5.97128e-05	0	8.98417e-05	0	0	0.000621472	9.96073e-05	0.000752785
TG(6:0/18:2/20:4)	TG	0.0787864	0.0637754	0.0881457	0.141708	0.0621145	0.0752879	0.0656849	0.0861647	2.42097e-05	2.11314e-05	5.29676e-05	6.47613e-06	0.000120865	1.05571e-05	2.73547e-05	5.07772e-05
TG(8:0/18:2/18:2)	TG	2.63941	2.43284	2.04209	4.18154	1.55207	1.2634	2.24116	2.7248	0.00442966	0.00651636	0.0119071	0.00931851	0.00670654	0.0125946	0.0269819	0.00739144
TG(8:0/18:2/18:3)	TG	0.269568	0.179099	0.218529	0.392432	0.123913	0.192135	0.125343	0.250842	0	3.356e-05	0	0	0	0.000218621	0.00012031	0.000221968
TG(9:0/18:1/18:2)	TG	2.45393	1.61632	2.28036	3.96399	1.006	2.27395	1.90133	3.24209	0.0124074	0.0109065	0.0163449	0.0205509	0.00905544	0.0584899	0.0319858	0.035401
TG(9:0/18:2/18:2)	TG	0.831837	1.61632	0.820808	2.49762	0.438199	1.43839	1.52106	2.2846	0.000381346	0.000519417	0.00277813	0.00211346	0.00105162	0.0151888	0.00131377	0.00740733
TG(9:0/18:2/18:3)	TG	0.161928	0.211693	0.0658235	0.166588	0.0596409	0.113741	0.130638	0.130947	0.000554585	0.000213249	0.00106277	0.000198044	0.000456362	0.00402578	0.00069054	0.00129089
TG(9:0/9:0/22:6)	TG	0.0932911	0.100122	0.132489	0.217911	0.104868	0.0967674	0.0882891	0.12296	3.26962e-05	0	0	0	1.0399e-05	0	0	0
