# Supplementary material for: Mice lacking triglyceride synthesis enzymes in adipose tissue are resistant to diet-induced obesity
Source: PubMed Central journal article supplement (PMC10545428; doi:10.7554/elife.88049), 2023-10-02
Supplement: elife-88049-supp1.pdf [file elife-88049-supp1.pdf]

**Supplementary File 1**

| Primers used for quantitative real-time PCR analysis of mouse genes |              |                                                   |
|---------------------------------------------------------------------|--------------|---------------------------------------------------|
| <i>Dgat1</i>                                                        | Fwd:<br>Rev: | GGAATATCCCCGTGCACAA<br>CATTGCTGCTGCCATGTC         |
| <i>Dgat2</i>                                                        | Fwd:<br>Rev: | CCGCAAAGGCTTTGTGAA<br>GGAATAAGTGGGAACCAGATCAG     |
| <i>Srebp1c</i>                                                      | Fwd:<br>Rev: | GGAGCCATGGATTGCACATT<br>GGCCCGGGAAGTCACTGT        |
| <i>Acc</i>                                                          | Fwd:<br>Rev: | GATGAACCATCTCCGTTGGC<br>GACCCAATTATGAATCGGGAGTG   |
| <i>Fas</i>                                                          | Fwd:<br>Rev: | GGAGGTGGTGATAGCCGGTAT<br>TGGGTAATCCATAGAGCCCAG    |
| <i>Scd1</i>                                                         | Fwd:<br>Rev: | TTCTTGCGATACTCTGGTGC<br>CGGGATTGAATGTTCTTGTCTGT   |
| <i>Ucp1</i>                                                         | Fwd:<br>Rev: | AGGCTTCCAGTACCATTAGGT<br>CTGAGTGAGGCAAAGCTGATTT   |
| <i>CideA</i>                                                        | Fwd:<br>Rev: | TGCTCTTCTGTATCGCCCAGT<br>GCCGTGTTAAGGAATCTGCTG    |
| <i>Pgc1a</i>                                                        | Fwd:<br>Rev: | TTCATCTGAGTATGGAGTCGCT<br>GGGGGTGAAACCACTTTTGTA   |
| <i>Ppar1a</i>                                                       | Fwd:<br>Rev: | AATGCAATTGCTTTGGAAG<br>GGCCTTGACCTTGTTTCATGT      |
| <i>Cpt1a</i>                                                        | Fwd:<br>Rev: | GAACCCCAACATCCCCAAC<br>TCCTGGCATTGTCCTGGAAT       |
| <i>Mcad</i>                                                         | Fwd:<br>Rev: | AGGTTTCAAGATCGCAATGG<br>CTCCTTGGTGCTCCACTAGC      |
| <i>Lcad</i>                                                         | Fwd:<br>Rev: | TCCATGGCAAATACTGGGC<br>TTGCAATCGGGTACTCCAC        |
| <i>Xbp1s</i>                                                        | Fwd:<br>Rev: | GGTCTGCTGAGTCCGCAGCAGG<br>AGGCTTGGTGTATACATGG     |
| <i>Chop</i>                                                         | Fwd:<br>Rev: | CCACCACACCTGAAAGCAGAA<br>AGGTGAAAGGCAGGGACTCA     |
| <i>Bip</i>                                                          | Fwd:<br>Rev: | ACTTGGGGACCACCTATTCT<br>ATCGCCAATCAGACGCTCC       |
| <i>Atf3</i>                                                         | Fwd:<br>Rev: | GAGGATTTTGCTAACCTGACACC<br>TTGACGGTAACTGACTCCAGC  |
| <i>Atf4</i>                                                         | Fwd:<br>Rev: | CCTTCGACCAGTCGGGTTTG<br>CTGTCCCGGAAAAGGCATCC      |
| <i>Tnfa</i>                                                         | Fwd:<br>Rev: | CCCTCACACTCAGATCATCTTCT<br>GCTACGACGTGGGCTACAG    |
| <i>F4/80</i>                                                        | Fwd:<br>Rev: | TGACTCACCTTGTGGTCCTAA<br>CTTCCAGAAATCCAGTCTTTCC   |
| <i>Fgf21</i>                                                        | Fwd:<br>Rev: | GTGTCAAAGCCTCTAGGTTTCTT<br>GGTACACATTGTAACCGTCCTC |
| <i>Cyclophilin</i>                                                  | Fwd:<br>Rev: | GGAGATGGCACAGGAGGAAA<br>CCGTAGTGCTTCAGTTTGAAGTTCT |
| Fwd, forward; Rev, reverse.                                         |              |                                                   |
